# Supplementary material for: Uranyl peroxide closed clusters containing topological squares
Source: Royal Society of Chemistry journal article supplement (doi:10.1039/c0dt00074d), 2010-01-01
Supplement: c0dt00074d.pdf [file c0dt00074d.pdf]

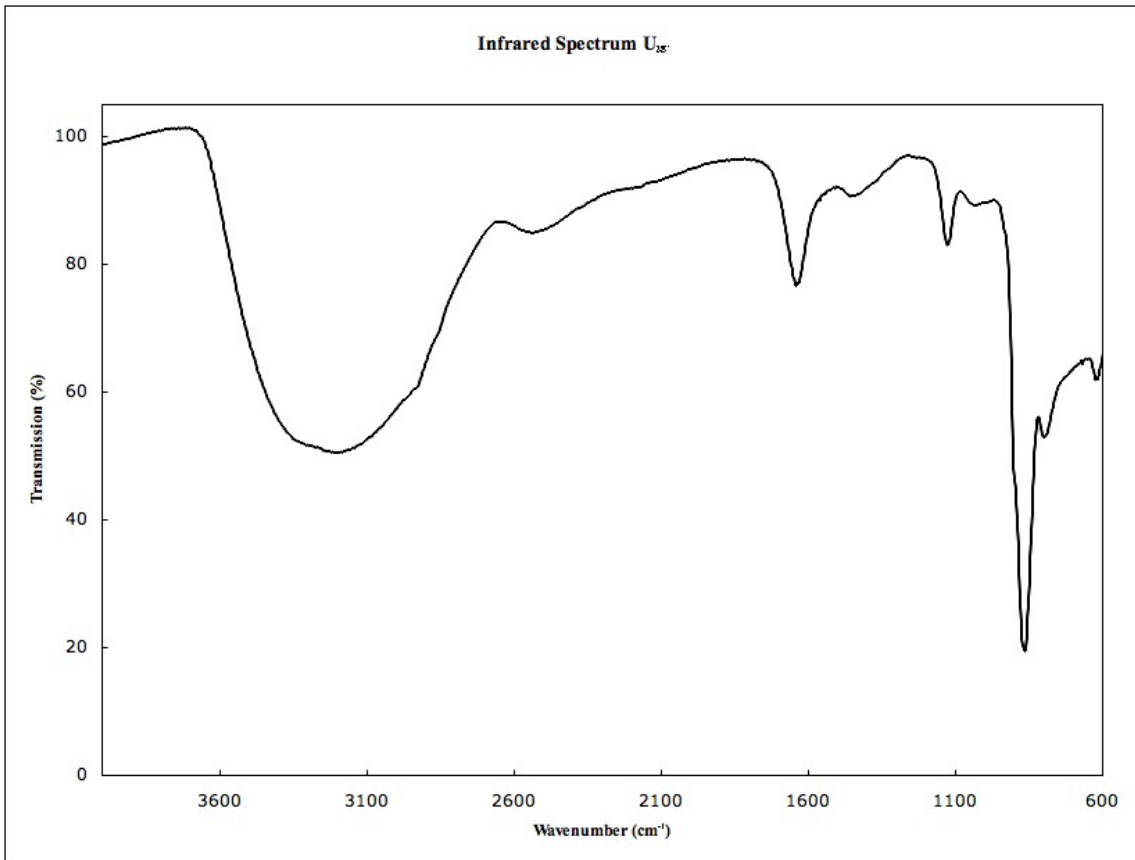

Figure: Infrared spectrum for a crystal containing U<sub>28a</sub>

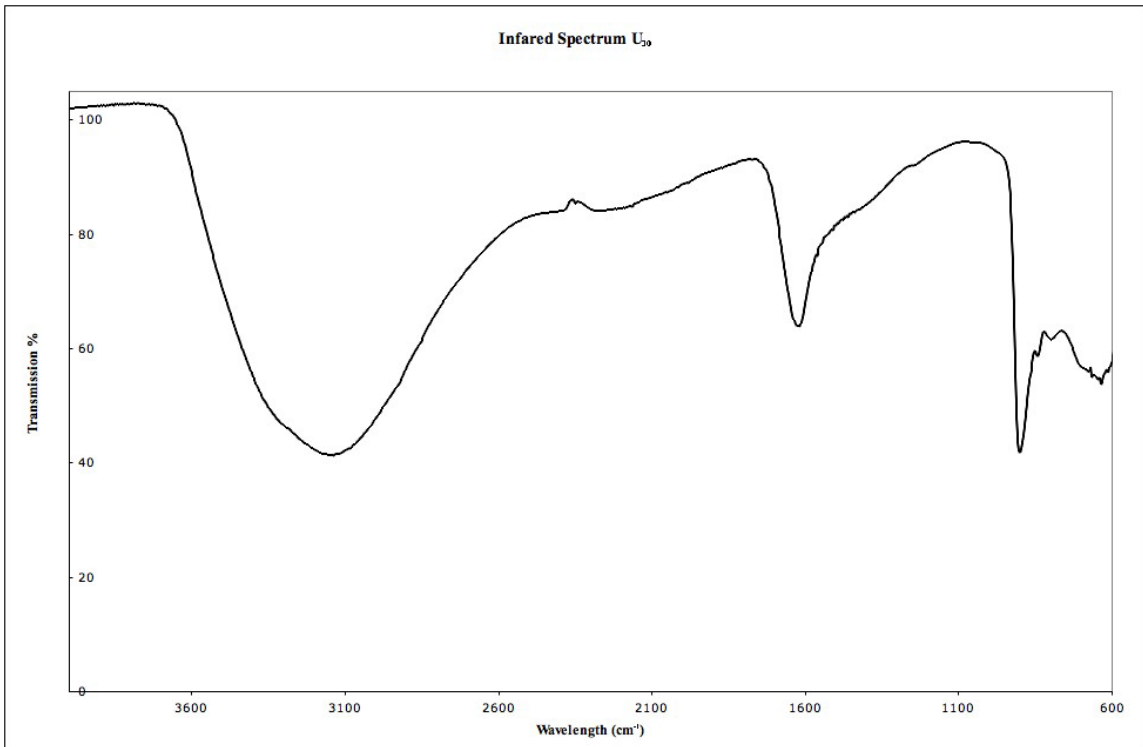

Figure: Infrared spectrum for a crystal containing U<sub>30</sub>.

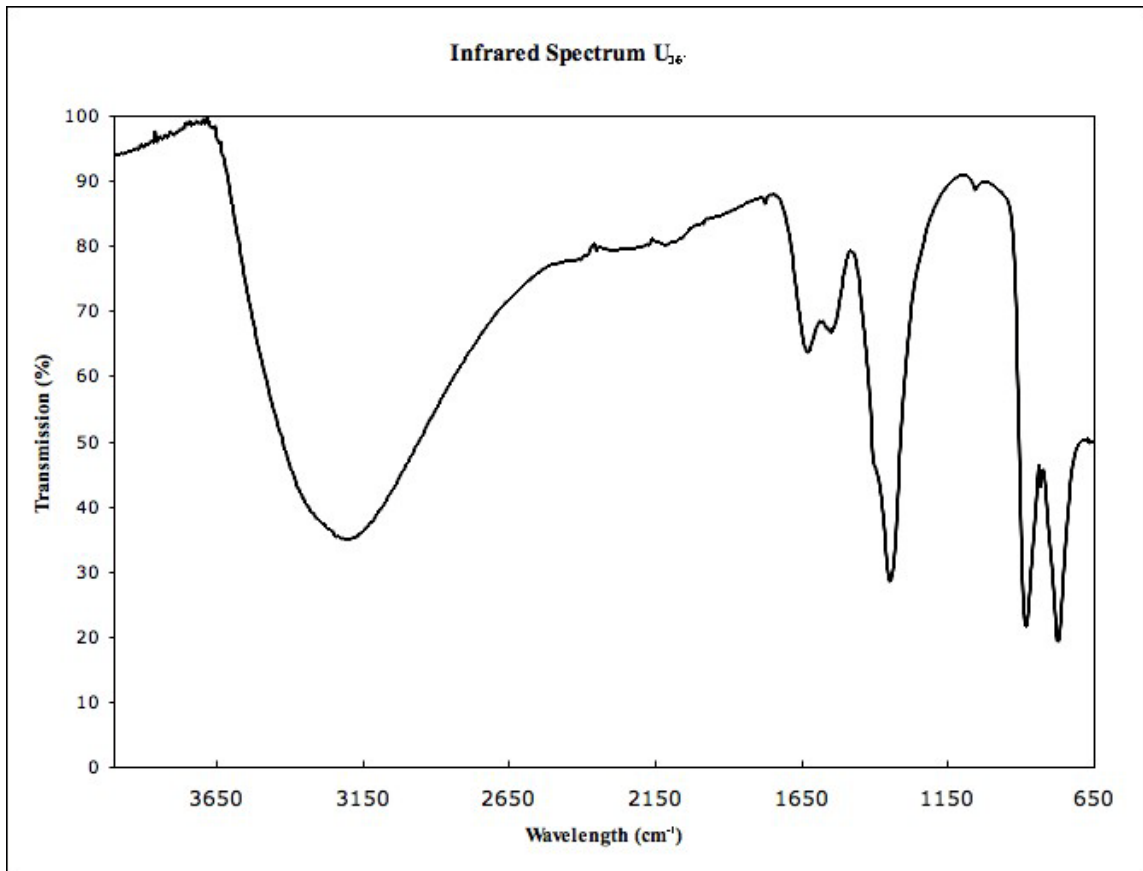

Figure: Infrared spectrum for a crystal containing U<sub>36a</sub>

Table S1 - Crystal Data and Details of the Structure Determination  
For U28a

| Crystal Data                        |                                    |           |           |
|-------------------------------------|------------------------------------|-----------|-----------|
| Formula                             | O14O U28, Na10, O4 S, 56(O), 4(Na) |           |           |
| Formula Weight                      | 10218.77                           |           |           |
| Crystal System                      | Triclinic                          |           |           |
| Space group                         | P-1                                | (No. 2)   |           |
| a, b, c [Angstrom]                  | 18.593(3)                          | 18.648(3) | 36.533(5) |
| alpha, beta, gamma [deg]            | 75.820(4)                          | 89.250(4) | 62.279(4) |
| V [Ang**3]                          | 10796(3)                           |           |           |
| Z                                   | 2                                  |           |           |
| D(calc) [g/cm**3]                   | 3.144                              |           |           |
| Mu(MoKa) [ /mm ]                    | 21.064                             |           |           |
| F(000)                              | 8692                               |           |           |
| Crystal Size [mm]                   | 0.02 x 0.10 x 0.10                 |           |           |
| Data Collection                     |                                    |           |           |
| Temperature (K)                     | 120                                |           |           |
| Radiation [Angstrom]                | MoKa                               | 0.71073   |           |
| Theta Min-Max [Deg]                 | 1.8, 22.5                          |           |           |
| Dataset                             | -20: 20 ; -19: 20 ; -39: 39        |           |           |
| Tot., Uniq. Data, R(int)            | 94832,                             | 28217,    | 0.212     |
| Observed data [I > 2.0 sigma(I)]    | 8823                               |           |           |
| Refinement                          |                                    |           |           |
| Nref, Npar                          | 28217, 1118                        |           |           |
| R, wR2, S                           | 0.0636, 0.1640, 0.65               |           |           |
| w = 1/[\s^2^(Fo^2^)+(0.0000P)^2^]   | where P=(Fo^2^+2Fc^2^)/3           |           |           |
| Max. and Av. Shift/Error            | 0.02, 0.00                         |           |           |
| Min. and Max. Resd. Dens. [e/Ang^3] | -2.00, 2.96                        |           |           |

Table S2 - Final Coordinates and Equivalent Isotropic Displacement  
Parameters of the non-Hydrogen atoms  
For U28a

| Atom | x            | y            | z          | U(eq) [Ang <sup>2</sup> ] |
|------|--------------|--------------|------------|---------------------------|
| ---- | ---          | ---          | ---        | -----                     |
| U1   | 0.52109(10)  | 0.13922(11)  | 0.15788(5) | 0.0207(7)                 |
| U2   | -0.11119(11) | 0.37451(11)  | 0.20117(6) | 0.0239(7)                 |
| U3   | 0.32546(11)  | 0.35482(10)  | 0.17505(5) | 0.0208(7)                 |
| U4   | 0.18670(10)  | 0.37081(10)  | 0.08229(5) | 0.0183(6)                 |
| U5   | 0.22996(11)  | -0.24395(11) | 0.16214(6) | 0.0240(7)                 |
| U6   | 0.38149(10)  | 0.15506(10)  | 0.06522(5) | 0.0190(7)                 |
| U7   | 0.15419(11)  | -0.25655(11) | 0.26230(6) | 0.0248(7)                 |
| U8   | -0.14359(11) | 0.17076(11)  | 0.19657(6) | 0.0254(7)                 |
| U9   | -0.05910(11) | 0.17774(11)  | 0.09082(5) | 0.0221(7)                 |
| U10  | -0.02423(10) | 0.37990(10)  | 0.09551(5) | 0.0201(7)                 |
| U11  | 0.45614(11)  | -0.25460(11) | 0.14825(6) | 0.0240(7)                 |
| U12  | 0.34889(11)  | -0.03337(11) | 0.06107(5) | 0.0223(7)                 |
| U13  | 0.12157(11)  | -0.02258(11) | 0.07485(5) | 0.0222(7)                 |
| U14  | 0.24836(11)  | 0.34844(11)  | 0.27570(6) | 0.0249(7)                 |
| U15  | -0.04797(11) | -0.03370(11) | 0.28080(6) | 0.0261(7)                 |
| U16  | 0.62443(11)  | -0.06677(11) | 0.24075(6) | 0.0271(7)                 |
| U17  | 0.59188(11)  | -0.27770(11) | 0.23591(6) | 0.0279(7)                 |
| U18  | 0.01281(12)  | 0.36103(11)  | 0.29023(6) | 0.0283(7)                 |
| U19  | 0.01970(12)  | -0.02075(12) | 0.38856(6) | 0.0364(8)                 |
| U20  | 0.40774(13)  | 0.15779(13)  | 0.37023(6) | 0.0390(8)                 |
| U21  | 0.32670(13)  | -0.35880(12) | 0.36046(6) | 0.0396(8)                 |
| U22  | 0.04910(13)  | 0.17640(13)  | 0.39273(6) | 0.0381(8)                 |
| U23  | 0.54630(12)  | -0.36998(12) | 0.34592(6) | 0.0389(8)                 |
| U24  | 0.59195(13)  | -0.04683(13) | 0.35345(6) | 0.0418(8)                 |
| U25  | 0.27484(14)  | 0.08759(13)  | 0.44640(6) | 0.0446(9)                 |
| U26  | 0.58419(13)  | -0.25376(13) | 0.41909(7) | 0.0469(8)                 |

Table S2 - Final Coordinates and Equivalent Isotropic Displacement  
Parameters of the non-Hydrogen atoms (continued)  
For U28a

| Atom<br>---- | x<br>---    | y<br>---     | z<br>---   | U(eq) [Ang <sup>2</sup> ]<br>----- |
|--------------|-------------|--------------|------------|------------------------------------|
| U27          | 0.22551(14) | -0.23542(14) | 0.43938(6) | 0.0476(9)                          |
| U28          | 0.38691(15) | -0.16705(14) | 0.47625(6) | 0.0518(9)                          |
| O1           | 0.0850(16)  | 0.3518(16)   | 0.0556(8)  | 0.022(8)                           |
| O2           | -0.0916(15) | 0.0210(15)   | 0.2146(8)  | 0.013(7)                           |
| O3           | 0.2079(16)  | 0.4133(17)   | 0.2087(8)  | 0.024(8)                           |
| O4           | 0.0471(15)  | 0.1264(15)   | 0.0512(8)  | 0.015(7)                           |
| O5           | 0.1112(18)  | -0.2061(18)  | 0.1969(9)  | 0.034(9)                           |
| O6           | 0.2978(15)  | 0.1166(15)   | 0.0355(7)  | 0.013(7)                           |
| O7           | 0.4674(17)  | 0.1920(17)   | 0.0948(8)  | 0.025(8)                           |
| O8           | -0.0284(17) | 0.4272(17)   | 0.2253(9)  | 0.032(9)                           |
| O9           | 0.4396(16)  | 0.2875(16)   | 0.1445(8)  | 0.020(8)                           |
| O10          | 0.5936(16)  | -0.0122(16)  | 0.1746(8)  | 0.018(8)                           |
| O11          | 0.2646(16)  | -0.3209(16)  | 0.2275(8)  | 0.018(8)                           |
| O12          | 0.3636(16)  | 0.3185(16)   | 0.2397(8)  | 0.018(8)                           |
| O13          | 0.1902(17)  | -0.1700(16)  | 0.0973(8)  | 0.022(8)                           |
| O14          | 0.5778(17)  | 0.0842(17)   | 0.2221(8)  | 0.026(8)                           |
| O15          | 0.2513(15)  | -0.0746(16)  | 0.0494(8)  | 0.017(7)                           |
| O16          | -0.0079(15) | 0.0333(15)   | 0.0996(7)  | 0.012(7)                           |
| O17          | 0.3161(14)  | -0.0165(14)  | 0.1052(7)  | 0.002(6)                           |
| O18          | 0.5587(17)  | -0.2255(17)  | 0.1692(9)  | 0.031(9)                           |
| O19          | 0.5143(17)  | -0.3329(17)  | 0.2095(9)  | 0.032(9)                           |
| O20          | -0.1601(16) | 0.2248(17)   | 0.1301(8)  | 0.023(8)                           |
| O21          | -0.0404(15) | 0.1434(15)   | 0.2024(8)  | 0.015(7)                           |
| O22          | 0.3444(17)  | -0.2767(17)  | 0.1292(9)  | 0.028(8)                           |
| O23          | 0.2838(17)  | 0.3916(17)   | 0.1100(9)  | 0.031(9)                           |
| O24          | 0.4011(18)  | -0.1811(18)  | 0.0847(9)  | 0.033(9)                           |

Table S2 - Final Coordinates and Equivalent Isotropic Displacement  
Parameters of the non-Hydrogen atoms (continued)  
For U28a

| Atom<br>---- | x<br>---    | y<br>---    | z<br>---  | U(eq) [Ang <sup>2</sup> ]<br>----- |
|--------------|-------------|-------------|-----------|------------------------------------|
| O25          | 0.2224(16)  | -0.3341(16) | 0.1534(8) | 0.023(8)                           |
| O26          | 0.0195(15)  | 0.1473(15)  | 0.1280(8) | 0.015(7)                           |
| O27          | 0.1211(16)  | -0.3358(16) | 0.2612(8) | 0.021(8)                           |
| O28          | 0.3136(18)  | 0.3041(18)  | 0.0572(9) | 0.033(9)                           |
| O29          | 0.0423(18)  | -0.1828(18) | 0.2966(9) | 0.034(9)                           |
| O30          | 0.4338(15)  | 0.1243(16)  | 0.1734(8) | 0.017(7)                           |
| O31          | -0.1763(15) | 0.2878(16)  | 0.2230(8) | 0.016(7)                           |
| O32          | 0.1653(15)  | -0.0120(15) | 0.1149(7) | 0.011(7)                           |
| O33          | -0.1348(15) | 0.2018(15)  | 0.0525(8) | 0.013(7)                           |
| O34          | -0.1308(18) | 0.1148(19)  | 0.2668(9) | 0.040(10)                          |
| O35          | 0.3548(16)  | -0.1210(17) | 0.4250(8) | 0.025(8)                           |
| O36          | 0.1324(18)  | 0.3721(18)  | 0.3094(9) | 0.035(9)                           |
| O37          | -0.1266(16) | 0.4108(16)  | 0.1340(8) | 0.020(8)                           |
| O38          | 0.3069(16)  | 0.2699(16)  | 0.1854(8) | 0.019(8)                           |
| O39          | 0.4246(15)  | 0.1692(15)  | 0.0210(8) | 0.014(7)                           |
| O40          | 0.3854(16)  | -0.0409(16) | 0.0152(8) | 0.018(7)                           |
| O41          | 0.0338(19)  | 0.3081(19)  | 0.3571(9) | 0.042(10)                          |
| O42          | 0.2044(17)  | 0.0241(17)  | 0.0351(9) | 0.030(9)                           |
| O43          | 0.4467(16)  | 0.0047(16)  | 0.0745(8) | 0.024(8)                           |
| O44          | 0.6565(18)  | -0.2041(18) | 0.2581(9) | 0.034(9)                           |
| O45          | 0.0131(16)  | -0.1507(16) | 0.2548(8) | 0.021(8)                           |
| O46          | 0.0427(16)  | 0.2865(16)  | 0.1314(8) | 0.021(8)                           |
| O47          | 0.5138(16)  | 0.1011(16)  | 0.0992(8) | 0.017(7)                           |
| O48          | -0.1013(18) | 0.3452(18)  | 0.2680(9) | 0.037(9)                           |
| O49          | 0.2542(15)  | 0.2509(15)  | 0.2722(8) | 0.015(7)                           |
| O50          | -0.1872(18) | 0.3198(18)  | 0.1787(9) | 0.036(9)                           |

Table S2 - Final Coordinates and Equivalent Isotropic Displacement  
Parameters of the non-Hydrogen atoms (continued)  
For U28a

| Atom | x           | y           | z          | U(eq) [Ang <sup>2</sup> ] |
|------|-------------|-------------|------------|---------------------------|
| ---- | ---         | ---         | ---        | -----                     |
| O51  | 0.6407(17)  | -0.1755(17) | 0.2163(9)  | 0.028(8)                  |
| O52  | -0.0407(15) | 0.2988(15)  | 0.0584(7)  | 0.012(7)                  |
| O53  | 0.4954(15)  | -0.1937(15) | 0.2443(8)  | 0.014(7)                  |
| O54  | 0.661(2)    | -0.113(2)   | 0.3053(10) | 0.056(11)                 |
| O55  | 0.2425(17)  | 0.4493(18)  | 0.2782(9)  | 0.032(9)                  |
| O56  | -0.1051(18) | 0.3243(18)  | 0.0837(9)  | 0.035(9)                  |
| O57  | 0.1191(17)  | -0.1456(17) | 0.1159(8)  | 0.024(8)                  |
| O58  | 0.3417(15)  | 0.1373(15)  | 0.1085(7)  | 0.011(7)                  |
| O59  | -0.0889(15) | 0.4757(15)  | 0.0578(8)  | 0.016(7)                  |
| O60  | 0.2110(15)  | 0.2813(15)  | 0.1203(7)  | 0.012(7)                  |
| O61  | 0.3092(19)  | 0.192(2)    | 0.4132(9)  | 0.045(10)                 |
| O62  | -0.0147(17) | 0.2816(17)  | 0.2051(8)  | 0.028(8)                  |
| O63  | 0.6908(16)  | -0.3612(16) | 0.2293(8)  | 0.020(8)                  |
| O64  | 0.2365(15)  | -0.1605(15) | 0.1751(8)  | 0.016(7)                  |
| O65  | 0.0999(17)  | -0.0281(17) | 0.3562(9)  | 0.031(9)                  |
| O66  | 0.1860(15)  | -0.1798(15) | 0.2637(7)  | 0.011(7)                  |
| O67  | 0.1193(15)  | 0.1311(15)  | 0.3612(7)  | 0.011(7)                  |
| O68  | 0.7280(15)  | -0.0906(15) | 0.2355(8)  | 0.016(7)                  |
| O69  | -0.0784(16) | 0.4476(16)  | 0.1427(8)  | 0.024(8)                  |
| O70  | 0.4740(17)  | -0.2572(17) | 0.3313(9)  | 0.031(9)                  |
| O71  | 0.2516(18)  | 0.2838(18)  | 0.0402(9)  | 0.033(9)                  |
| O72  | -0.081(2)   | 0.020(2)    | 0.3325(10) | 0.049(10)                 |
| O73  | 0.0592(17)  | 0.4389(17)  | 0.1081(8)  | 0.027(8)                  |
| O74  | 0.3024(16)  | -0.2493(16) | 0.3405(8)  | 0.021(8)                  |
| O75  | -0.1351(17) | -0.0509(18) | 0.2848(9)  | 0.033(9)                  |
| O76  | 0.0441(17)  | -0.0193(17) | 0.2757(8)  | 0.029(8)                  |



Table S2 - Final Coordinates and Equivalent Isotropic Displacement  
Parameters of the non-Hydrogen atoms (continued)  
For U28a

| Atom<br>---- | x<br>---    | y<br>---    | z<br>---   | U(eq) [Ang^2]<br>----- |
|--------------|-------------|-------------|------------|------------------------|
| O77          | 0.3871(19)  | -0.1688(19) | 0.1668(10) | 0.046(10)              |
| O78          | 0.5218(16)  | -0.0419(16) | 0.2466(8)  | 0.021(8)               |
| O79          | 0.2120(16)  | 0.4367(16)  | 0.1280(8)  | 0.021(8)               |
| O80          | 0.1515(15)  | 0.4674(15)  | 0.0420(7)  | 0.013(7)               |
| O81          | 0.279(2)    | 0.056(2)    | 0.4024(10) | 0.052(11)              |
| O82          | 0.5268(17)  | -0.3421(17) | 0.1320(8)  | 0.030(9)               |
| O83          | 0.3738(18)  | -0.3254(18) | 0.1714(9)  | 0.036(9)               |
| O84          | 0.1021(17)  | 0.4197(18)  | 0.2655(9)  | 0.032(9)               |
| O85          | -0.056(2)   | 0.464(2)    | 0.2965(10) | 0.054(11)              |
| O86          | 0.3547(16)  | 0.1160(17)  | 0.3484(8)  | 0.025(8)               |
| O87          | 0.2687(19)  | -0.3602(19) | 0.3041(9)  | 0.044(10)              |
| O88          | 0.3704(19)  | 0.2745(19)  | 0.3178(9)  | 0.044(10)              |
| O89          | 0.3395(17)  | 0.4492(17)  | 0.1687(8)  | 0.029(8)               |
| O90          | 0.5000(17)  | -0.0440(18) | 0.3346(9)  | 0.033(9)               |
| O91          | 0.0744(18)  | -0.0339(18) | 0.0342(9)  | 0.038(9)               |
| O92          | 0.272(2)    | -0.180(2)   | 0.4818(10) | 0.059(11)              |
| O93          | -0.2500(17) | 0.1928(18)  | 0.1951(9)  | 0.033(9)               |
| O94          | -0.2061(17) | 0.4704(17)  | 0.1980(8)  | 0.030(9)               |
| O95          | 0.0862(18)  | 0.2531(19)  | 0.2826(9)  | 0.042(10)              |
| O96          | 0.202(2)    | -0.325(2)   | 0.3284(11) | 0.072(13)              |
| O97          | 0.149(2)    | 0.196(2)    | 0.4244(10) | 0.053(11)              |
| O98          | 0.4710(17)  | -0.1642(17) | 0.0959(8)  | 0.028(8)               |
| O99          | 0.2444(17)  | -0.1687(18) | 0.3992(9)  | 0.033(9)               |
| O100         | 0.4897(18)  | -0.1796(18) | 0.3852(9)  | 0.036(9)               |
| O101         | 0.6095(17)  | 0.1488(17)  | 0.1455(8)  | 0.030(9)               |
| O102         | 0.222(2)    | -0.319(2)   | 0.4005(10) | 0.055(11)              |

Table S2 - Final Coordinates and Equivalent Isotropic Displacement  
Parameters of the non-Hydrogen atoms (continued)  
For U28a

| Atom | x           | y           | z          | U(eq) [Ang <sup>2</sup> ] |
|------|-------------|-------------|------------|---------------------------|
| ---- | ---         | ---         | ---        | -----                     |
| O103 | 0.4709(17)  | 0.2597(17)  | 0.1868(9)  | 0.031(9)                  |
| O105 | 0.6318(19)  | -0.020(2)   | 0.2920(10) | 0.048(10)                 |
| O106 | 0.298(2)    | 0.287(2)    | 0.3391(11) | 0.062(12)                 |
| O107 | -0.0253(19) | -0.0782(19) | 0.3485(10) | 0.045(10)                 |
| O108 | 0.651(2)    | -0.193(2)   | 0.3801(12) | 0.081(14)                 |
| O109 | 0.455(2)    | 0.205(3)    | 0.3944(12) | 0.092(15)                 |
| O110 | 0.349(2)    | -0.467(2)   | 0.3801(11) | 0.074(13)                 |
| O111 | -0.032(2)   | 0.290(2)    | 0.3408(10) | 0.054(11)                 |
| O112 | 0.524(2)    | 0.098(2)    | 0.3329(11) | 0.065(12)                 |
| O113 | -0.1325(18) | 0.1371(19)  | 0.1381(9)  | 0.040(9)                  |
| O115 | -0.017(2)   | 0.214(2)    | 0.4270(11) | 0.064(12)                 |
| O118 | -0.057(2)   | -0.013(2)   | 0.4227(11) | 0.066(12)                 |
| O119 | 0.418(2)    | -0.210(2)   | 0.5262(11) | 0.068(12)                 |
| O120 | 0.446(2)    | -0.404(2)   | 0.3259(12) | 0.082(14)                 |
| O121 | 0.618(2)    | -0.477(2)   | 0.3637(11) | 0.070(13)                 |
| O122 | 0.577(2)    | -0.379(2)   | 0.2833(11) | 0.074(13)                 |
| O123 | 0.505(2)    | 0.008(2)    | 0.3994(12) | 0.090(15)                 |
| O124 | 0.144(2)    | 0.114(2)    | 0.4488(12) | 0.079(13)                 |
| O125 | 0.576(2)    | -0.368(2)   | 0.4097(11) | 0.074(13)                 |
| O126 | 0.083(2)    | 0.032(2)    | 0.4247(12) | 0.086(14)                 |
| O127 | 0.091(2)    | -0.170(2)   | 0.4118(10) | 0.055(11)                 |
| O128 | -0.028(2)   | 0.127(2)    | 0.3685(11) | 0.074(13)                 |
| O129 | 0.393(2)    | -0.041(2)   | 0.4800(10) | 0.058(11)                 |
| O130 | 0.610(2)    | -0.144(2)   | 0.4131(11) | 0.068(12)                 |
| O131 | 0.629(2)    | -0.339(2)   | 0.3016(12) | 0.089(15)                 |
| O132 | 0.682(2)    | -0.043(2)   | 0.3736(12) | 0.084(14)                 |

Table S2 - Final Coordinates and Equivalent Isotropic Displacement  
Parameters of the non-Hydrogen atoms (continued)  
For U28a

| Atom<br>---- | x<br>---    | y<br>---    | z<br>---   | U(eq) [Ang <sup>2</sup> ]<br>----- |
|--------------|-------------|-------------|------------|------------------------------------|
| O133         | 0.677(2)    | -0.329(2)   | 0.4543(10) | 0.054(11)                          |
| O134         | 0.106(3)    | -0.130(3)   | 0.4468(14) | 0.118(18)                          |
| O135         | 0.271(2)    | 0.130(2)    | 0.4886(11) | 0.065(12)                          |
| O136         | 0.286(2)    | -0.042(2)   | 0.4843(12) | 0.079(13)                          |
| O137         | 0.507(2)    | -0.279(2)   | 0.4643(12) | 0.088(15)                          |
| O138         | 0.385(3)    | 0.105(3)    | 0.4314(12) | 0.090(15)                          |
| O139         | 0.448(3)    | -0.376(3)   | 0.3927(15) | 0.127(19)                          |
| O140         | 0.342(2)    | -0.270(2)   | 0.4785(11) | 0.064(12)                          |
| O141         | 0.209(2)    | -0.306(2)   | 0.4799(11) | 0.070(13)                          |
| O142         | 0.631(2)    | -0.340(2)   | 0.3796(12) | 0.079(13)                          |
| O143         | 0.521(2)    | -0.178(2)   | 0.4620(11) | 0.077(13)                          |
| O144         | 0.316(3)    | -0.350(3)   | 0.4219(13) | 0.107(17)                          |
| Na5          | 0.1672(12)  | -0.1243(12) | 0.3211(6)  | 0.044(6)                           |
| Na6          | 0.2140(11)  | 0.1678(11)  | 0.3276(5)  | 0.037(5)                           |
| Na7          | 0.2150(11)  | -0.0273(11) | 0.3911(6)  | 0.042(6)                           |
| Na8          | 0.4964(12)  | -0.1407(12) | 0.2998(6)  | 0.046(6)                           |
| Na9          | 0.3780(12)  | -0.2051(12) | 0.3755(6)  | 0.045(6)                           |
| Na10         | 0.6546(13)  | -0.4096(13) | 0.0543(6)  | 0.059(7)                           |
| Na11         | -0.2521(12) | 0.3685(12)  | -0.0398(6) | 0.048(6)                           |
| Na12         | -0.3430(14) | 0.2111(14)  | 0.0327(7)  | 0.074(8)                           |
| Na13         | -0.2683(13) | 0.6952(13)  | 0.0834(7)  | 0.064(7)                           |
| Na14         | 0.0588(14)  | 0.6999(14)  | 0.0613(7)  | 0.075(8)                           |
| S1           | 0.2849(8)   | -0.0203(8)  | 0.3034(4)  | 0.036(5)                           |
| O104         | 0.3112(18)  | -0.0560(18) | 0.3433(9)  | 0.037(9)                           |

Table S2 - Final Coordinates and Equivalent Isotropic Displacement  
Parameters of the non-Hydrogen atoms (continued)  
For U28a

| Atom<br>---- | x<br>---    | y<br>---    | z<br>---    | U(eq) [Ang^2]<br>----- |
|--------------|-------------|-------------|-------------|------------------------|
| O114         | 0.246(2)    | 0.072(2)    | 0.2944(10)  | 0.051(11)              |
| O116         | 0.362(2)    | -0.060(2)   | 0.2840(10)  | 0.060(11)              |
| O117         | 0.230(2)    | -0.052(2)   | 0.2934(11)  | 0.066(12)              |
| O145         | 0.1999(18)  | 0.1182(19)  | 0.1421(9)   | 0.040(10)              |
| O146         | 0.169(2)    | 0.211(2)    | 0.2063(11)  | 0.068(12)              |
| O147         | 0.143(2)    | 0.009(2)    | 0.2055(11)  | 0.065(12)              |
| O148         | 0.362(2)    | -0.005(2)   | 0.1905(12)  | 0.082(14)              |
| O149         | 0.7659(16)  | -0.3789(17) | 0.0337(8)   | 0.024(8)               |
| O150         | 0.7200(19)  | -0.440(2)   | 0.1193(10)  | 0.050(10)              |
| O151         | -0.004(2)   | 0.141(2)    | -0.0162(10) | 0.055(11)              |
| O152         | -0.2911(18) | 0.3163(18)  | 0.0184(9)   | 0.036(9)               |
| O153         | 0.0157(19)  | 0.7953(19)  | 0.1021(10)  | 0.048(10)              |
| O154         | -0.2183(19) | 0.1148(19)  | 0.0127(9)   | 0.043(10)              |
| O155         | 0.1298(16)  | 0.6317(17)  | 0.0142(8)   | 0.025(8)               |

Table S2 - Final Coordinates and Equivalent Isotropic Displacement  
Parameters of the non-Hydrogen atoms (continued)  
For U28a

| Atom | x           | y           | z           | U(eq) [Ang <sup>2</sup> ] |
|------|-------------|-------------|-------------|---------------------------|
| ---- | ---         | ---         | ---         | -----                     |
| O156 | -0.4635(19) | 0.288(2)    | 0.0555(10)  | 0.048(10)                 |
| O157 | -0.136(2)   | 0.617(2)    | 0.1232(10)  | 0.052(11)                 |
| O158 | 0.5897(18)  | -0.2599(19) | 0.0551(9)   | 0.042(10)                 |
| O159 | -0.270(2)   | 0.137(2)    | 0.1006(10)  | 0.051(10)                 |
| O160 | 0.610(2)    | -0.370(2)   | -0.0114(10) | 0.054(11)                 |
| O161 | 0.1861(19)  | 0.6004(19)  | 0.0972(10)  | 0.046(10)                 |
| O162 | -0.418(2)   | 0.259(2)    | -0.0280(11) | 0.077(13)                 |
| O163 | 0.549(2)    | -0.436(2)   | 0.0812(10)  | 0.056(11)                 |
| O164 | -0.372(2)   | 0.090(2)    | 0.0529(10)  | 0.059(11)                 |
| O165 | -0.3248(19) | 0.508(2)    | -0.0526(10) | 0.049(10)                 |
| O166 | 0.026(2)    | 0.600(2)    | 0.1093(12)  | 0.091(15)                 |
| O167 | -0.167(2)   | 0.226(2)    | -0.0385(11) | 0.067(12)                 |
| O168 | -0.230(2)   | 0.793(2)    | 0.0388(11)  | 0.077(13)                 |
| O169 | -0.061(2)   | 0.724(2)    | 0.0233(12)  | 0.088(14)                 |
| O170 | -0.351(2)   | 0.352(2)    | -0.0747(11) | 0.075(13)                 |
| O171 | 0.739(3)    | -0.558(3)   | 0.0554(13)  | 0.099(16)                 |
| O172 | 0.376(3)    | 0.097(3)    | 0.2605(13)  | 0.095(15)                 |
| O173 | 0.823(3)    | -0.344(3)   | 0.2888(14)  | 0.122(19)                 |
| O174 | 0.615(3)    | -0.236(3)   | 0.5276(13)  | 0.096(15)                 |
| O175 | -0.285(3)   | -0.074(3)   | 0.1236(13)  | 0.098(16)                 |
| O176 | 0.0716(15)  | 0.1152(15)  | 0.2807(7)   | 0.011(7)                  |
| O177 | 0.3366(18)  | -0.1806(18) | 0.2567(9)   | 0.037(9)                  |
| O178 | 0.461(2)    | 0.147(2)    | 0.2634(11)  | 0.061(11)                 |
| O179 | 0.5668(17)  | -0.5692(17) | 0.1278(8)   | 0.026(8)                  |
| O180 | 0.4559(19)  | 0.5112(19)  | 0.1650(10)  | 0.046(10)                 |
| O181 | 0.043(2)    | -0.030(2)   | 0.1769(11)  | 0.059(11)                 |

Table S2 - Final Coordinates and Equivalent Isotropic Displacement  
Parameters of the non-Hydrogen atoms (continued)  
For U28a

| Atom | x           | y           | z          | U(eq) [Ang <sup>2</sup> ] |
|------|-------------|-------------|------------|---------------------------|
| ---- | ---         | ---         | ---        | -----                     |
| O182 | 0.104(2)    | 0.371(2)    | 0.1856(11) | 0.064(12)                 |
| O183 | -0.0127(19) | 0.5716(19)  | 0.0196(9)  | 0.044(10)                 |
| O184 | 0.495(2)    | -0.054(2)   | 0.1482(11) | 0.061(12)                 |
| O185 | -0.2296(19) | 0.0149(19)  | 0.0804(9)  | 0.043(10)                 |
| O186 | -0.053(3)   | 0.179(3)    | 0.2931(13) | 0.097(15)                 |
| O187 | 0.5674(19)  | 0.4108(19)  | 0.2152(9)  | 0.042(10)                 |
| O188 | 0.700(2)    | 0.103(2)    | 0.2558(11) | 0.062(12)                 |
| O189 | 0.9047(19)  | -0.2166(19) | 0.2504(9)  | 0.046(10)                 |
| O190 | 0.484(2)    | -0.599(2)   | 0.1010(11) | 0.063(12)                 |
| O191 | 0.783(2)    | 0.005(2)    | 0.1839(12) | 0.079(14)                 |
| O192 | 0.142(2)    | 0.194(2)    | 0.0516(11) | 0.063(12)                 |
| O193 | -0.178(3)   | -0.087(3)   | 0.0407(13) | 0.093(15)                 |
| O194 | 0.554(2)    | -0.032(2)   | 0.4716(11) | 0.071(13)                 |

Table S2 - Final Coordinates and Equivalent Isotropic Displacement  
Parameters of the non-Hydrogen atoms (continued)  
For U28a

| Atom | x          | y           | z           | U(eq) [Ang <sup>2</sup> ] |
|------|------------|-------------|-------------|---------------------------|
| ---- | ---        | ---         | ---         | -----                     |
| O195 | 0.414(3)   | 0.067(3)    | -0.0380(14) | 0.112(17)                 |
| O196 | 0.331(2)   | -0.487(2)   | 0.2333(11)  | 0.074(13)                 |
| O197 | 0.914(3)   | -0.318(3)   | 0.2215(13)  | 0.093(15)                 |
| O198 | -0.025(3)  | 0.780(3)    | 0.1767(14)  | 0.117(18)                 |
| O199 | 0.783(2)   | -0.229(2)   | 0.1795(12)  | 0.090(15)                 |
| O200 | -0.176(2)  | -0.173(2)   | 0.3218(12)  | 0.089(15)                 |
| Na1  | 0.2622(9)  | -0.0433(9)  | 0.1668(4)   | 0.008(4)                  |
| Na2  | 0.2941(9)  | 0.1517(9)   | 0.1706(5)   | 0.013(4)                  |
| Na3  | 0.0828(10) | 0.1599(10)  | 0.1832(5)   | 0.023(5)                  |
| Na4  | 0.4023(11) | -0.0357(11) | 0.3791(5)   | 0.034(5)                  |

U(eq) = 1/3 of the trace of the orthogonalized U Tensor

Table S3 - (An)isotropic Displacement Parameters  
For U28a

| Atom | U(1,1) or U | U(2,2)     | U(3,3)     | U(2,3)      | U(1,3)      | U(1,2)      |
|------|-------------|------------|------------|-------------|-------------|-------------|
| U1   | 0.0161(11)  | 0.0173(11) | 0.0295(13) | -0.0049(10) | 0.0000(10)  | -0.0092(9)  |
| U2   | 0.0190(11)  | 0.0188(11) | 0.0309(14) | -0.0056(10) | 0.0030(10)  | -0.0071(9)  |
| U3   | 0.0202(11)  | 0.0155(11) | 0.0291(13) | -0.0058(10) | 0.0008(10)  | -0.0104(9)  |
| U4   | 0.0159(10)  | 0.0133(10) | 0.0260(13) | -0.0031(9)  | 0.0012(9)   | -0.0082(9)  |
| U5   | 0.0313(12)  | 0.0187(11) | 0.0293(13) | -0.0088(10) | 0.0029(10)  | -0.0167(10) |
| U6   | 0.0171(11)  | 0.0157(10) | 0.0254(13) | -0.0051(9)  | 0.0029(9)   | -0.0089(9)  |
| U7   | 0.0308(12)  | 0.0198(11) | 0.0279(13) | -0.0044(10) | 0.0015(10)  | -0.0164(10) |
| U8   | 0.0176(11)  | 0.0268(12) | 0.0320(14) | -0.0042(10) | 0.0032(10)  | -0.0125(10) |
| U9   | 0.0182(11)  | 0.0221(11) | 0.0259(13) | -0.0013(10) | -0.0029(10) | -0.0119(9)  |
| U10  | 0.0147(10)  | 0.0174(11) | 0.0250(13) | -0.0001(9)  | -0.0018(9)  | -0.0076(9)  |
| U11  | 0.0267(12)  | 0.0184(11) | 0.0313(14) | -0.0114(10) | 0.0086(10)  | -0.0121(10) |
| U12  | 0.0258(11)  | 0.0212(11) | 0.0272(13) | -0.0110(10) | 0.0084(10)  | -0.0151(10) |
| U13  | 0.0272(12)  | 0.0217(11) | 0.0233(13) | -0.0068(10) | 0.0001(10)  | -0.0158(10) |
| U14  | 0.0270(12)  | 0.0209(11) | 0.0300(13) | -0.0108(10) | 0.0010(10)  | -0.0120(10) |
| U15  | 0.0246(11)  | 0.0278(12) | 0.0292(13) | -0.0045(10) | 0.0034(10)  | -0.0168(10) |
| U16  | 0.0150(11)  | 0.0240(12) | 0.0382(14) | -0.0061(10) | -0.0035(10) | -0.0069(9)  |
| U17  | 0.0222(11)  | 0.0183(11) | 0.0374(14) | -0.0078(10) | -0.0019(10) | -0.0048(10) |
| U18  | 0.0307(12)  | 0.0220(11) | 0.0351(14) | -0.0137(10) | 0.0090(11)  | -0.0122(10) |
| U19  | 0.0411(14)  | 0.0393(13) | 0.0303(14) | -0.0076(11) | 0.0076(11)  | -0.0214(12) |
| U20  | 0.0407(14)  | 0.0442(14) | 0.0362(15) | -0.0132(12) | -0.0029(12) | -0.0223(12) |
| U21  | 0.0508(15)  | 0.0280(13) | 0.0325(15) | -0.0024(11) | -0.0025(12) | -0.0153(11) |
| U22  | 0.0394(13)  | 0.0442(14) | 0.0319(15) | -0.0139(12) | 0.0083(11)  | -0.0193(12) |
| U23  | 0.0370(13)  | 0.0272(13) | 0.0419(16) | -0.0026(11) | -0.0055(12) | -0.0097(11) |
| U24  | 0.0370(13)  | 0.0426(14) | 0.0421(16) | -0.0105(12) | -0.0101(12) | -0.0160(12) |
| U25  | 0.0553(15)  | 0.0449(15) | 0.0359(15) | -0.0166(12) | 0.0000(12)  | -0.0228(13) |
| U26  | 0.0426(14)  | 0.0417(14) | 0.0409(16) | -0.0051(12) | -0.0107(12) | -0.0102(12) |



Table S3 - (An)isotropic Displacement Parameters (continued)  
For U28a

| Atom | U(1,1) or U | U(2,2)     | U(3,3)     | U(2,3)      | U(1,3)      | U(1,2)      |
|------|-------------|------------|------------|-------------|-------------|-------------|
| U27  | 0.0567(16)  | 0.0481(15) | 0.0351(16) | -0.0025(12) | 0.0005(13)  | -0.0266(13) |
| U28  | 0.0684(17)  | 0.0495(15) | 0.0296(15) | -0.0043(12) | -0.0103(13) | -0.0243(14) |
| S1   | 0.028(8)    | 0.026(8)   | 0.050(11)  | -0.011(8)   | 0.002(8)    | -0.010(7)   |

=====

The Temperature Factor has the Form of  $\text{Exp}(-T)$  Where  
 $T = 8 \cdot (\pi^2) \cdot U \cdot (\sin(\theta) / \lambda)^2$  for Isotropic Atoms  
 $T = 2 \cdot (\pi^2) \cdot \sum_{ij} h(i) \cdot h(j) \cdot U(i,j) \cdot A^*(i) \cdot A^*(j)$ , for  
Anisotropic Atoms.  $A^*(i)$  are Reciprocal Axial Lengths and  
 $h(i)$  are the Reflection Indices.

Table S4 - Bond Distances (Angstrom)  
For U28a

|    |       |         |    |      |         |
|----|-------|---------|----|------|---------|
| U1 | -O7   | 2.31(3) | U4 | -O71 | 2.41(3) |
| U1 | -O9   | 2.38(3) | U4 | -O73 | 2.42(3) |
| U1 | -O10  | 2.41(3) | U4 | -O79 | 2.47(3) |
| U1 | -O14  | 2.36(3) | U4 | -O80 | 1.86(3) |
| U1 | -O30  | 1.83(3) | U5 | -O5  | 2.43(3) |
| U1 | -O47  | 2.44(3) | U5 | -O11 | 2.38(3) |
| U1 | -O101 | 1.78(3) | U5 | -O13 | 2.36(3) |
| U1 | -O103 | 2.49(3) | U5 | -O22 | 2.33(3) |
| U2 | -O8   | 2.45(3) | U5 | -O25 | 1.85(3) |
| U2 | -O31  | 2.43(3) | U5 | -O57 | 2.35(3) |
| U2 | -O37  | 2.36(3) | U5 | -O64 | 1.79(3) |
| U2 | -O48  | 2.36(3) | U5 | -O83 | 2.36(4) |
| U2 | -O50  | 2.34(3) | U6 | -O6  | 2.36(3) |
| U2 | -O62  | 1.80(3) | U6 | -O7  | 2.37(3) |
| U2 | -O69  | 2.47(3) | U6 | -O28 | 2.40(3) |
| U2 | -O94  | 1.82(3) | U6 | -O39 | 1.81(3) |
| U3 | -O3   | 2.42(3) | U6 | -O43 | 2.41(3) |
| U3 | -O9   | 2.34(3) | U6 | -O47 | 2.40(3) |
| U3 | -O12  | 2.31(3) | U6 | -O58 | 1.76(3) |
| U3 | -O23  | 2.34(3) | U6 | -O71 | 2.45(3) |
| U3 | -O38  | 1.73(3) | U7 | -O5  | 2.34(3) |
| U3 | -O79  | 2.36(3) | U7 | -O11 | 2.38(3) |
| U3 | -O89  | 1.86(3) | U7 | -O27 | 1.86(3) |
| U3 | -O103 | 2.42(3) | U7 | -O29 | 2.43(3) |
| U4 | -O1   | 2.34(3) | U7 | -O45 | 2.41(3) |
| U4 | -O23  | 2.31(3) | U7 | -O66 | 1.80(3) |
| U4 | -O28  | 2.39(3) | U7 | -O87 | 2.33(3) |
| U4 | -O60  | 1.76(3) | U7 | -O96 | 2.40(4) |

Table S4 - Bond Distances (Angstrom) (continued)  
For U28a

|     |       |         |     |       |         |
|-----|-------|---------|-----|-------|---------|
| U8  | -O2   | 2.40(3) | U11 | -O77  | 1.81(3) |
| U8  | -O20  | 2.35(3) | U11 | -O82  | 1.79(3) |
| U8  | -O21  | 1.74(3) | U11 | -O83  | 2.47(4) |
| U8  | -O31  | 2.42(3) | U11 | -O98  | 2.33(3) |
| U8  | -O34  | 2.49(3) | U12 | -O6   | 2.42(3) |
| U8  | -O50  | 2.42(3) | U12 | -O15  | 2.36(3) |
| U8  | -O93  | 1.82(4) | U12 | -O17  | 1.77(2) |
| U8  | -O113 | 2.35(3) | U12 | -O24  | 2.38(3) |
| U9  | -O4   | 2.40(3) | U12 | -O40  | 1.81(3) |
| U9  | -O16  | 2.34(3) | U12 | -O42  | 2.48(3) |
| U9  | -O20  | 2.32(3) | U12 | -O43  | 2.33(3) |
| U9  | -O26  | 1.79(3) | U12 | -O98  | 2.48(3) |
| U9  | -O33  | 1.82(3) | U13 | -O4   | 2.38(3) |
| U9  | -O52  | 2.45(3) | U13 | -O13  | 2.35(3) |
| U9  | -O56  | 2.40(3) | U13 | -O15  | 2.42(3) |
| U9  | -O113 | 2.38(3) | U13 | -O16  | 2.40(3) |
| U10 | -O1   | 2.42(3) | U13 | -O32  | 1.78(3) |
| U10 | -O37  | 2.29(3) | U13 | -O42  | 2.41(3) |
| U10 | -O46  | 1.79(3) | U13 | -O57  | 2.43(3) |
| U10 | -O52  | 2.38(3) | U13 | -O91  | 1.84(3) |
| U10 | -O56  | 2.28(4) | U14 | -O3   | 2.40(3) |
| U10 | -O59  | 1.84(3) | U14 | -O12  | 2.41(3) |
| U10 | -O69  | 2.33(3) | U14 | -O36  | 2.38(4) |
| U10 | -O73  | 2.38(3) | U14 | -O49  | 1.81(3) |
| U11 | -O18  | 2.39(3) | U14 | -O55  | 1.86(3) |
| U11 | -O19  | 2.30(3) | U14 | -O84  | 2.39(3) |
| U11 | -O22  | 2.44(3) | U14 | -O88  | 2.36(4) |
| U11 | -O24  | 2.35(3) | U14 | -O106 | 2.30(4) |

Table S4 - Bond Distances (Angstrom) (continued)  
For U28a

|     |       |         |     |       |         |
|-----|-------|---------|-----|-------|---------|
| U15 | -O2   | 2.37(3) | U18 | -O84  | 2.44(3) |
| U15 | -O29  | 2.40(3) | U18 | -O85  | 1.82(3) |
| U15 | -O34  | 2.38(3) | U18 | -O95  | 1.92(3) |
| U15 | -O45  | 2.37(3) | U18 | -O111 | 2.38(4) |
| U15 | -O72  | 2.30(4) | U19 | -O65  | 1.87(3) |
| U15 | -O75  | 1.79(4) | U19 | -O72  | 2.51(4) |
| U15 | -O76  | 1.85(3) | U19 | -O107 | 2.37(4) |
| U15 | -O107 | 2.38(4) | U19 | -O118 | 1.86(4) |
| U16 | -O10  | 2.34(3) | U19 | -O126 | 2.42(4) |
| U16 | -O14  | 2.44(3) | U19 | -O127 | 2.38(3) |
| U16 | -O44  | 2.26(3) | U19 | -O128 | 2.38(4) |
| U16 | -O51  | 2.30(3) | U19 | -O134 | 2.49(5) |
| U16 | -O54  | 2.30(4) | U20 | -O61  | 2.36(4) |
| U16 | -O68  | 1.78(3) | U20 | -O86  | 1.80(3) |
| U16 | -O78  | 1.77(3) | U20 | -O88  | 2.34(3) |
| U16 | -O105 | 2.28(4) | U20 | -O106 | 2.33(4) |
| U17 | -O18  | 2.36(3) | U20 | -O109 | 1.86(5) |
| U17 | -O19  | 2.45(3) | U20 | -O112 | 2.49(4) |
| U17 | -O44  | 2.47(3) | U20 | -O123 | 2.47(4) |
| U17 | -O51  | 2.43(3) | U20 | -O138 | 2.33(5) |
| U17 | -O53  | 1.84(3) | U21 | -O74  | 1.82(3) |
| U17 | -O63  | 1.84(3) | U21 | -O87  | 2.35(3) |
| U17 | -O122 | 2.35(4) | U21 | -O96  | 2.34(4) |
| U17 | -O131 | 2.35(4) | U21 | -O102 | 2.37(4) |
| U18 | -O8   | 2.34(3) | U21 | -O110 | 1.81(4) |
| U18 | -O36  | 2.45(4) | U21 | -O120 | 2.44(4) |
| U18 | -O41  | 2.36(3) | U21 | -O139 | 2.41(6) |
| U18 | -O48  | 2.45(4) | U21 | -O144 | 2.29(5) |

Table S4 - Bond Distances (Angstrom) (continued)  
For U28a

|     |       |         |     |       |         |
|-----|-------|---------|-----|-------|---------|
| U22 | -O41  | 2.37(3) | U25 | -O129 | 2.41(4) |
| U22 | -O67  | 1.78(3) | U25 | -O135 | 1.88(4) |
| U22 | -O97  | 2.41(4) | U25 | -O136 | 2.39(4) |
| U22 | -O111 | 2.34(4) | U25 | -O138 | 2.26(6) |
| U22 | -O115 | 1.78(4) | U26 | -O100 | 1.87(3) |
| U22 | -O124 | 2.38(4) | U26 | -O108 | 2.31(4) |
| U22 | -O126 | 2.43(4) | U26 | -O125 | 2.31(4) |
| U22 | -O128 | 2.31(4) | U26 | -O130 | 2.27(4) |
| U23 | -O70  | 1.83(3) | U26 | -O133 | 1.88(4) |
| U23 | -O120 | 2.40(4) | U26 | -O137 | 2.28(4) |
| U23 | -O121 | 1.76(4) | U26 | -O142 | 2.29(4) |
| U23 | -O122 | 2.38(4) | U26 | -O143 | 2.31(4) |
| U23 | -O125 | 2.42(4) | U27 | -O92  | 2.42(4) |
| U23 | -O131 | 2.37(4) | U27 | -O99  | 1.82(3) |
| U23 | -O139 | 2.51(6) | U27 | -O102 | 2.37(4) |
| U23 | -O142 | 2.35(4) | U27 | -O127 | 2.32(4) |
| U24 | -O54  | 2.41(4) | U27 | -O134 | 2.25(5) |
| U24 | -O90  | 1.83(3) | U27 | -O140 | 2.34(4) |
| U24 | -O105 | 2.36(4) | U27 | -O141 | 1.85(4) |
| U24 | -O108 | 2.35(4) | U27 | -O144 | 2.26(5) |
| U24 | -O112 | 2.31(4) | U28 | -O35  | 1.83(3) |
| U24 | -O123 | 2.39(4) | U28 | -O92  | 2.26(4) |
| U24 | -O130 | 2.38(4) | U28 | -O119 | 1.79(4) |
| U24 | -O132 | 1.88(4) | U28 | -O129 | 2.44(4) |
| U25 | -O61  | 2.38(4) | U28 | -O136 | 2.30(4) |
| U25 | -O81  | 1.83(3) | U28 | -O137 | 2.37(4) |
| U25 | -O97  | 2.25(4) | U28 | -O140 | 2.41(4) |
| U25 | -O124 | 2.25(4) | U28 | -O143 | 2.46(4) |

Table S4 - Bond Distances (Angstrom) (continued)  
For U28a

|     |       |         |      |       |         |
|-----|-------|---------|------|-------|---------|
| S1  | -O117 | 1.48(4) | O37  | -O69  | 1.44(4) |
| S1  | -O116 | 1.53(4) | O41  | -O111 | 1.57(5) |
| S1  | -O104 | 1.43(3) | O44  | -O51  | 1.47(4) |
| S1  | -O114 | 1.47(4) | O52  | -O56  | 1.47(4) |
| O7  | -O47  | 1.47(4) | O54  | -O105 | 1.50(5) |
| O9  | -O103 | 1.53(4) | O61  | -O138 | 1.56(6) |
| O13 | -O57  | 1.41(5) | O72  | -O107 | 1.58(5) |
| O15 | -O42  | 1.57(4) | O87  | -O96  | 1.50(5) |
| O20 | -O113 | 1.42(4) | O88  | -O106 | 1.50(5) |
| O22 | -O83  | 1.54(4) | O92  | -O140 | 1.61(5) |
| O23 | -O79  | 1.46(4) | O97  | -O124 | 1.61(5) |
| O24 | -O98  | 1.55(5) | O102 | -O144 | 1.70(7) |
| O28 | -O71  | 1.55(5) | O108 | -O130 | 1.65(5) |
| O29 | -O45  | 1.50(4) | O122 | -O131 | 1.69(6) |
| O31 | -O50  | 1.56(4) | O125 | -O142 | 1.65(6) |
| O36 | -O84  | 1.59(4) | O127 | -O134 | 1.71(6) |

Table S5 - Bond Angles (Degrees)  
For U28a

|      |     |       |           |     |     |      |           |
|------|-----|-------|-----------|-----|-----|------|-----------|
| O7   | -U1 | -O9   | 71.3(10)  | O8  | -U2 | -O31 | 141.1(10) |
| O7   | -U1 | -O10  | 110.2(10) | O8  | -U2 | -O37 | 111.1(11) |
| O7   | -U1 | -O14  | 179.2(11) | O8  | -U2 | -O48 | 68.5(11)  |
| O7   | -U1 | -O30  | 93.3(12)  | O8  | -U2 | -O50 | 178.2(11) |
| O7   | -U1 | -O47  | 35.9(10)  | O8  | -U2 | -O62 | 84.1(13)  |
| O7   | -U1 | -O101 | 90.1(13)  | O8  | -U2 | -O69 | 76.7(10)  |
| O7   | -U1 | -O103 | 107.9(10) | O8  | -U2 | -O94 | 93.3(13)  |
| O9   | -U1 | -O10  | 174.6(11) | O31 | -U2 | -O37 | 107.6(10) |
| O9   | -U1 | -O14  | 109.2(10) | O31 | -U2 | -O48 | 73.0(11)  |
| O9   | -U1 | -O30  | 90.8(12)  | O31 | -U2 | -O50 | 38.2(10)  |
| O9   | -U1 | -O47  | 107.1(10) | O31 | -U2 | -O62 | 90.1(12)  |
| O9   | -U1 | -O101 | 91.6(12)  | O31 | -U2 | -O69 | 142.0(10) |
| O9   | -U1 | -O103 | 36.6(10)  | O31 | -U2 | -O94 | 91.9(13)  |
| O10  | -U1 | -O14  | 69.4(10)  | O37 | -U2 | -O48 | 177.1(10) |
| O10  | -U1 | -O30  | 84.0(12)  | O37 | -U2 | -O50 | 69.4(11)  |
| O10  | -U1 | -O47  | 74.4(9)   | O37 | -U2 | -O62 | 93.2(11)  |
| O10  | -U1 | -O101 | 93.6(12)  | O37 | -U2 | -O69 | 34.5(10)  |
| O10  | -U1 | -O103 | 141.6(10) | O37 | -U2 | -O94 | 87.7(11)  |
| O14  | -U1 | -O30  | 87.4(12)  | O48 | -U2 | -O50 | 111.0(12) |
| O14  | -U1 | -O47  | 143.6(10) | O48 | -U2 | -O62 | 89.7(12)  |
| O14  | -U1 | -O101 | 89.3(12)  | O48 | -U2 | -O69 | 145.0(11) |
| O14  | -U1 | -O103 | 72.7(10)  | O48 | -U2 | -O94 | 89.4(12)  |
| O30  | -U1 | -O47  | 91.9(12)  | O50 | -U2 | -O62 | 94.2(13)  |
| O30  | -U1 | -O101 | 176.4(13) | O50 | -U2 | -O69 | 103.9(11) |
| O30  | -U1 | -O103 | 88.5(12)  | O50 | -U2 | -O94 | 88.4(13)  |
| O47  | -U1 | -O101 | 89.9(12)  | O62 | -U2 | -O69 | 90.3(12)  |
| O47  | -U1 | -O103 | 143.7(10) | O62 | -U2 | -O94 | 177.4(16) |
| O101 | -U1 | -O103 | 91.9(12)  | O69 | -U2 | -O94 | 89.1(12)  |

Table S5 - Bond Angles (Degrees) (continued)  
For U28a

|     |     |       |           |     |     |      |           |
|-----|-----|-------|-----------|-----|-----|------|-----------|
| O3  | -U3 | -O9   | 175.3(10) | O1  | -U4 | -O23 | 178.0(11) |
| O3  | -U3 | -O12  | 68.7(10)  | O1  | -U4 | -O28 | 111.5(11) |
| O3  | -U3 | -O23  | 110.1(11) | O1  | -U4 | -O60 | 89.8(12)  |
| O3  | -U3 | -O38  | 82.6(12)  | O1  | -U4 | -O71 | 73.9(11)  |
| O3  | -U3 | -O79  | 74.1(10)  | O1  | -U4 | -O73 | 69.2(10)  |
| O3  | -U3 | -O89  | 91.5(12)  | O1  | -U4 | -O79 | 142.7(10) |
| O3  | -U3 | -O103 | 140.8(10) | O1  | -U4 | -O80 | 86.1(11)  |
| O9  | -U3 | -O12  | 110.0(10) | O23 | -U4 | -O28 | 70.5(11)  |
| O9  | -U3 | -O23  | 71.2(11)  | O23 | -U4 | -O60 | 89.9(12)  |
| O9  | -U3 | -O38  | 92.8(12)  | O23 | -U4 | -O71 | 108.0(12) |
| O9  | -U3 | -O79  | 107.3(10) | O23 | -U4 | -O73 | 108.8(11) |
| O9  | -U3 | -O89  | 93.1(12)  | O23 | -U4 | -O79 | 35.4(11)  |
| O9  | -U3 | -O103 | 37.5(10)  | O23 | -U4 | -O80 | 94.2(12)  |
| O12 | -U3 | -O23  | 178.6(12) | O28 | -U4 | -O60 | 93.2(12)  |
| O12 | -U3 | -O38  | 85.4(12)  | O28 | -U4 | -O71 | 37.6(12)  |
| O12 | -U3 | -O79  | 142.7(10) | O28 | -U4 | -O73 | 179.3(13) |
| O12 | -U3 | -O89  | 89.9(11)  | O28 | -U4 | -O79 | 105.9(11) |
| O12 | -U3 | -O103 | 72.5(11)  | O28 | -U4 | -O80 | 91.0(12)  |
| O23 | -U3 | -O38  | 93.8(12)  | O60 | -U4 | -O71 | 91.0(11)  |
| O23 | -U3 | -O79  | 36.2(11)  | O60 | -U4 | -O73 | 86.8(11)  |
| O23 | -U3 | -O89  | 90.8(12)  | O60 | -U4 | -O79 | 88.3(11)  |
| O23 | -U3 | -O103 | 108.7(11) | O60 | -U4 | -O80 | 175.0(14) |
| O38 | -U3 | -O79  | 93.2(12)  | O71 | -U4 | -O73 | 143.1(12) |
| O38 | -U3 | -O89  | 173.5(13) | O71 | -U4 | -O79 | 143.4(11) |
| O38 | -U3 | -O103 | 89.8(13)  | O71 | -U4 | -O80 | 90.6(11)  |
| O79 | -U3 | -O89  | 87.8(12)  | O73 | -U4 | -O79 | 73.4(11)  |
| O79 | -U3 | -O103 | 144.9(10) | O73 | -U4 | -O80 | 89.1(11)  |
| O89 | -U3 | -O103 | 93.0(13)  | O79 | -U4 | -O80 | 93.3(10)  |



Table S5 - Bond Angles (Degrees) (continued)  
For U28a

|     |     |      |           |     |     |      |           |
|-----|-----|------|-----------|-----|-----|------|-----------|
| O5  | -U5 | -O11 | 67.8(11)  | O6  | -U6 | -O7  | 179.1(9)  |
| O5  | -U5 | -O13 | 110.3(11) | O6  | -U6 | -O28 | 110.3(11) |
| O5  | -U5 | -O22 | 178.1(12) | O6  | -U6 | -O39 | 88.7(11)  |
| O5  | -U5 | -O25 | 92.2(12)  | O6  | -U6 | -O43 | 69.0(10)  |
| O5  | -U5 | -O57 | 75.5(11)  | O6  | -U6 | -O47 | 143.4(9)  |
| O5  | -U5 | -O64 | 84.4(12)  | O6  | -U6 | -O58 | 90.7(11)  |
| O5  | -U5 | -O83 | 141.6(11) | O6  | -U6 | -O71 | 73.2(10)  |
| O11 | -U5 | -O13 | 176.9(11) | O7  | -U6 | -O28 | 70.4(11)  |
| O11 | -U5 | -O22 | 112.3(11) | O7  | -U6 | -O39 | 90.8(12)  |
| O11 | -U5 | -O25 | 86.5(11)  | O7  | -U6 | -O43 | 110.3(10) |
| O11 | -U5 | -O57 | 143.1(11) | O7  | -U6 | -O47 | 35.8(10)  |
| O11 | -U5 | -O64 | 88.5(11)  | O7  | -U6 | -O58 | 89.8(12)  |
| O11 | -U5 | -O83 | 74.0(11)  | O7  | -U6 | -O71 | 107.5(11) |
| O13 | -U5 | -O22 | 69.7(11)  | O28 | -U6 | -O39 | 90.3(11)  |
| O13 | -U5 | -O25 | 91.3(11)  | O28 | -U6 | -O43 | 178.2(11) |
| O13 | -U5 | -O57 | 34.8(11)  | O28 | -U6 | -O47 | 106.2(11) |
| O13 | -U5 | -O64 | 93.7(11)  | O28 | -U6 | -O58 | 91.8(12)  |
| O13 | -U5 | -O83 | 108.1(11) | O28 | -U6 | -O71 | 37.2(12)  |
| O22 | -U5 | -O25 | 89.7(12)  | O39 | -U6 | -O43 | 91.3(11)  |
| O22 | -U5 | -O57 | 104.5(11) | O39 | -U6 | -O47 | 89.1(12)  |
| O22 | -U5 | -O64 | 93.8(12)  | O39 | -U6 | -O58 | 177.9(12) |
| O22 | -U5 | -O83 | 38.4(11)  | O39 | -U6 | -O71 | 92.5(12)  |
| O25 | -U5 | -O57 | 92.6(12)  | O43 | -U6 | -O47 | 74.6(10)  |
| O25 | -U5 | -O64 | 174.7(12) | O43 | -U6 | -O58 | 86.6(11)  |
| O25 | -U5 | -O83 | 89.4(13)  | O43 | -U6 | -O71 | 141.9(11) |
| O57 | -U5 | -O64 | 90.4(12)  | O47 | -U6 | -O58 | 90.1(12)  |
| O57 | -U5 | -O83 | 142.9(11) | O47 | -U6 | -O71 | 143.3(10) |
| O64 | -U5 | -O83 | 90.8(12)  | O58 | -U6 | -O71 | 89.3(12)  |

Table S5 - Bond Angles (Degrees) (continued)  
For U28a

|     |     |      |           |     |     |       |           |
|-----|-----|------|-----------|-----|-----|-------|-----------|
| 05  | -U7 | -011 | 69.3(11)  | O2  | -U8 | -020  | 111.5(10) |
| 05  | -U7 | -027 | 85.3(12)  | O2  | -U8 | -021  | 83.3(11)  |
| 05  | -U7 | -029 | 109.8(11) | O2  | -U8 | -031  | 142.0(9)  |
| 05  | -U7 | -045 | 73.6(11)  | O2  | -U8 | -034  | 68.8(10)  |
| 05  | -U7 | -066 | 95.0(11)  | O2  | -U8 | -050  | 176.4(11) |
| 05  | -U7 | -087 | 139.1(12) | O2  | -U8 | -093  | 93.3(12)  |
| 05  | -U7 | -096 | 172.9(11) | O2  | -U8 | -0113 | 76.4(10)  |
| 011 | -U7 | -027 | 90.3(12)  | O20 | -U8 | -021  | 95.0(12)  |
| 011 | -U7 | -029 | 176.4(11) | O20 | -U8 | -031  | 106.3(10) |
| 011 | -U7 | -045 | 142.7(10) | O20 | -U8 | -034  | 178.2(12) |
| 011 | -U7 | -066 | 90.0(11)  | O20 | -U8 | -050  | 68.6(10)  |
| 011 | -U7 | -087 | 70.2(11)  | O20 | -U8 | -093  | 90.4(13)  |
| 011 | -U7 | -096 | 107.3(11) | O20 | -U8 | -0113 | 35.1(11)  |
| 027 | -U7 | -029 | 93.1(12)  | O21 | -U8 | -031  | 89.6(11)  |
| 027 | -U7 | -045 | 89.6(12)  | O21 | -U8 | -034  | 86.9(13)  |
| 027 | -U7 | -066 | 179.6(13) | O21 | -U8 | -050  | 93.2(12)  |
| 027 | -U7 | -087 | 89.6(13)  | O21 | -U8 | -093  | 174.5(13) |
| 027 | -U7 | -096 | 88.5(13)  | O21 | -U8 | -0113 | 92.3(13)  |
| 029 | -U7 | -045 | 36.2(10)  | O31 | -U8 | -034  | 73.6(10)  |
| 029 | -U7 | -066 | 86.6(12)  | O31 | -U8 | -050  | 37.7(10)  |
| 029 | -U7 | -087 | 111.0(11) | O31 | -U8 | -093  | 90.4(12)  |
| 029 | -U7 | -096 | 74.1(12)  | O31 | -U8 | -0113 | 141.4(10) |
| 045 | -U7 | -066 | 90.3(12)  | O34 | -U8 | -050  | 111.3(11) |
| 045 | -U7 | -087 | 147.1(11) | O34 | -U8 | -093  | 87.8(13)  |
| 045 | -U7 | -096 | 110.0(11) | O34 | -U8 | -0113 | 145.0(11) |
| 066 | -U7 | -087 | 90.3(12)  | O50 | -U8 | -093  | 90.2(13)  |
| 066 | -U7 | -096 | 91.2(12)  | O50 | -U8 | -0113 | 103.7(11) |
| 087 | -U7 | -096 | 37.1(12)  | O93 | -U8 | -0113 | 91.2(13)  |

Table S5 - Bond Angles (Degrees) (continued)  
For U28a

|     |     |       |           |     |      |      |           |
|-----|-----|-------|-----------|-----|------|------|-----------|
| O4  | -U9 | -O16  | 69.5(9)   | O1  | -U10 | -O37 | 177.5(11) |
| O4  | -U9 | -O20  | 178.8(10) | O1  | -U10 | -O46 | 89.4(12)  |
| O4  | -U9 | -O26  | 87.6(11)  | O1  | -U10 | -O52 | 75.1(10)  |
| O4  | -U9 | -O33  | 89.8(12)  | O1  | -U10 | -O56 | 111.9(11) |
| O4  | -U9 | -O52  | 74.3(9)   | O1  | -U10 | -O59 | 88.2(11)  |
| O4  | -U9 | -O56  | 109.7(11) | O1  | -U10 | -O69 | 141.3(11) |
| O4  | -U9 | -O113 | 144.0(10) | O1  | -U10 | -O73 | 68.7(10)  |
| O16 | -U9 | -O20  | 109.6(10) | O37 | -U10 | -O46 | 91.1(12)  |
| O16 | -U9 | -O26  | 85.1(11)  | O37 | -U10 | -O52 | 107.3(10) |
| O16 | -U9 | -O33  | 91.3(11)  | O37 | -U10 | -O56 | 70.6(11)  |
| O16 | -U9 | -O52  | 143.7(9)  | O37 | -U10 | -O59 | 91.2(12)  |
| O16 | -U9 | -O56  | 177.0(12) | O37 | -U10 | -O69 | 36.2(11)  |
| O16 | -U9 | -O113 | 74.5(10)  | O37 | -U10 | -O73 | 108.9(10) |
| O20 | -U9 | -O26  | 91.6(12)  | O46 | -U10 | -O52 | 91.2(11)  |
| O20 | -U9 | -O33  | 91.0(12)  | O46 | -U10 | -O56 | 92.7(13)  |
| O20 | -U9 | -O52  | 106.6(10) | O46 | -U10 | -O59 | 177.5(14) |
| O20 | -U9 | -O56  | 71.2(11)  | O46 | -U10 | -O69 | 89.5(11)  |
| O20 | -U9 | -O113 | 35.1(11)  | O46 | -U10 | -O73 | 87.5(12)  |
| O26 | -U9 | -O33  | 176.2(12) | O52 | -U10 | -O56 | 36.8(11)  |
| O26 | -U9 | -O52  | 90.6(11)  | O52 | -U10 | -O59 | 89.1(11)  |
| O26 | -U9 | -O56  | 91.9(12)  | O52 | -U10 | -O69 | 143.6(11) |
| O26 | -U9 | -O113 | 88.1(13)  | O52 | -U10 | -O73 | 143.8(10) |
| O33 | -U9 | -O52  | 91.4(11)  | O56 | -U10 | -O59 | 89.0(12)  |
| O33 | -U9 | -O56  | 91.6(12)  | O56 | -U10 | -O69 | 106.8(12) |
| O33 | -U9 | -O113 | 92.4(13)  | O56 | -U10 | -O73 | 179.5(13) |
| O52 | -U9 | -O56  | 35.3(10)  | O59 | -U10 | -O69 | 91.8(11)  |
| O52 | -U9 | -O113 | 141.5(10) | O59 | -U10 | -O73 | 90.9(12)  |
| O56 | -U9 | -O113 | 106.2(11) | O69 | -U10 | -O73 | 72.7(11)  |

Table S5 - Bond Angles (Degrees) (continued)  
For U28a

|     |      |      |           |     |      |      |           |
|-----|------|------|-----------|-----|------|------|-----------|
| O18 | -U11 | -O19 | 68.1(11)  | O6  | -U12 | -O15 | 112.0(10) |
| O18 | -U11 | -O22 | 175.7(11) | O6  | -U12 | -O17 | 89.5(10)  |
| O18 | -U11 | -O24 | 112.5(12) | O6  | -U12 | -O24 | 178.4(11) |
| O18 | -U11 | -O77 | 84.3(14)  | O6  | -U12 | -O40 | 85.2(11)  |
| O18 | -U11 | -O82 | 94.5(13)  | O6  | -U12 | -O42 | 74.4(10)  |
| O18 | -U11 | -O83 | 142.3(11) | O6  | -U12 | -O43 | 69.3(10)  |
| O18 | -U11 | -O98 | 73.7(11)  | O6  | -U12 | -O98 | 142.4(11) |
| O19 | -U11 | -O22 | 111.4(11) | O15 | -U12 | -O17 | 93.3(12)  |
| O19 | -U11 | -O24 | 177.0(11) | O15 | -U12 | -O24 | 68.3(11)  |
| O19 | -U11 | -O77 | 89.0(13)  | O15 | -U12 | -O40 | 92.3(12)  |
| O19 | -U11 | -O82 | 88.5(12)  | O15 | -U12 | -O42 | 37.8(10)  |
| O19 | -U11 | -O83 | 74.9(11)  | O15 | -U12 | -O43 | 178.3(9)  |
| O19 | -U11 | -O98 | 141.5(12) | O15 | -U12 | -O98 | 105.6(10) |
| O22 | -U11 | -O24 | 68.3(12)  | O17 | -U12 | -O24 | 92.1(11)  |
| O22 | -U11 | -O77 | 91.5(14)  | O17 | -U12 | -O40 | 173.4(13) |
| O22 | -U11 | -O82 | 89.7(13)  | O17 | -U12 | -O42 | 89.4(12)  |
| O22 | -U11 | -O83 | 36.6(11)  | O17 | -U12 | -O43 | 85.5(12)  |
| O22 | -U11 | -O98 | 107.1(11) | O17 | -U12 | -O98 | 88.7(11)  |
| O24 | -U11 | -O77 | 94.1(14)  | O24 | -U12 | -O40 | 93.3(12)  |
| O24 | -U11 | -O82 | 88.5(12)  | O24 | -U12 | -O42 | 106.0(11) |
| O24 | -U11 | -O83 | 104.8(12) | O24 | -U12 | -O43 | 110.4(11) |
| O24 | -U11 | -O98 | 38.8(12)  | O24 | -U12 | -O98 | 37.3(12)  |
| O77 | -U11 | -O82 | 177.4(16) | O40 | -U12 | -O42 | 92.9(12)  |
| O77 | -U11 | -O83 | 88.0(14)  | O40 | -U12 | -O43 | 89.0(12)  |
| O77 | -U11 | -O98 | 92.6(13)  | O40 | -U12 | -O98 | 93.2(11)  |
| O82 | -U11 | -O83 | 91.6(13)  | O42 | -U12 | -O43 | 143.4(10) |
| O82 | -U11 | -O98 | 89.3(12)  | O42 | -U12 | -O98 | 143.1(11) |
| O83 | -U11 | -O98 | 143.6(11) | O43 | -U12 | -O98 | 73.1(10)  |

Table S5 - Bond Angles (Degrees) (continued)  
For U28a

|     |      |      |           |     |      |       |           |
|-----|------|------|-----------|-----|------|-------|-----------|
| O4  | -U13 | -O13 | 177.6(11) | O3  | -U14 | -O12  | 67.4(10)  |
| O4  | -U13 | -O15 | 109.6(10) | O3  | -U14 | -O36  | 111.2(11) |
| O4  | -U13 | -O16 | 68.8(9)   | O3  | -U14 | -O49  | 92.9(11)  |
| O4  | -U13 | -O32 | 90.0(11)  | O3  | -U14 | -O55  | 85.9(12)  |
| O4  | -U13 | -O42 | 71.6(10)  | O3  | -U14 | -O84  | 72.2(11)  |
| O4  | -U13 | -O57 | 144.4(11) | O3  | -U14 | -O88  | 137.7(11) |
| O4  | -U13 | -O91 | 90.2(12)  | O3  | -U14 | -O106 | 174.8(13) |
| O13 | -U13 | -O15 | 71.9(10)  | O12 | -U14 | -O36  | 176.1(10) |
| O13 | -U13 | -O16 | 109.8(10) | O12 | -U14 | -O49  | 87.7(12)  |
| O13 | -U13 | -O32 | 91.9(11)  | O12 | -U14 | -O55  | 91.5(12)  |
| O13 | -U13 | -O42 | 109.9(11) | O12 | -U14 | -O84  | 139.6(10) |
| O13 | -U13 | -O57 | 34.2(11)  | O12 | -U14 | -O88  | 70.6(11)  |
| O13 | -U13 | -O91 | 87.8(12)  | O12 | -U14 | -O106 | 107.9(12) |
| O15 | -U13 | -O16 | 178.3(9)  | O36 | -U14 | -O49  | 88.7(12)  |
| O15 | -U13 | -O32 | 91.2(12)  | O36 | -U14 | -O55  | 92.1(13)  |
| O15 | -U13 | -O42 | 38.0(10)  | O36 | -U14 | -O84  | 39.0(11)  |
| O15 | -U13 | -O57 | 106.0(10) | O36 | -U14 | -O88  | 111.0(11) |
| O15 | -U13 | -O91 | 90.1(13)  | O36 | -U14 | -O106 | 73.6(13)  |
| O16 | -U13 | -O32 | 88.3(11)  | O49 | -U14 | -O55  | 178.8(14) |
| O16 | -U13 | -O42 | 140.3(9)  | O49 | -U14 | -O84  | 92.2(12)  |
| O16 | -U13 | -O57 | 75.7(10)  | O49 | -U14 | -O88  | 91.0(12)  |
| O16 | -U13 | -O91 | 90.4(13)  | O49 | -U14 | -O106 | 89.2(13)  |
| O32 | -U13 | -O42 | 89.7(12)  | O55 | -U14 | -O84  | 87.8(13)  |
| O32 | -U13 | -O57 | 88.7(11)  | O55 | -U14 | -O88  | 89.6(13)  |
| O32 | -U13 | -O91 | 178.5(15) | O55 | -U14 | -O106 | 91.9(13)  |
| O42 | -U13 | -O57 | 143.9(11) | O84 | -U14 | -O88  | 149.7(11) |
| O42 | -U13 | -O91 | 91.8(13)  | O84 | -U14 | -O106 | 112.5(13) |
| O57 | -U13 | -O91 | 90.3(13)  | O88 | -U14 | -O106 | 37.5(13)  |

Table S5 - Bond Angles (Degrees) (continued)  
For U28a

|     |      |       |           |     |      |       |           |
|-----|------|-------|-----------|-----|------|-------|-----------|
| O2  | -U15 | -O29  | 110.7(10) | O10 | -U16 | -O14  | 69.1(10)  |
| O2  | -U15 | -O34  | 71.2(10)  | O10 | -U16 | -O44  | 110.6(11) |
| O2  | -U15 | -O45  | 74.1(9)   | O10 | -U16 | -O51  | 73.0(10)  |
| O2  | -U15 | -O72  | 134.9(11) | O10 | -U16 | -O54  | 174.6(13) |
| O2  | -U15 | -O75  | 86.5(13)  | O10 | -U16 | -O68  | 88.7(12)  |
| O2  | -U15 | -O76  | 92.8(12)  | O10 | -U16 | -O78  | 91.9(12)  |
| O2  | -U15 | -O107 | 171.4(12) | O10 | -U16 | -O105 | 137.7(11) |
| O29 | -U15 | -O34  | 176.5(13) | O14 | -U16 | -O44  | 175.2(12) |
| O29 | -U15 | -O45  | 36.7(10)  | O14 | -U16 | -O51  | 141.8(10) |
| O29 | -U15 | -O72  | 114.1(11) | O14 | -U16 | -O54  | 107.1(11) |
| O29 | -U15 | -O75  | 90.7(13)  | O14 | -U16 | -O68  | 92.1(12)  |
| O29 | -U15 | -O76  | 87.6(13)  | O14 | -U16 | -O78  | 87.2(12)  |
| O29 | -U15 | -O107 | 74.8(11)  | O14 | -U16 | -O105 | 68.8(11)  |
| O34 | -U15 | -O45  | 145.2(10) | O44 | -U16 | -O51  | 37.6(11)  |
| O34 | -U15 | -O72  | 64.3(12)  | O44 | -U16 | -O54  | 73.5(12)  |
| O34 | -U15 | -O75  | 92.4(13)  | O44 | -U16 | -O68  | 92.7(13)  |
| O34 | -U15 | -O76  | 89.4(13)  | O44 | -U16 | -O78  | 88.1(13)  |
| O34 | -U15 | -O107 | 103.7(11) | O44 | -U16 | -O105 | 111.7(12) |
| O45 | -U15 | -O72  | 150.2(11) | O51 | -U16 | -O54  | 111.0(12) |
| O45 | -U15 | -O75  | 87.1(13)  | O51 | -U16 | -O68  | 90.8(12)  |
| O45 | -U15 | -O76  | 90.6(12)  | O51 | -U16 | -O78  | 90.4(13)  |
| O45 | -U15 | -O107 | 111.0(10) | O51 | -U16 | -O105 | 149.3(12) |
| O72 | -U15 | -O75  | 88.2(14)  | O54 | -U16 | -O68  | 87.6(14)  |
| O72 | -U15 | -O76  | 93.9(14)  | O54 | -U16 | -O78  | 91.6(14)  |
| O72 | -U15 | -O107 | 39.4(12)  | O54 | -U16 | -O105 | 38.3(12)  |
| O75 | -U15 | -O76  | 177.7(12) | O68 | -U16 | -O78  | 178.8(15) |
| O75 | -U15 | -O107 | 86.9(14)  | O68 | -U16 | -O105 | 89.0(13)  |
| O76 | -U15 | -O107 | 94.1(13)  | O78 | -U16 | -O105 | 89.9(13)  |

Table S5 - Bond Angles (Degrees) (continued)  
For U28a

|      |      |       |           |     |      |       |           |
|------|------|-------|-----------|-----|------|-------|-----------|
| O18  | -U17 | -O19  | 66.3(11)  | O8  | -U18 | -O36  | 109.3(11) |
| O18  | -U17 | -O44  | 109.0(11) | O8  | -U18 | -O41  | 171.3(12) |
| O18  | -U17 | -O51  | 74.1(11)  | O8  | -U18 | -O48  | 68.8(11)  |
| O18  | -U17 | -O53  | 92.4(12)  | O8  | -U18 | -O84  | 71.2(11)  |
| O18  | -U17 | -O63  | 89.6(12)  | O8  | -U18 | -O85  | 84.9(13)  |
| O18  | -U17 | -O122 | 135.2(12) | O8  | -U18 | -O95  | 94.1(12)  |
| O18  | -U17 | -O131 | 176.0(11) | O8  | -U18 | -O111 | 136.8(13) |
| O19  | -U17 | -O44  | 172.7(10) | O36 | -U18 | -O41  | 75.8(12)  |
| O19  | -U17 | -O51  | 140.2(11) | O36 | -U18 | -O48  | 176.2(10) |
| O19  | -U17 | -O53  | 89.3(12)  | O36 | -U18 | -O84  | 38.0(11)  |
| O19  | -U17 | -O63  | 93.1(12)  | O36 | -U18 | -O85  | 91.1(15)  |
| O19  | -U17 | -O122 | 69.0(12)  | O36 | -U18 | -O95  | 88.6(13)  |
| O19  | -U17 | -O131 | 111.3(12) | O36 | -U18 | -O111 | 114.0(12) |
| O44  | -U17 | -O51  | 35.0(11)  | O41 | -U18 | -O48  | 106.6(12) |
| O44  | -U17 | -O53  | 85.3(12)  | O41 | -U18 | -O84  | 113.4(12) |
| O44  | -U17 | -O63  | 92.5(12)  | O41 | -U18 | -O85  | 87.9(14)  |
| O44  | -U17 | -O122 | 115.8(12) | O41 | -U18 | -O95  | 93.1(12)  |
| O44  | -U17 | -O131 | 73.6(12)  | O41 | -U18 | -O111 | 38.7(13)  |
| O51  | -U17 | -O53  | 88.8(12)  | O48 | -U18 | -O84  | 139.9(11) |
| O51  | -U17 | -O63  | 90.2(12)  | O48 | -U18 | -O85  | 91.9(15)  |
| O51  | -U17 | -O122 | 150.7(12) | O48 | -U18 | -O95  | 88.3(13)  |
| O51  | -U17 | -O131 | 108.4(12) | O48 | -U18 | -O111 | 68.1(12)  |
| O53  | -U17 | -O63  | 177.4(14) | O84 | -U18 | -O85  | 86.7(15)  |
| O53  | -U17 | -O122 | 91.0(13)  | O84 | -U18 | -O95  | 92.4(13)  |
| O53  | -U17 | -O131 | 90.7(13)  | O84 | -U18 | -O111 | 151.9(12) |
| O63  | -U17 | -O122 | 88.8(13)  | O85 | -U18 | -O95  | 178.8(15) |
| O63  | -U17 | -O131 | 87.3(13)  | O85 | -U18 | -O111 | 93.3(15)  |
| O122 | -U17 | -O131 | 42.3(14)  | O95 | -U18 | -O111 | 87.9(13)  |

Table S5 - Bond Angles (Degrees) (continued)  
For U28a

|      |      |       |           |      |      |       |           |
|------|------|-------|-----------|------|------|-------|-----------|
| O65  | -U19 | -O72  | 89.9(13)  | O61  | -U20 | -O86  | 90.0(13)  |
| O65  | -U19 | -O107 | 86.3(14)  | O61  | -U20 | -O88  | 109.5(12) |
| O65  | -U19 | -O118 | 177.0(17) | O61  | -U20 | -O106 | 73.4(13)  |
| O65  | -U19 | -O126 | 85.6(14)  | O61  | -U20 | -O109 | 85.8(16)  |
| O65  | -U19 | -O127 | 88.5(13)  | O61  | -U20 | -O112 | 170.3(12) |
| O65  | -U19 | -O128 | 85.4(13)  | O61  | -U20 | -O123 | 103.9(13) |
| O65  | -U19 | -O134 | 100.2(16) | O61  | -U20 | -O138 | 38.8(16)  |
| O72  | -U19 | -O107 | 37.6(11)  | O86  | -U20 | -O88  | 93.5(13)  |
| O72  | -U19 | -O118 | 92.9(15)  | O86  | -U20 | -O106 | 83.7(13)  |
| O72  | -U19 | -O126 | 144.1(12) | O86  | -U20 | -O109 | 175.6(18) |
| O72  | -U19 | -O127 | 109.0(12) | O86  | -U20 | -O112 | 89.7(13)  |
| O72  | -U19 | -O128 | 79.7(12)  | O86  | -U20 | -O123 | 83.8(13)  |
| O72  | -U19 | -O134 | 147.3(15) | O86  | -U20 | -O138 | 93.4(17)  |
| O107 | -U19 | -O118 | 96.5(15)  | O88  | -U20 | -O106 | 37.4(13)  |
| O107 | -U19 | -O126 | 171.8(13) | O88  | -U20 | -O109 | 86.7(16)  |
| O107 | -U19 | -O127 | 71.5(12)  | O88  | -U20 | -O112 | 80.2(12)  |
| O107 | -U19 | -O128 | 116.7(13) | O88  | -U20 | -O123 | 146.5(13) |
| O107 | -U19 | -O134 | 111.5(15) | O88  | -U20 | -O138 | 147.5(15) |
| O118 | -U19 | -O126 | 91.5(15)  | O106 | -U20 | -O109 | 93.8(18)  |
| O118 | -U19 | -O127 | 91.5(14)  | O106 | -U20 | -O112 | 116.2(13) |
| O118 | -U19 | -O128 | 94.2(14)  | O106 | -U20 | -O123 | 167.3(13) |
| O118 | -U19 | -O134 | 77.9(18)  | O106 | -U20 | -O138 | 112.2(17) |
| O126 | -U19 | -O127 | 106.5(13) | O109 | -U20 | -O112 | 94.8(17)  |
| O126 | -U19 | -O128 | 64.4(13)  | O109 | -U20 | -O123 | 98.4(17)  |
| O126 | -U19 | -O134 | 68.3(16)  | O109 | -U20 | -O138 | 84.0(19)  |
| O127 | -U19 | -O128 | 169.4(14) | O112 | -U20 | -O123 | 66.4(13)  |
| O127 | -U19 | -O134 | 41.2(15)  | O112 | -U20 | -O138 | 131.5(16) |
| O128 | -U19 | -O134 | 131.7(16) | O123 | -U20 | -O138 | 65.9(16)  |



Table S5 - Bond Angles (Degrees) (continued)  
For U28a

|      |      |       |           |      |      |       |           |
|------|------|-------|-----------|------|------|-------|-----------|
| 074  | -U21 | -087  | 91.2(12)  | 041  | -U22 | -067  | 87.1(12)  |
| 074  | -U21 | -096  | 87.5(13)  | 041  | -U22 | -097  | 75.0(12)  |
| 074  | -U21 | -0102 | 90.9(13)  | 041  | -U22 | -0111 | 39.0(13)  |
| 074  | -U21 | -0110 | 179.0(18) | 041  | -U22 | -0115 | 97.0(14)  |
| 074  | -U21 | -0120 | 90.2(13)  | 041  | -U22 | -0124 | 114.0(13) |
| 074  | -U21 | -0139 | 86.2(16)  | 041  | -U22 | -0126 | 171.5(13) |
| 074  | -U21 | -0144 | 94.9(16)  | 041  | -U22 | -0128 | 116.4(13) |
| 087  | -U21 | -096  | 37.3(13)  | 067  | -U22 | -097  | 91.0(13)  |
| 087  | -U21 | -0102 | 107.1(13) | 067  | -U22 | -0111 | 88.7(12)  |
| 087  | -U21 | -0110 | 88.3(15)  | 067  | -U22 | -0115 | 175.5(14) |
| 087  | -U21 | -0120 | 79.8(13)  | 067  | -U22 | -0124 | 97.6(13)  |
| 087  | -U21 | -0139 | 145.2(16) | 067  | -U22 | -0126 | 84.7(13)  |
| 087  | -U21 | -0144 | 149.1(18) | 067  | -U22 | -0128 | 84.7(13)  |
| 096  | -U21 | -0102 | 70.0(13)  | 097  | -U22 | -0111 | 113.9(13) |
| 096  | -U21 | -0110 | 91.5(16)  | 097  | -U22 | -0115 | 88.1(16)  |
| 096  | -U21 | -0120 | 116.9(14) | 097  | -U22 | -0124 | 39.3(12)  |
| 096  | -U21 | -0139 | 173.2(15) | 097  | -U22 | -0126 | 102.8(13) |
| 096  | -U21 | -0144 | 112.6(18) | 097  | -U22 | -0128 | 167.6(12) |
| 0102 | -U21 | -0110 | 88.5(15)  | 0111 | -U22 | -0115 | 95.7(15)  |
| 0102 | -U21 | -0120 | 173.0(14) | 0111 | -U22 | -0124 | 152.1(13) |
| 0102 | -U21 | -0139 | 107.6(16) | 0111 | -U22 | -0126 | 142.8(13) |
| 0102 | -U21 | -0144 | 42.7(18)  | 0111 | -U22 | -0128 | 77.8(13)  |
| 0110 | -U21 | -0120 | 90.5(15)  | 0115 | -U22 | -0124 | 79.0(16)  |
| 0110 | -U21 | -0139 | 94.8(18)  | 0115 | -U22 | -0126 | 91.2(15)  |
| 0110 | -U21 | -0144 | 85.2(18)  | 0115 | -U22 | -0128 | 95.3(16)  |
| 0120 | -U21 | -0139 | 65.6(16)  | 0124 | -U22 | -0126 | 65.0(13)  |
| 0120 | -U21 | -0144 | 130.4(18) | 0124 | -U22 | -0128 | 129.7(13) |
| 0139 | -U21 | -0144 | 66(2)     | 0126 | -U22 | -0128 | 65.2(13)  |

Table S5 - Bond Angles (Degrees) (continued)  
For U28a

|      |      |       |           |      |      |       |           |
|------|------|-------|-----------|------|------|-------|-----------|
| O70  | -U23 | -O120 | 91.7(14)  | O54  | -U24 | -O90  | 87.7(14)  |
| O70  | -U23 | -O121 | 175.0(17) | O54  | -U24 | -O105 | 36.7(12)  |
| O70  | -U23 | -O122 | 94.7(13)  | O54  | -U24 | -O108 | 72.8(13)  |
| O70  | -U23 | -O125 | 93.1(13)  | O54  | -U24 | -O112 | 113.6(13) |
| O70  | -U23 | -O131 | 86.5(14)  | O54  | -U24 | -O123 | 168.4(13) |
| O70  | -U23 | -O139 | 84.2(16)  | O54  | -U24 | -O130 | 113.6(12) |
| O70  | -U23 | -O142 | 88.4(14)  | O54  | -U24 | -O132 | 95.5(15)  |
| O120 | -U23 | -O121 | 91.8(16)  | O90  | -U24 | -O105 | 91.9(14)  |
| O120 | -U23 | -O122 | 78.6(14)  | O90  | -U24 | -O108 | 90.8(14)  |
| O120 | -U23 | -O125 | 125.7(14) | O90  | -U24 | -O112 | 87.2(14)  |
| O120 | -U23 | -O131 | 119.8(14) | O90  | -U24 | -O123 | 81.6(14)  |
| O120 | -U23 | -O139 | 64.5(16)  | O90  | -U24 | -O130 | 95.8(14)  |
| O120 | -U23 | -O142 | 166.0(14) | O90  | -U24 | -O132 | 176.2(15) |
| O121 | -U23 | -O122 | 89.6(15)  | O105 | -U24 | -O108 | 109.2(13) |
| O121 | -U23 | -O125 | 81.9(15)  | O105 | -U24 | -O112 | 77.4(13)  |
| O121 | -U23 | -O131 | 94.9(16)  | O105 | -U24 | -O123 | 147.6(12) |
| O121 | -U23 | -O139 | 94.1(18)  | O105 | -U24 | -O130 | 149.0(12) |
| O121 | -U23 | -O142 | 87.4(16)  | O105 | -U24 | -O132 | 89.4(16)  |
| O122 | -U23 | -O125 | 154.3(14) | O108 | -U24 | -O112 | 173.2(14) |
| O122 | -U23 | -O131 | 41.8(14)  | O108 | -U24 | -O123 | 102.6(13) |
| O122 | -U23 | -O139 | 143.0(16) | O108 | -U24 | -O130 | 40.9(13)  |
| O122 | -U23 | -O142 | 115.3(14) | O108 | -U24 | -O132 | 92.2(15)  |
| O125 | -U23 | -O131 | 114.5(14) | O112 | -U24 | -O123 | 70.7(13)  |
| O125 | -U23 | -O139 | 62.3(16)  | O112 | -U24 | -O130 | 132.9(13) |
| O125 | -U23 | -O142 | 40.4(14)  | O112 | -U24 | -O132 | 89.6(15)  |
| O131 | -U23 | -O139 | 169.9(15) | O123 | -U24 | -O130 | 63.4(13)  |
| O131 | -U23 | -O142 | 74.2(14)  | O123 | -U24 | -O132 | 95.4(16)  |
| O139 | -U23 | -O142 | 101.7(16) | O130 | -U24 | -O132 | 84.9(16)  |

Table S5 - Bond Angles (Degrees) (continued)  
For U28a

|      |      |       |           |      |      |       |           |
|------|------|-------|-----------|------|------|-------|-----------|
| O61  | -U25 | -O81  | 88.2(14)  | O100 | -U26 | -O108 | 87.2(15)  |
| O61  | -U25 | -O97  | 79.8(13)  | O100 | -U26 | -O125 | 90.9(14)  |
| O61  | -U25 | -O124 | 121.8(13) | O100 | -U26 | -O130 | 87.3(14)  |
| O61  | -U25 | -O129 | 112.6(13) | O100 | -U26 | -O133 | 178.1(16) |
| O61  | -U25 | -O135 | 86.0(14)  | O100 | -U26 | -O137 | 90.3(15)  |
| O61  | -U25 | -O136 | 161.9(13) | O100 | -U26 | -O142 | 91.0(14)  |
| O61  | -U25 | -O138 | 39.2(15)  | O100 | -U26 | -O143 | 86.7(14)  |
| O81  | -U25 | -O97  | 90.0(15)  | O108 | -U26 | -O125 | 121.4(14) |
| O81  | -U25 | -O124 | 91.3(16)  | O108 | -U26 | -O130 | 42.3(13)  |
| O81  | -U25 | -O129 | 94.6(14)  | O108 | -U26 | -O133 | 94.6(15)  |
| O81  | -U25 | -O135 | 174.1(17) | O108 | -U26 | -O137 | 162.6(13) |
| O81  | -U25 | -O136 | 92.4(15)  | O108 | -U26 | -O142 | 79.5(14)  |
| O81  | -U25 | -O138 | 87.2(17)  | O108 | -U26 | -O143 | 111.0(13) |
| O97  | -U25 | -O124 | 42.0(14)  | O125 | -U26 | -O130 | 163.7(14) |
| O97  | -U25 | -O129 | 166.8(13) | O125 | -U26 | -O133 | 88.5(15)  |
| O97  | -U25 | -O135 | 87.8(15)  | O125 | -U26 | -O137 | 75.8(13)  |
| O97  | -U25 | -O136 | 118.2(14) | O125 | -U26 | -O142 | 42.0(14)  |
| O97  | -U25 | -O138 | 119.0(16) | O125 | -U26 | -O143 | 127.4(14) |
| O124 | -U25 | -O129 | 125.4(14) | O130 | -U26 | -O133 | 93.7(15)  |
| O124 | -U25 | -O135 | 90.8(16)  | O130 | -U26 | -O137 | 120.4(13) |
| O124 | -U25 | -O136 | 76.2(14)  | O130 | -U26 | -O142 | 121.8(14) |
| O124 | -U25 | -O138 | 161.0(16) | O130 | -U26 | -O143 | 68.7(14)  |
| O129 | -U25 | -O135 | 88.7(14)  | O133 | -U26 | -O137 | 87.8(15)  |
| O129 | -U25 | -O136 | 49.3(14)  | O133 | -U26 | -O142 | 89.8(15)  |
| O129 | -U25 | -O138 | 73.7(16)  | O133 | -U26 | -O143 | 92.3(14)  |
| O135 | -U25 | -O136 | 93.5(15)  | O137 | -U26 | -O142 | 117.8(14) |
| O135 | -U25 | -O138 | 89.1(17)  | O137 | -U26 | -O143 | 51.7(13)  |
| O136 | -U25 | -O138 | 122.8(16) | O142 | -U26 | -O143 | 169.2(14) |

Table S5 - Bond Angles (Degrees) (continued)  
For U28a

|      |      |       |           |      |      |       |           |
|------|------|-------|-----------|------|------|-------|-----------|
| O92  | -U27 | -O99  | 89.0(13)  | O35  | -U28 | -O92  | 88.5(14)  |
| O92  | -U27 | -O102 | 162.9(13) | O35  | -U28 | -O119 | 178.9(18) |
| O92  | -U27 | -O127 | 122.6(12) | O35  | -U28 | -O129 | 89.6(13)  |
| O92  | -U27 | -O134 | 79.1(17)  | O35  | -U28 | -O136 | 87.1(14)  |
| O92  | -U27 | -O140 | 39.4(12)  | O35  | -U28 | -O137 | 90.3(14)  |
| O92  | -U27 | -O141 | 91.6(15)  | O35  | -U28 | -O140 | 92.4(13)  |
| O92  | -U27 | -O144 | 120.1(17) | O35  | -U28 | -O143 | 86.3(14)  |
| O99  | -U27 | -O102 | 90.6(13)  | O92  | -U28 | -O119 | 92.0(16)  |
| O99  | -U27 | -O127 | 87.7(14)  | O92  | -U28 | -O129 | 123.2(13) |
| O99  | -U27 | -O134 | 93.9(17)  | O92  | -U28 | -O136 | 73.4(13)  |
| O99  | -U27 | -O140 | 94.8(14)  | O92  | -U28 | -O137 | 118.9(13) |
| O99  | -U27 | -O141 | 178.3(16) | O92  | -U28 | -O140 | 40.2(13)  |
| O99  | -U27 | -O144 | 89.5(16)  | O92  | -U28 | -O143 | 166.6(12) |
| O102 | -U27 | -O127 | 74.4(13)  | O119 | -U28 | -O129 | 89.3(14)  |
| O102 | -U27 | -O134 | 117.9(17) | O119 | -U28 | -O136 | 92.1(16)  |
| O102 | -U27 | -O140 | 123.7(13) | O119 | -U28 | -O137 | 90.3(16)  |
| O102 | -U27 | -O141 | 88.3(14)  | O119 | -U28 | -O140 | 88.6(15)  |
| O102 | -U27 | -O144 | 42.9(17)  | O119 | -U28 | -O143 | 93.4(16)  |
| O127 | -U27 | -O134 | 44.0(16)  | O129 | -U28 | -O136 | 49.8(14)  |
| O127 | -U27 | -O140 | 161.6(12) | O129 | -U28 | -O137 | 117.8(13) |
| O127 | -U27 | -O141 | 93.3(16)  | O129 | -U28 | -O140 | 163.1(13) |
| O127 | -U27 | -O144 | 117.2(17) | O129 | -U28 | -O143 | 69.1(12)  |
| O134 | -U27 | -O140 | 117.5(17) | O136 | -U28 | -O137 | 167.4(14) |
| O134 | -U27 | -O141 | 87.8(18)  | O136 | -U28 | -O140 | 113.5(14) |
| O134 | -U27 | -O144 | 161(2)    | O136 | -U28 | -O143 | 118.6(13) |
| O140 | -U27 | -O141 | 84.6(16)  | O137 | -U28 | -O140 | 78.9(13)  |
| O140 | -U27 | -O144 | 81.1(17)  | O137 | -U28 | -O143 | 48.8(13)  |
| O141 | -U27 | -O144 | 88.7(17)  | O140 | -U28 | -O143 | 127.7(12) |

Table S5 - Bond Angles (Degrees) (continued)  
For U28a

|      |      |       |           |     |      |       |           |
|------|------|-------|-----------|-----|------|-------|-----------|
| O104 | -S1  | -O116 | 105(2)    | U12 | -O15 | -O42  | 75.5(17)  |
| O104 | -S1  | -O117 | 107(2)    | U9  | -O16 | -U13  | 109.2(11) |
| O114 | -S1  | -O116 | 114(2)    | U11 | -O18 | -U17  | 110.9(13) |
| O114 | -S1  | -O117 | 114(2)    | U11 | -O19 | -U17  | 111.1(13) |
| O116 | -S1  | -O117 | 106(2)    | U9  | -O20 | -O113 | 75.0(19)  |
| O104 | -S1  | -O114 | 110(2)    | U8  | -O20 | -U9   | 125.2(13) |
| U4   | -O1  | -U10  | 109.0(11) | U8  | -O20 | -O113 | 72.3(17)  |
| U8   | -O2  | -U15  | 109.8(11) | U5  | -O22 | -O83  | 71.8(18)  |
| U3   | -O3  | -U14  | 109.0(12) | U5  | -O22 | -U11  | 120.8(13) |
| U9   | -O4  | -U13  | 107.9(11) | U11 | -O22 | -O83  | 72.8(19)  |
| U5   | -O5  | -U7   | 109.5(14) | U3  | -O23 | -O79  | 72.5(17)  |
| U6   | -O6  | -U12  | 108.0(10) | U3  | -O23 | -U4   | 126.7(15) |
| U6   | -O7  | -O47  | 73.2(18)  | U4  | -O23 | -O79  | 78.3(19)  |
| U1   | -O7  | -U6   | 125.7(14) | U12 | -O24 | -O98  | 74.8(16)  |
| U1   | -O7  | -O47  | 77.2(16)  | U11 | -O24 | -U12  | 122.9(14) |
| U2   | -O8  | -U18  | 109.3(13) | U11 | -O24 | -O98  | 69.9(16)  |
| U1   | -O9  | -O103 | 76.0(16)  | U4  | -O28 | -U6   | 120.5(14) |
| U1   | -O9  | -U3   | 124.2(13) | U4  | -O28 | -O71  | 71.8(18)  |
| U3   | -O9  | -O103 | 74.0(17)  | U6  | -O28 | -O71  | 73.4(17)  |
| U1   | -O10 | -U16  | 110.3(11) | U15 | -O29 | -O45  | 70.6(16)  |
| U5   | -O11 | -U7   | 109.8(12) | U7  | -O29 | -O45  | 71.1(17)  |
| U3   | -O12 | -U14  | 112.3(13) | U7  | -O29 | -U15  | 126.5(14) |
| U13  | -O13 | -O57  | 76.2(17)  | U8  | -O31 | -O50  | 71.1(15)  |
| U5   | -O13 | -U13  | 123.9(12) | U2  | -O31 | -O50  | 68.1(17)  |
| U5   | -O13 | -O57  | 72.3(17)  | U2  | -O31 | -U8   | 118.2(12) |
| U1   | -O14 | -U16  | 108.8(12) | U8  | -O34 | -U15  | 106.6(12) |
| U13  | -O15 | -O42  | 70.8(16)  | U14 | -O36 | -O84  | 70.9(17)  |
| U12  | -O15 | -U13  | 121.8(12) | U14 | -O36 | -U18  | 126.1(13) |

Table S5 - Bond Angles (Degrees) (continued)  
For U28a

|     |      |       |           |     |      |       |           |
|-----|------|-------|-----------|-----|------|-------|-----------|
| U18 | -036 | -084  | 70.4(18)  | U9  | -052 | -056  | 70.3(16)  |
| U10 | -037 | -069  | 73.4(18)  | U9  | -052 | -U10  | 118.5(10) |
| U2  | -037 | -U10  | 126.9(14) | U24 | -054 | -0105 | 70.1(19)  |
| U2  | -037 | -069  | 76.9(16)  | U16 | -054 | -U24  | 128.4(16) |
| U18 | -041 | -0111 | 71.2(18)  | U16 | -054 | -0105 | 70.3(19)  |
| U22 | -041 | -0111 | 69.8(18)  | U10 | -056 | -052  | 75.2(19)  |
| U18 | -041 | -U22  | 127.1(15) | U9  | -056 | -U10  | 125.1(15) |
| U13 | -042 | -015  | 71.2(16)  | U9  | -056 | -052  | 74.3(16)  |
| U12 | -042 | -U13  | 116.8(13) | U5  | -057 | -U13  | 120.5(15) |
| U12 | -042 | -015  | 66.7(16)  | U13 | -057 | -013  | 69.6(17)  |
| U6  | -043 | -U12  | 109.2(12) | U5  | -057 | -013  | 72.9(18)  |
| U16 | -044 | -U17  | 130.4(15) | U20 | -061 | -U25  | 118.8(14) |
| U16 | -044 | -051  | 72.8(17)  | U25 | -061 | -0138 | 66(2)     |
| U17 | -044 | -051  | 71.0(18)  | U20 | -061 | -0138 | 70(2)     |
| U7  | -045 | -U15  | 129.1(13) | U10 | -069 | -037  | 70.4(16)  |
| U7  | -045 | -029  | 72.8(17)  | U2  | -069 | -037  | 68.7(16)  |
| U15 | -045 | -029  | 72.8(16)  | U2  | -069 | -U10  | 120.3(12) |
| U1  | -047 | -07   | 67.0(15)  | U6  | -071 | -028  | 69.5(17)  |
| U1  | -047 | -U6   | 118.4(12) | U4  | -071 | -U6   | 117.6(13) |
| U6  | -047 | -07   | 71.0(18)  | U4  | -071 | -028  | 70.6(17)  |
| U2  | -048 | -U18  | 108.5(14) | U19 | -072 | -0107 | 66.5(18)  |
| U2  | -050 | -031  | 73.7(17)  | U15 | -072 | -U19  | 124.1(16) |
| U8  | -050 | -031  | 71.2(15)  | U15 | -072 | -0107 | 73.3(18)  |
| U2  | -050 | -U8   | 121.6(14) | U4  | -073 | -U10  | 107.6(11) |
| U16 | -051 | -U17  | 130.2(14) | U3  | -079 | -U4   | 118.9(11) |
| U16 | -051 | -044  | 69.6(17)  | U3  | -079 | -023  | 71.3(17)  |
| U17 | -051 | -044  | 74.0(19)  | U4  | -079 | -023  | 66.4(17)  |
| U10 | -052 | -056  | 68.0(16)  | U11 | -083 | -022  | 70.6(18)  |

Table S5 - Bond Angles (Degrees) (continued)  
For U28a

|     |       |       |           |     |       |       |           |
|-----|-------|-------|-----------|-----|-------|-------|-----------|
| U5  | -083  | -022  | 69.8(18)  | U3  | -0103 | -09   | 68.5(17)  |
| U5  | -083  | -U11  | 118.3(13) | U24 | -0105 | -054  | 73(2)     |
| U18 | -084  | -036  | 71.5(18)  | U16 | -0105 | -U24  | 131.4(17) |
| U14 | -084  | -036  | 70.1(18)  | U16 | -0105 | -054  | 71.3(19)  |
| U14 | -084  | -U18  | 126.3(13) | U14 | -0106 | -U20  | 131.5(17) |
| U21 | -087  | -096  | 71(2)     | U20 | -0106 | -088  | 71.8(19)  |
| U7  | -087  | -U21  | 130.7(15) | U14 | -0106 | -088  | 73(2)     |
| U7  | -087  | -096  | 74(2)     | U15 | -0107 | -072  | 67.3(18)  |
| U20 | -088  | -0106 | 70.8(19)  | U15 | -0107 | -U19  | 126.4(15) |
| U14 | -088  | -U20  | 127.8(17) | U19 | -0107 | -072  | 75.9(19)  |
| U14 | -088  | -0106 | 69(2)     | U24 | -0108 | -0130 | 70.5(18)  |
| U27 | -092  | -U28  | 123.1(16) | U24 | -0108 | -U26  | 122.2(17) |
| U28 | -092  | -0140 | 75(2)     | U26 | -0108 | -0130 | 68(2)     |
| U27 | -092  | -0140 | 67.6(19)  | U22 | -0111 | -041  | 71.3(18)  |
| U7  | -096  | -U21  | 127.3(18) | U18 | -0111 | -U22  | 127.5(18) |
| U21 | -096  | -087  | 72(2)     | U18 | -0111 | -041  | 70.1(19)  |
| U7  | -096  | -087  | 68.9(19)  | U20 | -0112 | -U24  | 110.9(16) |
| U25 | -097  | -0124 | 69.1(19)  | U8  | -0113 | -U9   | 122.3(15) |
| U22 | -097  | -0124 | 69(2)     | U8  | -0113 | -020  | 72.6(17)  |
| U22 | -097  | -U25  | 120.4(15) | U9  | -0113 | -020  | 69.9(18)  |
| U12 | -098  | -024  | 67.9(16)  | U21 | -0120 | -U23  | 112.5(15) |
| U11 | -098  | -U12  | 119.5(14) | U23 | -0122 | -0131 | 68.9(19)  |
| U11 | -098  | -024  | 71.3(17)  | U17 | -0122 | -0131 | 68.8(19)  |
| U27 | -0102 | -0144 | 65(2)     | U17 | -0122 | -U23  | 125.9(15) |
| U21 | -0102 | -U27  | 116.5(17) | U20 | -0123 | -U24  | 108.7(16) |
| U21 | -0102 | -0144 | 66(2)     | U22 | -0124 | -097  | 71(2)     |
| U1  | -0103 | -U3   | 116.1(13) | U22 | -0124 | -U25  | 121.5(18) |
| U1  | -0103 | -09   | 67.5(15)  | U25 | -0124 | -097  | 69(2)     |

Table S5 - Bond Angles (Degrees) (continued)  
For U28a

|     |       |       |           |     |       |       |           |
|-----|-------|-------|-----------|-----|-------|-------|-----------|
| U26 | -O125 | -O142 | 68.2(18)  | U19 | -O134 | -O127 | 66(2)     |
| U23 | -O125 | -U26  | 119.4(16) | U25 | -O136 | -U28  | 119.4(18) |
| U23 | -O125 | -O142 | 67.6(19)  | U26 | -O137 | -U28  | 120.9(16) |
| U19 | -O126 | -U22  | 111.0(16) | U20 | -O138 | -U25  | 125(2)    |
| U19 | -O127 | -U27  | 119.0(16) | U20 | -O138 | -O61  | 72(2)     |
| U19 | -O127 | -O134 | 73(2)     | U25 | -O138 | -O61  | 75(3)     |
| U27 | -O127 | -O134 | 66(2)     | U21 | -O139 | -U23  | 110(2)    |
| U19 | -O128 | -U22  | 116.8(16) | U28 | -O140 | -O92  | 65.0(19)  |
| U25 | -O129 | -U28  | 113.1(16) | U27 | -O140 | -O92  | 73(2)     |
| U26 | -O130 | -O108 | 70.0(19)  | U27 | -O140 | -U28  | 120.2(15) |
| U24 | -O130 | -O108 | 68.6(19)  | U26 | -O142 | -O125 | 69.8(19)  |
| U24 | -O130 | -U26  | 122.5(17) | U23 | -O142 | -U26  | 123.4(17) |
| U23 | -O131 | -O122 | 69.3(19)  | U23 | -O142 | -O125 | 72(2)     |
| U17 | -O131 | -U23  | 126.3(18) | U26 | -O143 | -U28  | 115.9(16) |
| U17 | -O131 | -O122 | 68.9(19)  | U27 | -O144 | -O102 | 72(2)     |
| U27 | -O134 | -O127 | 70(2)     | U21 | -O144 | -U27  | 125(2)    |
| U19 | -O134 | -U27  | 118(2)    | U21 | -O144 | -O102 | 71(2)     |



Table S6 - Crystal Data and Details of the Structure Determination  
For U30

| Crystal Data                        |                               |           |           |
|-------------------------------------|-------------------------------|-----------|-----------|
| Formula                             | O150 U30, 4(Mg O6), 65(O), Li |           |           |
| Formula Weight                      | 11069.08                      |           |           |
| Crystal System                      | Tetragonal                    |           |           |
| Space group                         | P-4m2                         | (No.115)  |           |
| a, b, c [Angstrom]                  | 22.308(2)                     | 22.308(2) | 28.918(4) |
| V [Ang**3]                          | 14391(3)                      |           |           |
| Z                                   | 2                             |           |           |
| D(calc) [g/cm**3]                   | 2.555                         |           |           |
| Mu(MoKa) [ /mm ]                    | 16.919                        |           |           |
| F(000)                              | 9446                          |           |           |
| Crystal Size [mm]                   | 0.05 x 0.12 x 0.13            |           |           |
| Data Collection                     |                               |           |           |
| Temperature (K)                     | 120                           |           |           |
| Radiation [Angstrom]                | MoKa                          | 0.71073   |           |
| Theta Min-Max [Deg]                 | 1.5, 23.3                     |           |           |
| Dataset                             | -24: 24 ; -24: 24 ; -32: 32   |           |           |
| Tot., Uniq. Data, R(int)            | 134538,                       | 10992,    | 0.155     |
| Observed data [I > 2.0 sigma(I)]    | 8853                          |           |           |
| Refinement                          |                               |           |           |
| Nref, Npar                          | 10992, 354                    |           |           |
| R, wR2, S                           | 0.0511, 0.1438, 1.18          |           |           |
| w = 1/[\s^2^(Fo^2^)+(0.0754P)^2^]   | where P=(Fo^2^+2Fc^2^)/3      |           |           |
| Max. and Av. Shift/Error            | 0.01, 0.00                    |           |           |
| Flack x                             | -0.005(16)                    |           |           |
| Min. and Max. Resd. Dens. [e/Ang^3] | -1.22, 3.25                   |           |           |

Table S7 - Final Coordinates and Equivalent Isotropic Displacement Parameters of the non-Hydrogen atoms For U30

| Atom<br>---- | x<br>---   | y<br>---   | z<br>---   | U(eq) [Ang <sup>2</sup> ]<br>----- |
|--------------|------------|------------|------------|------------------------------------|
| U1           | 0.86857(4) | 0.68236(4) | 0.55050(3) | 0.0269(3)                          |
| U2           | 1          | 0.58563(5) | 0.48110(4) | 0.0252(4)                          |
| U3           | 1          | 0.78386(5) | 0.61635(5) | 0.0309(4)                          |
| U4           | 0.74738(4) | 0.59719(4) | 0.62228(3) | 0.0285(3)                          |
| U5           | 0.72092(4) | 0.65268(4) | 0.76240(4) | 0.0377(3)                          |
| U6           | 0.69923(6) | 1/2        | 0.84350(5) | 0.0402(5)                          |
| U7           | 1          | 0.81326(6) | 0.74834(5) | 0.0394(5)                          |
| U8           | 0.90758(5) | 0.66115(5) | 0.94683(4) | 0.0494(4)                          |
| U9           | 0.81989(7) | 1/2        | 0.95339(6) | 0.0547(6)                          |
| U10          | 0.85218(5) | 0.75986(5) | 0.83030(4) | 0.0457(4)                          |
| O1           | 0.8217(6)  | 0.7240(6)  | 0.5124(5)  | 0.022(3)                           |
| O2           | 1          | 0.5971(9)  | 0.4198(7)  | 0.033(5)                           |
| O3           | 0.7961(7)  | 0.6033(7)  | 0.5499(5)  | 0.035(4)                           |
| O4           | 0.7049(10) | 1/2        | 0.6327(8)  | 0.037(6)                           |
| O5           | 1          | 0.5695(9)  | 0.5419(7)  | 0.031(5)                           |
| O6           | 0.8990(6)  | 0.6164(6)  | 0.4890(5)  | 0.028(4)                           |
| O7           | 1.0620(9)  | 1/2        | 0.4686(7)  | 0.024(5)                           |
| O8           | 1          | 0.7073(9)  | 0.6376(7)  | 0.028(5)                           |
| O9           | 0.8976(7)  | 0.7711(7)  | 0.5923(5)  | 0.031(4)                           |
| O10          | 0.7893(7)  | 0.6122(7)  | 0.7591(5)  | 0.034(4)                           |
| O11          | 0.7946(6)  | 0.6930(6)  | 0.6083(5)  | 0.026(3)                           |
| O12          | 0.9388(6)  | 0.6708(6)  | 0.4906(5)  | 0.029(4)                           |
| O13          | 0.8886(7)  | 0.6942(8)  | 0.8088(6)  | 0.042(4)                           |
| O14          | 1.0627(7)  | 0.8120(7)  | 0.6797(6)  | 0.039(4)                           |
| O15          | 0.8134(6)  | 0.5743(6)  | 0.6525(5)  | 0.028(4)                           |
| O16          | 0.9121(6)  | 0.6402(6)  | 0.5901(5)  | 0.021(3)                           |

Table S7 - Final Coordinates and Equivalent Isotropic Displacement Parameters of the non-Hydrogen atoms For U30

| Atom<br>---- | x<br>---   | y<br>---   | z<br>---   | U(eq) [Ang <sup>2</sup> ]<br>----- |
|--------------|------------|------------|------------|------------------------------------|
| O17          | 0.6903(7)  | 0.6093(7)  | 0.6947(6)  | 0.040(4)                           |
| O18          | 0.9397(7)  | 0.7606(7)  | 0.5532(6)  | 0.044(4)                           |
| O19          | 0.6516(7)  | 0.6925(7)  | 0.7643(6)  | 0.040(4)                           |
| O20          | 0.7227(7)  | 0.6658(7)  | 0.6822(5)  | 0.035(4)                           |
| O21          | 0.9300(8)  | 0.6224(8)  | 0.8970(6)  | 0.051(5)                           |
| O22          | 0.8967(8)  | 0.8178(8)  | 0.7722(6)  | 0.048(5)                           |
| O23          | 1          | 0.8943(11) | 0.7450(8)  | 0.042(6)                           |
| O24          | 0.6822(7)  | 0.6213(7)  | 0.5924(5)  | 0.032(4)                           |
| O25          | 0.8605(10) | 1/2        | 0.8998(8)  | 0.043(6)                           |
| O26          | 0.6894(9)  | 0.6028(9)  | 0.8306(7)  | 0.060(5)                           |
| O27          | 0.7721(11) | 1/2        | 0.8198(9)  | 0.043(6)                           |
| O28          | 1          | 0.8626(9)  | 0.5979(7)  | 0.030(5)                           |
| O29          | 0.7388(9)  | 1/2        | 0.5886(7)  | 0.029(5)                           |
| O30          | 0.7743(8)  | 0.7454(8)  | 0.7715(6)  | 0.049(5)                           |
| O31          | 0.7308(7)  | 0.4677(7)  | 0.9164(6)  | 0.039(4)                           |
| O32          | 0.7576(8)  | 0.7165(8)  | 0.8196(6)  | 0.049(5)                           |
| O33          | 0.8152(7)  | 0.8268(7)  | 0.8506(6)  | 0.040(4)                           |
| O34          | 1          | 0.7329(10) | 0.7475(8)  | 0.036(6)                           |
| O35          | 0.9371(7)  | 0.8189(7)  | 0.8145(6)  | 0.039(4)                           |
| O36          | 0.8976(8)  | 0.7536(8)  | 0.9057(7)  | 0.054(5)                           |
| O37          | 0.6275(13) | 1/2        | 0.8644(10) | 0.063(8)                           |
| O38          | 0.8341(9)  | 0.7181(9)  | 0.9029(7)  | 0.062(6)                           |
| O39          | 0.8846(9)  | 0.6975(9)  | 0.9973(8)  | 0.069(6)                           |
| O40          | 0.6664(9)  | 0.5684(9)  | 0.7867(7)  | 0.059(5)                           |
| O41          | 1          | 0.7109(15) | 0.9557(12) | 0.087(10)                          |
| O42          | 0.8885(10) | 0.4297(10) | 0.9876(8)  | 0.078(7)                           |

Table S7 - Final Coordinates and Equivalent Isotropic Displacement Parameters of the non-Hydrogen atoms For U30

| Atom | x          | y          | z          | U(eq) [Ang <sup>2</sup> ] |
|------|------------|------------|------------|---------------------------|
| ---- | ---        | ---        | ---        | -----                     |
| O43  | 1          | 0.6387(13) | 0.9844(10) | 0.068(8)                  |
| O44  | 0.7778(14) | 1/2        | 1.0048(11) | 0.076(9)                  |
| O45  | 0.8161(12) | 0.6030(12) | 0.9569(9)  | 0.097(8)                  |
| Mg1  | 0.8284(4)  | 0.6804(5)  | 0.3731(3)  | 0.053(3)                  |
| O46  | 0.7549(9)  | 0.6453(9)  | 0.3407(7)  | 0.069(6)                  |
| O47  | 0.8223(12) | 0.7572(12) | 0.3314(9)  | 0.098(8)                  |
| O48  | 0.7716(7)  | 0.7172(8)  | 0.4226(6)  | 0.041(4)                  |
| O49  | 0.9019(8)  | 0.7181(8)  | 0.4076(6)  | 0.048(5)                  |
| O50  | 0.8372(9)  | 0.6031(9)  | 0.4100(7)  | 0.059(5)                  |
| O51  | 0.8801(15) | 0.6413(14) | 0.3210(12) | 0.132(11)                 |
| O52  | 0.9102(12) | 1/2        | 0.6062(10) | 0.064(8)                  |
| O53  | 0.8642(13) | 1/2        | 0.7253(10) | 0.069(8)                  |
| O54  | 0.7095(9)  | 0.6293(8)  | 0.4813(7)  | 0.057(5)                  |
| O55  | 1          | 0.5758(16) | 0.6463(12) | 0.094(11)                 |
| O56  | 1          | 0.6217(15) | 0.7979(11) | 0.079(9)                  |
| O57  | 1.1018(13) | 1/2        | 0.3773(11) | 0.073(9)                  |
| O58  | 1.1545(9)  | 0.7384(9)  | 0.6883(7)  | 0.069(6)                  |

Table S7 - Final Coordinates and Equivalent Isotropic Displacement  
Parameters of the non-Hydrogen atoms  
For U30

| Atom | x          | y          | z          | U(eq) [Ang <sup>2</sup> ] |
|------|------------|------------|------------|---------------------------|
| ---- | ---        | ---        | ---        | -----                     |
| O59  | 0.8913(10) | 0.5631(11) | 0.8131(8)  | 0.081(7)                  |
| O60  | 1.1717(15) | 1/2        | 0.5092(12) | 0.088(10)                 |
| O61  | 1.0848(11) | 0.6267(11) | 0.7035(8)  | 0.087(7)                  |
| O62  | 0.5830(18) | 1/2        | 0.6114(14) | 0.115(14)                 |
| O63  | 0.674(2)   | 1/2        | 0.5113(17) | 0.141(17)                 |
| O64  | 0.7553(15) | 0.7812(15) | 0.9486(12) | 0.136(11)                 |
| O65  | 1          | 1/2        | 0.8730(19) | 0.099(17)                 |
| O66  | 1          | 1/2        | 0.7515(18) | 0.094(16)                 |
| O67  | 0.5622(16) | 0.6141(15) | 0.6773(12) | 0.144(12)                 |
| O68  | 0.8378(13) | 0.8772(13) | 0.5858(11) | 0.112(9)                  |
| O69  | 1          | 0.736(2)   | 0.3456(17) | 0.145(18)                 |
| O70  | 0.8615(16) | 0.9431(17) | 0.5077(13) | 0.158(13)                 |
| O71  | 0.8742(18) | 0.9176(17) | 0.6687(14) | 0.172(15)                 |

Table S7 - Final Coordinates and Equivalent Isotropic Displacement  
Parameters of the non-Hydrogen atoms  
For U30

| Atom | x        | y        | z          | U(eq) [Ang^2] |
|------|----------|----------|------------|---------------|
| ---- | ---      | ---      | ---        | -----         |
| O72  | 1        | 1        | 0.8639(19) | 0.099(17)     |
| O73  | 0.719(2) | 0.853(2) | 0.7664(16) | 0.188(17)     |
| O74  | 0.647(2) | 0.739(2) | 0.9822(16) | 0.187(17)     |
| Li1  | 1        | 1/2      | 0.596(4)   | 0.07(3)       |

U(eq) = 1/3 of the trace of the orthogonalized U Tensor

Table S8 - (An)isotropic Displacement Parameters  
For U30

| Atom | U(1,1) or U | U(2,2)     | U(3,3)    | U(2,3)     | U(1,3)     | U(1,2)    |
|------|-------------|------------|-----------|------------|------------|-----------|
| U1   | 0.0210(4)   | 0.0253(5)  | 0.0343(5) | 0.0023(4)  | -0.0015(4) | 0.0031(4) |
| U2   | 0.0160(6)   | 0.0249(7)  | 0.0348(7) | 0.0007(6)  | 0          | 0         |
| U3   | 0.0269(7)   | 0.0269(7)  | 0.0389(8) | -0.0019(6) | 0          | 0         |
| U4   | 0.0232(5)   | 0.0286(5)  | 0.0338(5) | 0.0011(4)  | 0.0016(4)  | 0.0039(4) |
| U5   | 0.0372(6)   | 0.0384(6)  | 0.0374(6) | 0.0001(5)  | 0.0070(5)  | 0.0062(4) |
| U6   | 0.0427(9)   | 0.0401(8)  | 0.0377(8) | 0          | 0.0095(7)  | 0         |
| U7   | 0.0357(8)   | 0.0412(8)  | 0.0414(8) | -0.0085(7) | 0          | 0         |
| U8   | 0.0557(7)   | 0.0525(7)  | 0.0399(6) | -0.0044(6) | 0.0046(6)  | 0.0010(5) |
| U9   | 0.0490(9)   | 0.0750(12) | 0.0402(9) | 0          | 0.0086(8)  | 0         |
| U10  | 0.0462(6)   | 0.0505(7)  | 0.0403(6) | -0.0080(5) | 0.0064(5)  | 0.0087(5) |
| Mg1  | 0.039(5)    | 0.078(7)   | 0.041(6)  | -0.008(5)  | -0.001(4)  | 0.024(5)  |

=====

The Temperature Factor has the Form of  $\text{Exp}(-T)$  Where  
 $T = 8 \cdot (\text{Pi}^2) \cdot U \cdot (\text{Sin}(\text{Theta}) / \text{Lambda})^2$  for Isotropic Atoms  
 $T = 2 \cdot (\text{Pi}^2) \cdot \text{Sum}_{ij} (h(i) \cdot h(j) \cdot U(i,j) \cdot \text{Astar}(i) \cdot \text{Astar}(j))$ , for  
Anisotropic Atoms.  $\text{Astar}(i)$  are Reciprocal Axial Lengths and  
 $h(i)$  are the Reflection Indices.

Table S9 - Bond Distances (Angstrom)  
For U30

|    |        |           |    |        |           |
|----|--------|-----------|----|--------|-----------|
| U1 | -O1    | 1.781(14) | U4 | -O17   | 2.466(17) |
| U1 | -O3    | 2.393(16) | U4 | -O20   | 2.377(15) |
| U1 | -O6    | 2.406(14) | U4 | -O24   | 1.775(15) |
| U1 | -O9    | 2.408(15) | U4 | -O29   | 2.385(8)  |
| U1 | -O11   | 2.361(14) | U5 | -O10   | 1.775(16) |
| U1 | -O12   | 2.350(14) | U5 | -O17   | 2.288(17) |
| U1 | -O16   | 1.772(14) | U5 | -O19   | 1.784(16) |
| U1 | -O18   | 2.360(16) | U5 | -O20   | 2.338(15) |
| U2 | -O2    | 1.79(2)   | U5 | -O26   | 2.37(2)   |
| U2 | -O5    | 1.80(2)   | U5 | -O30   | 2.401(18) |
| U2 | -O6    | 2.366(13) | U5 | -O32   | 2.331(18) |
| U2 | -O7    | 2.386(12) | U5 | -O40   | 2.35(2)   |
| U2 | -O12   | 2.356(13) | U6 | -O26   | 2.33(2)   |
| U2 | -O7_a  | 2.386(12) | U6 | -O27   | 1.76(2)   |
| U2 | -O6_b  | 2.366(13) | U6 | -O31   | 2.337(17) |
| U2 | -O12_b | 2.356(13) | U6 | -O37   | 1.71(3)   |
| U3 | -O8    | 1.82(2)   | U6 | -O40   | 2.36(2)   |
| U3 | -O9    | 2.405(16) | U6 | -O26_c | 2.33(2)   |
| U3 | -O14   | 2.389(17) | U6 | -O31_c | 2.337(17) |
| U3 | -O18   | 2.327(17) | U6 | -O40_c | 2.36(2)   |
| U3 | -O28   | 1.84(2)   | U7 | -O14   | 2.428(17) |
| U3 | -O9_b  | 2.405(16) | U7 | -O22   | 2.408(18) |
| U3 | -O14_b | 2.389(17) | U7 | -O23   | 1.81(2)   |
| U3 | -O18_b | 2.327(17) | U7 | -O34   | 1.79(2)   |
| U4 | -O3    | 2.362(15) | U7 | -O35   | 2.376(17) |
| U4 | -O4    | 2.385(9)  | U7 | -O14_b | 2.428(17) |
| U4 | -O11   | 2.417(13) | U7 | -O22_b | 2.408(18) |
| U4 | -O15   | 1.787(14) | U7 | -O35_b | 2.376(17) |



Table S9 - Bond Distances (Angstrom)  
For U30

|     |        |           |     |        |           |
|-----|--------|-----------|-----|--------|-----------|
| U8  | -O21   | 1.753(18) | U10 | -O33   | 1.804(16) |
| U8  | -O36   | 2.391(18) | U10 | -O35   | 2.352(16) |
| U8  | -O38   | 2.43(2)   | U10 | -O36   | 2.41(2)   |
| U8  | -O39   | 1.75(2)   | U10 | -O38   | 2.33(2)   |
| U8  | -O41   | 2.355(16) | Mg1 | -O51   | 2.09(3)   |
| U8  | -O43   | 2.384(15) | Mg1 | -O48   | 2.081(19) |
| U8  | -O45   | 2.44(3)   | Mg1 | -O46   | 2.04(2)   |
| U8  | -O42_c | 2.38(2)   | Mg1 | -O47   | 2.10(3)   |
| U9  | -O25   | 1.80(2)   | Mg1 | -O49   | 2.10(2)   |
| U9  | -O31   | 2.369(16) | Mg1 | -O50   | 2.04(2)   |
| U9  | -O42   | 2.40(2)   | O4  | -O29   | 1.48(3)   |
| U9  | -O44   | 1.76(3)   | O6  | -O12   | 1.504(19) |
| U9  | -O45   | 2.30(3)   | O9  | -O18   | 1.49(2)   |
| U9  | -O31_c | 2.369(16) | O17 | -O20   | 1.50(2)   |
| U9  | -O42_c | 2.40(2)   | O22 | -O35   | 1.52(2)   |
| U9  | -O45_c | 2.30(3)   | O26 | -O40   | 1.57(3)   |
| U10 | -O13   | 1.787(17) | O30 | -O32   | 1.58(2)   |
| U10 | -O22   | 2.341(18) | O31 | -O31_c | 1.44(2)   |
| U10 | -O30   | 2.452(18) | O36 | -O38   | 1.63(3)   |
| U10 | -O32   | 2.342(18) |     |        |           |

Table S10 - Bond Angles (Degrees)  
For U30

|     |     |      |          |      |     |        |          |
|-----|-----|------|----------|------|-----|--------|----------|
| O1  | -U1 | -O3  | 89.0(6)  | O2   | -U2 | -O5    | 176.7(9) |
| O1  | -U1 | -O6  | 91.6(6)  | O2   | -U2 | -O6    | 93.1(4)  |
| O1  | -U1 | -O9  | 92.3(6)  | O2   | -U2 | -O7    | 88.0(7)  |
| O1  | -U1 | -O11 | 88.6(6)  | O2   | -U2 | -O12   | 90.0(6)  |
| O1  | -U1 | -O12 | 89.6(6)  | O2   | -U2 | -O7_a  | 88.0(7)  |
| O1  | -U1 | -O16 | 177.2(6) | O2   | -U2 | -O6_b  | 93.1(4)  |
| O1  | -U1 | -O18 | 91.7(6)  | O2   | -U2 | -O12_b | 90.0(6)  |
| O3  | -U1 | -O6  | 74.6(5)  | O5   | -U2 | -O6    | 87.9(4)  |
| O3  | -U1 | -O9  | 142.3(5) | O5   | -U2 | -O7    | 89.3(7)  |
| O3  | -U1 | -O11 | 66.9(5)  | O5   | -U2 | -O12   | 92.7(6)  |
| O3  | -U1 | -O12 | 111.4(5) | O5   | -U2 | -O7_a  | 89.3(7)  |
| O3  | -U1 | -O16 | 89.1(6)  | O5   | -U2 | -O6_b  | 87.9(4)  |
| O3  | -U1 | -O18 | 178.5(5) | O5   | -U2 | -O12_b | 92.7(6)  |
| O6  | -U1 | -O9  | 142.9(5) | O6   | -U2 | -O7    | 143.0(5) |
| O6  | -U1 | -O11 | 141.5(5) | O6   | -U2 | -O12   | 37.2(5)  |
| O6  | -U1 | -O12 | 36.9(5)  | O6   | -U2 | -O7_a  | 72.2(5)  |
| O6  | -U1 | -O16 | 89.9(6)  | O6   | -U2 | -O6_b  | 144.4(5) |
| O6  | -U1 | -O18 | 106.7(5) | O6   | -U2 | -O12_b | 107.9(5) |
| O9  | -U1 | -O11 | 75.5(5)  | O7   | -U2 | -O12   | 178.0(6) |
| O9  | -U1 | -O12 | 106.3(5) | O7   | -U2 | -O7_a  | 70.9(6)  |
| O9  | -U1 | -O16 | 88.0(6)  | O6_b | -U2 | -O7    | 72.2(5)  |
| O9  | -U1 | -O18 | 36.4(5)  | O7   | -U2 | -O12_b | 109.1(5) |
| O11 | -U1 | -O12 | 177.5(5) | O7_a | -U2 | -O12   | 109.1(5) |
| O11 | -U1 | -O16 | 88.8(6)  | O6_b | -U2 | -O12   | 107.9(5) |
| O11 | -U1 | -O18 | 111.9(5) | O12  | -U2 | -O12_b | 70.8(5)  |
| O12 | -U1 | -O16 | 93.0(6)  | O6_b | -U2 | -O7_a  | 143.0(5) |
| O12 | -U1 | -O18 | 70.0(5)  | O7_a | -U2 | -O12_b | 178.0(6) |
| O16 | -U1 | -O18 | 90.2(6)  | O6_b | -U2 | -O12_b | 37.2(5)  |

Table S10 - Bond Angles (Degrees) (continued)  
For U30

|       |     |        |          |     |     |      |          |
|-------|-----|--------|----------|-----|-----|------|----------|
| O8    | -U3 | -O9    | 89.2(4)  | O3  | -U4 | -O4  | 110.3(7) |
| O8    | -U3 | -O14   | 89.3(6)  | O3  | -U4 | -O11 | 66.4(5)  |
| O8    | -U3 | -O18   | 93.2(7)  | O3  | -U4 | -O15 | 94.1(6)  |
| O8    | -U3 | -O28   | 177.1(9) | O3  | -U4 | -O17 | 169.7(5) |
| O8    | -U3 | -O9_b  | 89.2(4)  | O3  | -U4 | -O20 | 135.7(5) |
| O8    | -U3 | -O14_b | 89.3(6)  | O3  | -U4 | -O24 | 85.9(6)  |
| O8    | -U3 | -O18_b | 93.2(7)  | O3  | -U4 | -O29 | 74.2(6)  |
| O9    | -U3 | -O14   | 144.0(5) | O4  | -U4 | -O11 | 176.5(6) |
| O9    | -U3 | -O18   | 36.6(5)  | O4  | -U4 | -O15 | 90.3(7)  |
| O9    | -U3 | -O28   | 91.7(4)  | O4  | -U4 | -O17 | 77.7(6)  |
| O9    | -U3 | -O9_b  | 143.6(5) | O4  | -U4 | -O20 | 113.7(6) |
| O9    | -U3 | -O14_b | 72.3(5)  | O4  | -U4 | -O24 | 90.7(7)  |
| O9    | -U3 | -O18_b | 107.2(5) | O4  | -U4 | -O29 | 36.2(7)  |
| O14   | -U3 | -O18   | 177.5(6) | O11 | -U4 | -O15 | 88.6(5)  |
| O14   | -U3 | -O28   | 88.4(6)  | O11 | -U4 | -O17 | 105.7(5) |
| O9_b  | -U3 | -O14   | 72.3(5)  | O11 | -U4 | -O20 | 69.7(5)  |
| O14   | -U3 | -O14_b | 71.7(5)  | O11 | -U4 | -O24 | 90.4(6)  |
| O14   | -U3 | -O18_b | 108.8(6) | O11 | -U4 | -O29 | 140.4(6) |
| O18   | -U3 | -O28   | 89.2(6)  | O15 | -U4 | -O17 | 92.4(6)  |
| O9_b  | -U3 | -O18   | 107.2(5) | O15 | -U4 | -O20 | 91.1(6)  |
| O14_b | -U3 | -O18   | 108.8(6) | O15 | -U4 | -O24 | 179.0(7) |
| O18   | -U3 | -O18_b | 70.6(6)  | O15 | -U4 | -O29 | 90.4(6)  |
| O9_b  | -U3 | -O28   | 91.7(4)  | O17 | -U4 | -O20 | 36.0(5)  |
| O14_b | -U3 | -O28   | 88.4(6)  | O17 | -U4 | -O24 | 87.6(6)  |
| O18_b | -U3 | -O28   | 89.2(6)  | O17 | -U4 | -O29 | 113.9(6) |
| O9_b  | -U3 | -O14_b | 144.0(5) | O20 | -U4 | -O24 | 88.3(6)  |
| O9_b  | -U3 | -O18_b | 36.6(5)  | O20 | -U4 | -O29 | 149.9(6) |
| O14_b | -U3 | -O18_b | 177.5(5) | O24 | -U4 | -O29 | 90.6(7)  |

Table S10 - Bond Angles (Degrees) (continued)  
For U30

|     |     |      |          |       |     |        |           |
|-----|-----|------|----------|-------|-----|--------|-----------|
| O10 | -U5 | -O17 | 89.7(6)  | O26   | -U6 | -O27   | 91.4(5)   |
| O10 | -U5 | -O19 | 178.5(7) | O26   | -U6 | -O31   | 118.4(6)  |
| O10 | -U5 | -O20 | 89.8(6)  | O26   | -U6 | -O37   | 88.2(5)   |
| O10 | -U5 | -O26 | 93.5(7)  | O26   | -U6 | -O40   | 39.1(7)   |
| O10 | -U5 | -O30 | 91.0(7)  | O26   | -U6 | -O26_c | 158.6(7)  |
| O10 | -U5 | -O32 | 92.7(7)  | O26   | -U6 | -O31_c | 82.5(6)   |
| O10 | -U5 | -O40 | 93.1(7)  | O26   | -U6 | -O40_c | 119.7(7)  |
| O17 | -U5 | -O19 | 88.8(7)  | O27   | -U6 | -O31   | 94.2(9)   |
| O17 | -U5 | -O20 | 37.8(6)  | O27   | -U6 | -O37   | 177.8(13) |
| O17 | -U5 | -O26 | 115.1(6) | O27   | -U6 | -O40   | 90.9(8)   |
| O17 | -U5 | -O30 | 127.3(6) | O26_c | -U6 | -O27   | 91.4(5)   |
| O17 | -U5 | -O32 | 166.0(6) | O27   | -U6 | -O31_c | 94.2(9)   |
| O17 | -U5 | -O40 | 76.3(6)  | O27   | -U6 | -O40_c | 90.9(8)   |
| O19 | -U5 | -O20 | 89.0(7)  | O31   | -U6 | -O37   | 87.9(10)  |
| O19 | -U5 | -O26 | 87.2(7)  | O31   | -U6 | -O40   | 157.1(6)  |
| O19 | -U5 | -O30 | 89.9(7)  | O26_c | -U6 | -O31   | 82.5(6)   |
| O19 | -U5 | -O32 | 88.8(7)  | O31   | -U6 | -O31_c | 35.9(5)   |
| O19 | -U5 | -O40 | 86.6(7)  | O31   | -U6 | -O40_c | 121.5(6)  |
| O20 | -U5 | -O26 | 152.7(6) | O37   | -U6 | -O40   | 87.5(9)   |
| O20 | -U5 | -O30 | 89.6(6)  | O26_c | -U6 | -O37   | 88.2(5)   |
| O20 | -U5 | -O32 | 128.4(6) | O31_c | -U6 | -O37   | 87.9(10)  |
| O20 | -U5 | -O40 | 114.0(6) | O37   | -U6 | -O40_c | 87.5(9)   |
| O26 | -U5 | -O30 | 117.4(6) | O26_c | -U6 | -O40   | 119.7(7)  |
| O26 | -U5 | -O32 | 78.5(7)  | O31_c | -U6 | -O40   | 121.5(6)  |
| O26 | -U5 | -O40 | 38.9(7)  | O40   | -U6 | -O40_c | 80.6(7)   |
| O30 | -U5 | -O32 | 38.9(6)  | O26_c | -U6 | -O31_c | 118.4(6)  |
| O30 | -U5 | -O40 | 156.1(6) | O26_c | -U6 | -O40_c | 39.1(7)   |
| O32 | -U5 | -O40 | 117.3(7) | O31_c | -U6 | -O40_c | 157.1(6)  |

Table S10 - Bond Angles (Degrees) (continued)  
For U30

|       |     |        |           |       |     |        |           |
|-------|-----|--------|-----------|-------|-----|--------|-----------|
| O14   | -U7 | -022   | 141.8(6)  | O21   | -U8 | -036   | 92.5(7)   |
| O14   | -U7 | -023   | 88.2(7)   | O21   | -U8 | -038   | 91.2(8)   |
| O14   | -U7 | -034   | 88.7(7)   | O21   | -U8 | -039   | 178.1(9)  |
| O14   | -U7 | -035   | 177.4(5)  | O21   | -U8 | -041   | 94.1(10)  |
| O14   | -U7 | -014_b | 70.3(5)   | O21   | -U8 | -043   | 91.4(9)   |
| O14   | -U7 | -022_b | 71.6(6)   | O21   | -U8 | -045   | 94.3(9)   |
| O14   | -U7 | -035_b | 108.6(5)  | O21   | -U8 | -042_c | 92.2(8)   |
| O22   | -U7 | -023   | 88.5(5)   | O36   | -U8 | -038   | 39.4(6)   |
| O22   | -U7 | -034   | 92.6(5)   | O36   | -U8 | -039   | 89.3(8)   |
| O22   | -U7 | -035   | 37.0(6)   | O36   | -U8 | -041   | 74.3(9)   |
| O14_b | -U7 | -022   | 71.6(6)   | O36   | -U8 | -043   | 119.2(8)  |
| O22   | -U7 | -022_b | 146.3(6)  | O36   | -U8 | -045   | 116.2(8)  |
| O22   | -U7 | -035_b | 109.4(6)  | O36   | -U8 | -042_c | 164.4(7)  |
| O23   | -U7 | -034   | 176.2(10) | O38   | -U8 | -039   | 89.8(8)   |
| O23   | -U7 | -035   | 89.4(7)   | O38   | -U8 | -041   | 113.6(9)  |
| O14_b | -U7 | -023   | 88.2(7)   | O38   | -U8 | -043   | 158.6(8)  |
| O22_b | -U7 | -023   | 88.5(5)   | O38   | -U8 | -045   | 77.1(8)   |
| O23   | -U7 | -035_b | 89.4(7)   | O38   | -U8 | -042_c | 125.6(7)  |
| O34   | -U7 | -035   | 93.7(7)   | O39   | -U8 | -041   | 87.0(10)  |
| O14_b | -U7 | -034   | 88.7(7)   | O39   | -U8 | -043   | 88.3(9)   |
| O22_b | -U7 | -034   | 92.6(5)   | O39   | -U8 | -045   | 84.3(9)   |
| O34   | -U7 | -035_b | 93.7(7)   | O39   | -U8 | -042_c | 85.9(9)   |
| O14_b | -U7 | -035   | 108.6(5)  | O41   | -U8 | -043   | 45.0(10)  |
| O22_b | -U7 | -035   | 109.4(6)  | O41   | -U8 | -045   | 166.2(10) |
| O35   | -U7 | -035_b | 72.4(6)   | O41   | -U8 | -042_c | 120.2(10) |
| O14_b | -U7 | -022_b | 141.8(6)  | O43   | -U8 | -045   | 123.9(9)  |
| O14_b | -U7 | -035_b | 177.4(5)  | O42_c | -U8 | -043   | 75.5(8)   |
| O22_b | -U7 | -035_b | 37.0(6)   | O42_c | -U8 | -045   | 48.6(8)   |

Table S10 - Bond Angles (Degrees) (continued)  
For U30

|       |     |        |           |     |      |      |          |
|-------|-----|--------|-----------|-----|------|------|----------|
| O25   | -U9 | -O31   | 91.9(8)   | O13 | -U10 | -O22 | 90.6(7)  |
| O25   | -U9 | -O42   | 92.0(8)   | O13 | -U10 | -O30 | 88.5(7)  |
| O25   | -U9 | -O44   | 178.0(13) | O13 | -U10 | -O32 | 91.4(7)  |
| O25   | -U9 | -O45   | 93.3(7)   | O13 | -U10 | -O33 | 178.6(8) |
| O25   | -U9 | -O31_c | 91.9(8)   | O13 | -U10 | -O35 | 91.5(7)  |
| O25   | -U9 | -O42_c | 92.0(8)   | O13 | -U10 | -O36 | 94.4(7)  |
| O25   | -U9 | -O45_c | 93.3(7)   | O13 | -U10 | -O38 | 93.7(7)  |
| O31   | -U9 | -O42   | 121.4(7)  | O22 | -U10 | -O30 | 82.9(6)  |
| O31   | -U9 | -O44   | 86.2(11)  | O22 | -U10 | -O32 | 121.0(6) |
| O31   | -U9 | -O45   | 107.0(8)  | O22 | -U10 | -O33 | 88.3(7)  |
| O31   | -U9 | -O31_c | 35.4(5)   | O22 | -U10 | -O35 | 37.8(6)  |
| O31   | -U9 | -O42_c | 156.7(7)  | O22 | -U10 | -O36 | 120.2(6) |
| O31   | -U9 | -O45_c | 71.7(8)   | O22 | -U10 | -O38 | 160.1(7) |
| O42   | -U9 | -O44   | 89.5(10)  | O30 | -U10 | -O32 | 38.3(6)  |
| O42   | -U9 | -O45   | 131.0(9)  | O30 | -U10 | -O33 | 90.6(7)  |
| O31_c | -U9 | -O42   | 156.7(7)  | O30 | -U10 | -O35 | 120.6(6) |
| O42   | -U9 | -O42_c | 81.4(8)   | O30 | -U10 | -O36 | 156.7(6) |
| O42   | -U9 | -O45_c | 49.8(8)   | O30 | -U10 | -O38 | 116.7(6) |
| O44   | -U9 | -O45   | 86.7(7)   | O32 | -U10 | -O33 | 88.5(7)  |
| O31_c | -U9 | -O44   | 86.2(11)  | O32 | -U10 | -O35 | 158.7(6) |
| O42_c | -U9 | -O44   | 89.5(10)  | O32 | -U10 | -O36 | 118.3(6) |
| O44   | -U9 | -O45_c | 86.7(7)   | O32 | -U10 | -O38 | 78.4(7)  |
| O31_c | -U9 | -O45   | 71.7(8)   | O33 | -U10 | -O35 | 88.2(6)  |
| O42_c | -U9 | -O45   | 49.8(8)   | O33 | -U10 | -O36 | 86.9(7)  |
| O45   | -U9 | -O45_c | 173.4(9)  | O33 | -U10 | -O38 | 87.6(7)  |
| O31_c | -U9 | -O42_c | 121.4(7)  | O35 | -U10 | -O36 | 82.5(6)  |
| O31_c | -U9 | -O45_c | 107.0(8)  | O35 | -U10 | -O38 | 122.5(7) |
| O42_c | -U9 | -O45_c | 131.0(9)  | O36 | -U10 | -O38 | 40.1(7)  |

Table S10 - Bond Angles (Degrees) (continued)  
For U30

|      |      |       |           |      |      |        |          |
|------|------|-------|-----------|------|------|--------|----------|
| O46  | -Mg1 | -O51  | 87.3(11)  | U1   | -O12 | -O6    | 73.6(8)  |
| O47  | -Mg1 | -O48  | 91.9(10)  | U2   | -O12 | -O6    | 71.8(7)  |
| O47  | -Mg1 | -O49  | 89.8(10)  | U3   | -O14 | -U7    | 107.0(6) |
| O47  | -Mg1 | -O50  | 176.2(11) | U4   | -O17 | -U5    | 128.2(7) |
| O47  | -Mg1 | -O51  | 87.8(12)  | U4   | -O17 | -O20   | 68.8(8)  |
| O48  | -Mg1 | -O49  | 89.5(8)   | U5   | -O17 | -O20   | 72.9(8)  |
| O48  | -Mg1 | -O50  | 91.9(8)   | U1   | -O18 | -U3    | 125.4(7) |
| O48  | -Mg1 | -O51  | 176.0(11) | U1   | -O18 | -O9    | 73.6(9)  |
| O49  | -Mg1 | -O50  | 90.9(8)   | U3   | -O18 | -O9    | 74.5(9)  |
| O49  | -Mg1 | -O51  | 94.5(11)  | U4   | -O20 | -U5    | 130.3(7) |
| O50  | -Mg1 | -O51  | 88.4(11)  | U4   | -O20 | -O17   | 75.3(9)  |
| O46  | -Mg1 | -O48  | 88.7(8)   | U5   | -O20 | -O17   | 69.3(9)  |
| O46  | -Mg1 | -O49  | 178.2(9)  | U7   | -O22 | -U10   | 126.1(8) |
| O46  | -Mg1 | -O47  | 89.9(10)  | U7   | -O22 | -O35   | 70.4(9)  |
| O46  | -Mg1 | -O50  | 89.6(9)   | U10  | -O22 | -O35   | 71.5(9)  |
| U1   | -O3  | -U4   | 110.3(6)  | U6   | -O26 | -O40   | 71.3(10) |
| U4   | -O4  | -U4_c | 130.7(10) | U5   | -O26 | -U6    | 124.5(9) |
| U4   | -O4  | -O29  | 71.9(6)   | U5   | -O26 | -O40   | 69.7(10) |
| U4_c | -O4  | -O29  | 71.9(6)   | U4_c | -O29 | -O4    | 71.9(6)  |
| U1   | -O6  | -U2   | 121.2(6)  | U4   | -O29 | -O4    | 71.9(6)  |
| U1   | -O6  | -O12  | 69.5(7)   | U4   | -O29 | -U4_c  | 130.8(9) |
| U2   | -O6  | -O12  | 71.0(7)   | U5   | -O30 | -U10   | 122.7(7) |
| U2   | -O7  | -U2_a | 106.4(8)  | U5   | -O30 | -O32   | 68.1(9)  |
| U1   | -O9  | -O18  | 70.1(8)   | U10  | -O30 | -O32   | 67.0(9)  |
| U3   | -O9  | -O18  | 68.8(9)   | U6   | -O31 | -U9    | 124.5(7) |
| U1   | -O9  | -U3   | 119.9(6)  | U6   | -O31 | -O31_c | 72.0(10) |
| U1   | -O11 | -U4   | 109.5(5)  | U9   | -O31 | -O31_c | 72.3(9)  |
| U1   | -O12 | -U2   | 124.1(6)  | U10  | -O32 | -O30   | 74.6(9)  |

Table S10 - Bond Angles (Degrees) (continued)  
For U30

|     |      |      |          |      |      |       |           |
|-----|------|------|----------|------|------|-------|-----------|
| U5  | -O32 | -U10 | 131.5(8) | U8   | -O38 | -O36  | 69.0(10)  |
| U5  | -O32 | -O30 | 73.0(9)  | U10  | -O38 | -O36  | 72.5(10)  |
| U7  | -O35 | -U10 | 127.0(7) | U5   | -O40 | -U6   | 124.5(9)  |
| U7  | -O35 | -O22 | 72.6(9)  | U5   | -O40 | -O26  | 71.4(10)  |
| U10 | -O35 | -O22 | 70.7(9)  | U6   | -O40 | -O26  | 69.6(10)  |
| U8  | -O36 | -U10 | 122.7(8) | U8   | -O41 | -U8_b | 122.2(14) |
| U8  | -O36 | -O38 | 71.7(10) | U8_c | -O42 | -U9   | 117.7(9)  |
| U10 | -O36 | -O38 | 67.4(10) | U8   | -O43 | -U8_b | 119.8(12) |
| U8  | -O38 | -U10 | 124.2(9) | U8   | -O45 | -U9   | 119.7(11) |



Table S11 - Crystal Data and Details of the Structure Determination  
For U36a

| Crystal Data                        |                                        |           |           |
|-------------------------------------|----------------------------------------|-----------|-----------|
| Formula                             | O180 U36, 2(I O5), 74(O), 16(K), 4(Li) |           |           |
| Formula Weight                      | 13700.24                               |           |           |
| Crystal System                      | Orthorhombic                           |           |           |
| Space group                         | Pmmn                                   | (No. 59)  |           |
| a, b, c [Angstrom]                  | 27.580(4)                              | 22.008(3) | 22.940(4) |
| V [Ang**3]                          | 13924(4)                               |           |           |
| Z                                   | 2                                      |           |           |
| D(calc) [g/cm**3]                   | 3.268                                  |           |           |
| Mu(MoKa) [ /mm ]                    | 21.426                                 |           |           |
| F(000)                              | 11692                                  |           |           |
| Crystal Size [mm]                   | 0.08 x 0.08 x 0.10                     |           |           |
| Data Collection                     |                                        |           |           |
| Temperature (K)                     | 120                                    |           |           |
| Radiation [Angstrom]                | MoKa                                   | 0.71073   |           |
| Theta Min-Max [Deg]                 | 1.5, 25.0                              |           |           |
| Dataset                             | -32: 32 ; -26: 26 ; -27: 27            |           |           |
| Tot., Uniq. Data, R(int)            | 153640,                                | 12957,    | 0.141     |
| Observed data [I > 2.0 sigma(I)]    | 7580                                   |           |           |
| Refinement                          |                                        |           |           |
| Nref, Npar                          | 12957, 445                             |           |           |
| R, wR2, S                           | 0.0462, 0.1344, 0.93                   |           |           |
| w = 1/[\s^2^(Fo^2^)+(0.0602P)^2^]   | where P=(Fo^2^+2Fc^2^)/3               |           |           |
| Max. and Av. Shift/Error            | 0.00, 0.00                             |           |           |
| Min. and Max. Resd. Dens. [e/Ang^3] | -1.42, 2.85                            |           |           |

Table S12 - Final Coordinates and Equivalent Isotropic Displacement  
Parameters of the non-Hydrogen atoms  
For U36a

| Atom<br>---- | x<br>---   | y<br>---   | z<br>---   | U(eq) [Ang <sup>2</sup> ]<br>----- |
|--------------|------------|------------|------------|------------------------------------|
| U1           | 0.68010(4) | 1/4        | 0.19314(5) | 0.0342(4)                          |
| U2           | 3/4        | 0.56773(5) | 0.65955(5) | 0.0311(4)                          |
| U3           | 3/4        | 0.33805(5) | 0.99191(5) | 0.0344(4)                          |
| U4           | 0.55167(3) | 0.34859(4) | 0.80987(3) | 0.0331(3)                          |
| U5           | 0.62666(3) | 0.51661(4) | 0.55871(3) | 0.0324(3)                          |
| U6           | 0.53519(3) | 0.40503(4) | 0.62918(3) | 0.0319(3)                          |
| U7           | 0.60311(3) | 0.38347(4) | 0.27743(3) | 0.0331(3)                          |
| U8           | 0.52116(4) | 1/4        | 0.35796(5) | 0.0340(4)                          |
| U9           | 0.67153(3) | 0.49648(3) | 0.37559(3) | 0.0322(3)                          |
| U10          | 0.49808(4) | 1/4        | 0.52564(5) | 0.0339(4)                          |
| U11          | 0.64354(3) | 0.43462(4) | 0.90729(3) | 0.0345(3)                          |
| U12          | 3/4        | 0.53797(5) | 0.82633(5) | 0.0348(4)                          |
| O1           | 0.5955(4)  | 0.4534(6)  | 0.3551(5)  | 0.031(3)                           |
| O2           | 3/4        | 0.3526(8)  | 1.0667(8)  | 0.036(5)                           |
| O3           | 0.7021(5)  | 0.5617(6)  | 0.7449(6)  | 0.040(4)                           |
| O4           | 0.6693(5)  | 0.4544(6)  | 0.2809(6)  | 0.037(3)                           |
| O5           | 0.5885(5)  | 0.4440(6)  | 0.8300(6)  | 0.038(4)                           |
| O6           | 0.4809(5)  | 0.4505(6)  | 0.6318(6)  | 0.039(4)                           |
| O7           | 0.5901(4)  | 0.3604(6)  | 0.6275(5)  | 0.034(3)                           |
| O8           | 0.6633(5)  | 0.4498(6)  | 0.5666(6)  | 0.036(3)                           |
| O9           | 0.5133(5)  | 0.3558(6)  | 0.7160(5)  | 0.035(3)                           |
| O10          | 0.6666(5)  | 0.5388(6)  | 0.4707(6)  | 0.040(4)                           |
| O11          | 0.6687(5)  | 0.5703(6)  | 0.6329(6)  | 0.037(3)                           |
| O12          | 0.6911(5)  | 0.4260(6)  | 0.4076(5)  | 0.034(3)                           |
| O13          | 0.7002(5)  | 0.5132(6)  | 0.9066(6)  | 0.037(3)                           |
| O14          | 0.6683(7)  | 1/4        | 0.1167(8)  | 0.040(5)                           |

Table S12 - Final Coordinates and Equivalent Isotropic Displacement Parameters of the non-Hydrogen atoms (continued)  
For U36a

| Atom<br>---- | x<br>---  | y<br>---  | z<br>---  | U(eq) [Ang <sup>2</sup> ]<br>----- |
|--------------|-----------|-----------|-----------|------------------------------------|
| O15          | 3/4       | 0.3102(9) | 0.1809(8) | 0.041(5)                           |
| O16          | 0.6802(5) | 0.3910(6) | 0.8589(5) | 0.034(3)                           |
| O17          | 0.5395(5) | 0.3130(6) | 0.2780(6) | 0.036(3)                           |
| O18          | 0.5887(5) | 0.3519(6) | 0.9061(5) | 0.036(3)                           |
| O19          | 3/4       | 0.3205(8) | 0.9152(8) | 0.039(5)                           |
| O20          | 0.6544(5) | 0.3542(6) | 0.1980(5) | 0.034(3)                           |
| O21          | 0.5858(5) | 0.4907(6) | 0.6465(5) | 0.036(3)                           |
| O22          | 0.5602(5) | 0.4522(6) | 0.5412(6) | 0.042(4)                           |
| O23          | 0.6069(4) | 0.3246(5) | 0.7770(5) | 0.031(3)                           |
| O24          | 3/4       | 0.4874(8) | 0.6540(8) | 0.040(5)                           |
| O25          | 0.5899(5) | 0.5837(6) | 0.5509(6) | 0.041(4)                           |
| O26          | 0.5407(7) | 1/4       | 0.8515(8) | 0.037(5)                           |
| O27          | 0.4597(7) | 1/4       | 0.3347(8) | 0.043(5)                           |
| O28          | 0.6508(5) | 0.5661(6) | 0.3454(6) | 0.035(3)                           |
| O29          | 0.4328(6) | 1/4       | 0.5204(8) | 0.033(5)                           |
| O30          | 3/4       | 0.4606(8) | 0.7996(8) | 0.034(5)                           |
| O31          | 0.5381(5) | 0.4150(6) | 0.7322(6) | 0.038(4)                           |
| O32          | 0.5302(5) | 0.3546(6) | 0.3302(6) | 0.039(4)                           |
| O33          | 0.7024(7) | 1/4       | 1.0064(8) | 0.037(5)                           |
| O34          | 0.6120(5) | 0.3136(6) | 0.2031(6) | 0.040(4)                           |
| O35          | 0.6383(4) | 0.3385(5) | 0.3270(5) | 0.028(3)                           |
| O36          | 3/4       | 0.5121(8) | 0.3349(8) | 0.035(5)                           |
| O37          | 3/4       | 0.5386(8) | 0.3945(8) | 0.036(5)                           |
| O38          | 3/4       | 0.6481(9) | 0.6668(8) | 0.044(5)                           |
| O39          | 0.4977(5) | 0.3522(6) | 0.5514(5) | 0.035(3)                           |
| O40          | 0.6977(5) | 0.5759(6) | 0.5777(6) | 0.037(3)                           |

Table S12 - Final Coordinates and Equivalent Isotropic Displacement Parameters of the non-Hydrogen atoms (continued)  
For U36a

| Atom | x           | y           | z           | U(eq) [Ang <sup>2</sup> ] |
|------|-------------|-------------|-------------|---------------------------|
| ---- | ---         | ---         | ---         | -----                     |
| O41  | 0.6932(6)   | 1/4         | 0.2698(7)   | 0.029(4)                  |
| O42  | 0.5825(6)   | 1/4         | 0.3855(7)   | 0.032(5)                  |
| O43  | 0.5690(5)   | 0.4333(6)   | 0.2308(5)   | 0.037(3)                  |
| O44  | 0.6195(5)   | 0.5068(6)   | 0.4562(6)   | 0.040(4)                  |
| O45  | 0.4963(5)   | 0.3743(6)   | 0.8422(6)   | 0.037(3)                  |
| O46  | 0.4892(5)   | 0.3178(6)   | 0.6071(6)   | 0.038(3)                  |
| O47  | 0.7005(5)   | 0.4234(6)   | 0.9819(6)   | 0.040(4)                  |
| O48  | 0.6045(5)   | 0.4776(6)   | 0.9555(6)   | 0.041(4)                  |
| O49  | 0.5626(7)   | 1/4         | 0.5339(9)   | 0.048(6)                  |
| O50  | 0.6670(5)   | 0.3720(6)   | 0.9879(6)   | 0.037(3)                  |
| O51  | 0.6662(5)   | 0.5252(6)   | 0.8567(6)   | 0.041(4)                  |
| O52  | 3/4         | 0.6160(10)  | 0.8506(10)  | 0.062(7)                  |
| O53  | 0.5018(5)   | 0.3112(6)   | 0.4400(6)   | 0.046(4)                  |
| O54  | 0.5183(7)   | 1/4         | 0.7906(8)   | 0.041(5)                  |
| *I1  | 0.69933(14) | 1/4         | 0.78031(18) | 0.0403(12)                |
| O56  | 0.6761(5)   | 1/4         | 0.8442(6)   | 0.016(4)                  |
| O58  | 3/4         | 0.3147(10)  | 0.7810(10)  | 0.059(6)                  |
| *O60 | 0.6799(14)  | 1/4         | 0.6986(17)  | 0.047(11)                 |
| *I2  | 3/4         | 0.31537(17) | 0.40613(16) | 0.0333(12)                |
| O55  | 3/4         | 0.3415(6)   | 0.3412(6)   | 0.009(3)                  |
| O57  | 0.7008(8)   | 1/4         | 0.4060(10)  | 0.059(6)                  |
| *O59 | 3/4         | 0.3367(14)  | 0.4835(14)  | 0.023(8)                  |
| O61  | 0.6505(4)   | 0.4516(5)   | 0.7329(5)   | 0.021(3)                  |

Table S12 - Final Coordinates and Equivalent Isotropic Displacement Parameters of the non-Hydrogen atoms (continued)  
For U36a

| Atom<br>---- | x<br>---   | y<br>---   | z<br>---   | U(eq) [Ang <sup>2</sup> ]<br>----- |
|--------------|------------|------------|------------|------------------------------------|
| O62          | 0.5118(5)  | 0.4408(6)  | 0.4406(6)  | 0.044(4)                           |
| O63          | 0.4293(9)  | 1/4        | 0.7021(10) | 0.071(7)                           |
| O64          | 0.4523(6)  | 0.4154(7)  | 0.2921(7)  | 0.063(5)                           |
| O65          | 0.6286(7)  | 0.4028(8)  | 0.0924(8)  | 0.080(6)                           |
| O66          | 0.6936(7)  | 0.3779(8)  | 0.6858(8)  | 0.080(6)                           |
| O67          | 0.6815(7)  | 0.6789(9)  | 0.5035(8)  | 0.094(6)                           |
| O68          | 0.5287(7)  | 0.5452(9)  | 0.8229(9)  | 0.099(7)                           |
| O69          | 0.6617(9)  | 0.3165(11) | 0.5325(11) | 0.131(9)                           |
| O70          | 0.6053(8)  | 0.6202(10) | 0.8778(9)  | 0.114(8)                           |
| O71          | 0.6215(13) | 1/4        | 0.9497(15) | 0.134(13)                          |
| O72          | 3/4        | 0.6625(12) | 0.4078(11) | 0.086(8)                           |
| O73          | 3/4        | 0.6007(15) | 0.2535(14) | 0.119(11)                          |
| O74          | 3/4        | 0.4146(16) | 0.2393(15) | 0.138(13)                          |

Table S12 - Final Coordinates and Equivalent Isotropic Displacement Parameters of the non-Hydrogen atoms (continued)  
For U36a

| Atom | x           | y          | z          | U(eq) [Ang <sup>2</sup> ] |
|------|-------------|------------|------------|---------------------------|
| ---- | ---         | ---        | ---        | -----                     |
| O75  | 0.5198(8)   | 0.3535(10) | 0.9922(9)  | 0.107(7)                  |
| O76  | 0.4758(12)  | 1/4        | 0.9411(15) | 0.128(12)                 |
| O77  | 0.6215(9)   | 0.6831(12) | 0.6350(11) | 0.139(9)                  |
| O78  | 0.6536(9)   | 0.5363(11) | 0.1979(11) | 0.136(9)                  |
| O79  | 0.4193(15)  | 1/4        | 0.7964(17) | 0.162(15)                 |
| O80  | 0.6950(13)  | 0.5978(17) | 0.9908(16) | 0.223(16)                 |
| O81  | 0.4457(14)  | 0.5050(16) | 0.8913(16) | 0.222(16)                 |
| O82  | 0.6367(14)  | 0.6636(16) | 0.7555(16) | 0.236(16)                 |
| K1   | 0.5999(2)   | 0.3626(3)  | 0.4517(3)  | 0.065(2)                  |
| K2   | 0.5807(3)   | 1/4        | 0.6768(3)  | 0.048(3)                  |
| K3   | 0.60012(18) | 0.6321(2)  | 0.4343(2)  | 0.0510(19)                |
| K4   | 3/4         | 0.4622(3)  | 0.5086(3)  | 0.045(3)                  |
| K5   | 0.4385(3)   | 0.4397(4)  | 0.7511(4)  | 0.113(4)                  |

Table S12 - Final Coordinates and Equivalent Isotropic Displacement  
Parameters of the non-Hydrogen atoms (continued)  
For U36a

| Atom | x          | y        | z        | U(eq) [Ang^2] |
|------|------------|----------|----------|---------------|
| ---- | ---        | ---      | ---      | -----         |
| Li1  | 0.6506(17) | 1/4      | 0.343(2) | 0.034(12)     |
| Li2  | 3/4        | 0.371(3) | 0.837(3) | 0.059(16)     |

U(eq) = 1/3 of the trace of the orthogonalized U Tensor

Starred Atom sites have a S.O.F less than 1.0

Table S13 - (An)isotropic Displacement Parameters  
For U36a

| Atom | U(1,1) or U | U(2,2)    | U(3,3)    | U(2,3)     | U(1,3)     | U(1,2)     |
|------|-------------|-----------|-----------|------------|------------|------------|
| U1   | 0.0261(6)   | 0.0453(7) | 0.0311(6) | 0          | -0.0004(5) | 0          |
| U2   | 0.0262(6)   | 0.0289(6) | 0.0383(7) | 0.0016(5)  | 0          | 0          |
| U3   | 0.0337(7)   | 0.0385(7) | 0.0310(6) | 0.0006(5)  | 0          | 0          |
| U4   | 0.0288(4)   | 0.0351(5) | 0.0355(5) | -0.0008(4) | 0.0032(4)  | 0.0025(4)  |
| U5   | 0.0236(4)   | 0.0358(5) | 0.0379(5) | 0.0031(4)  | -0.0020(4) | -0.0005(3) |
| U6   | 0.0228(4)   | 0.0349(5) | 0.0381(5) | 0.0032(4)  | -0.0029(4) | -0.0004(3) |
| U7   | 0.0249(4)   | 0.0406(5) | 0.0338(5) | 0.0035(4)  | -0.0025(4) | 0.0011(4)  |
| U8   | 0.0268(6)   | 0.0368(7) | 0.0383(7) | 0          | 0.0014(5)  | 0          |
| U9   | 0.0237(4)   | 0.0356(5) | 0.0373(5) | 0.0032(4)  | -0.0014(4) | 0.0024(3)  |
| U10  | 0.0245(6)   | 0.0372(7) | 0.0400(7) | 0          | 0.0040(5)  | 0          |
| U11  | 0.0334(5)   | 0.0358(5) | 0.0343(5) | -0.0010(4) | 0.0026(4)  | 0.0025(4)  |
| U12  | 0.0355(7)   | 0.0323(7) | 0.0366(7) | -0.0011(5) | 0          | 0          |
| I1   | 0.035(2)    | 0.042(2)  | 0.044(2)  | 0          | 0.0009(19) | 0          |
| I2   | 0.027(2)    | 0.037(2)  | 0.036(2)  | 0.0010(18) | 0          | 0          |
| K1   | 0.058(4)    | 0.064(4)  | 0.072(4)  | -0.005(3)  | 0.006(3)   | -0.012(3)  |
| K2   | 0.062(5)    | 0.036(4)  | 0.047(4)  | 0          | -0.008(4)  | 0          |
| K3   | 0.040(3)    | 0.050(3)  | 0.063(4)  | 0.003(3)   | 0.006(3)   | 0.016(2)   |
| K4   | 0.025(4)    | 0.059(5)  | 0.052(5)  | 0.000(4)   | 0          | 0          |
| K5   | 0.075(5)    | 0.107(6)  | 0.156(8)  | 0.025(6)   | 0.036(5)   | 0.036(4)   |

=====

The Temperature Factor has the Form of  $\text{Exp}(-T)$  Where  
 $T = 8 * (\text{Pi} ** 2) * U * (\text{Sin}(\text{Theta}) / \text{Lambda}) ** 2$  for Isotropic Atoms  
 $T = 2 * (\text{Pi} ** 2) * \text{Sum}ij(h(i) * h(j) * U(i, j) * \text{Astar}(i) * \text{Astar}(j))$ , for  
Anisotropic Atoms. Astar(i) are Reciprocal Axial Lengths and  
h(i) are the Reflection Indices.



Table S14 - Bond Distances (Angstrom)  
For U36a

|    |        |           |    |      |           |
|----|--------|-----------|----|------|-----------|
| U1 | -O14   | 1.784(18) | U4 | -O26 | 2.390(8)  |
| U1 | -O15   | 2.356(11) | U4 | -O31 | 2.335(14) |
| U1 | -O20   | 2.403(13) | U4 | -O45 | 1.790(14) |
| U1 | -O34   | 2.354(14) | U4 | -O54 | 2.398(8)  |
| U1 | -O41   | 1.795(16) | U5 | -O8  | 1.793(13) |
| U1 | -O15_g | 2.356(11) | U5 | -O10 | 2.351(14) |
| U1 | -O20_i | 2.403(13) | U5 | -O11 | 2.374(14) |
| U1 | -O34_i | 2.354(14) | U5 | -O21 | 2.377(12) |
| U2 | -O3    | 2.366(14) | U5 | -O22 | 2.352(14) |
| U2 | -O11   | 2.325(14) | U5 | -O25 | 1.800(13) |
| U2 | -O24   | 1.773(18) | U5 | -O40 | 2.394(14) |
| U2 | -O38   | 1.78(2)   | U5 | -O44 | 2.370(14) |
| U2 | -O40   | 2.375(14) | U6 | -O6  | 1.802(14) |
| U2 | -O3_h  | 2.366(14) | U6 | -O7  | 1.806(12) |
| U2 | -O11_h | 2.325(14) | U6 | -O9  | 2.346(12) |
| U2 | -O40_h | 2.375(14) | U6 | -O21 | 2.379(13) |
| U3 | -O2    | 1.745(18) | U6 | -O22 | 2.372(14) |
| U3 | -O19   | 1.802(18) | U6 | -O31 | 2.375(14) |
| U3 | -O33   | 2.364(11) | U6 | -O39 | 2.367(12) |
| U3 | -O47   | 2.333(13) | U6 | -O46 | 2.356(13) |
| U3 | -O50   | 2.410(14) | U7 | -O1  | 2.364(12) |
| U3 | -O33_g | 2.364(11) | U7 | -O4  | 2.403(14) |
| U3 | -O47_h | 2.333(13) | U7 | -O17 | 2.342(14) |
| U3 | -O50_h | 2.410(14) | U7 | -O20 | 2.395(12) |
| U4 | -O5    | 2.378(13) | U7 | -O32 | 2.432(14) |
| U4 | -O9    | 2.405(12) | U7 | -O34 | 2.309(14) |
| U4 | -O18   | 2.433(12) | U7 | -O35 | 1.793(11) |
| U4 | -O23   | 1.780(11) | U7 | -O43 | 1.798(13) |

Table S14 - Bond Distances (Angstrom) (continued)  
For U36a

|     |        |           |     |        |           |
|-----|--------|-----------|-----|--------|-----------|
| U8  | -O17   | 2.354(14) | U11 | -O47   | 2.336(14) |
| U8  | -O27   | 1.777(19) | U11 | -O48   | 1.810(14) |
| U8  | -O32   | 2.402(13) | U11 | -O50   | 2.395(14) |
| U8  | -O42   | 1.806(17) | U11 | -O51   | 2.390(13) |
| U8  | -O53   | 2.375(14) | U12 | -O3    | 2.347(14) |
| U8  | -O17_i | 2.354(14) | U12 | -O13   | 2.361(14) |
| U8  | -O32_i | 2.402(13) | U12 | -O30   | 1.810(18) |
| U8  | -O53_i | 2.375(14) | U12 | -O51   | 2.430(14) |
| U9  | -O1    | 2.349(11) | U12 | -O52   | 1.81(2)   |
| U9  | -O4    | 2.362(14) | U12 | -O3_h  | 2.347(14) |
| U9  | -O10   | 2.376(14) | U12 | -O13_h | 2.361(14) |
| U9  | -O12   | 1.799(13) | U12 | -O51_h | 2.430(14) |
| U9  | -O28   | 1.776(13) | I1  | -O58_a | 1.995(16) |
| U9  | -O36   | 2.382(8)  | I1  | -O58   | 1.995(16) |
| U9  | -O37   | 2.394(8)  | I1  | -O60   | 1.95(4)   |
| U9  | -O44   | 2.352(14) | I1  | -O56   | 1.600(14) |
| U10 | -O29   | 1.804(17) | I1  | -I1_a  | 2.795(5)  |
| U10 | -O39   | 2.326(13) | I2  | -O57   | 1.978(15) |
| U10 | -O46   | 2.404(14) | I2  | -O59   | 1.84(3)   |
| U10 | -O49   | 1.790(19) | I2  | -O55   | 1.597(14) |
| U10 | -O53   | 2.384(14) | I2  | -O57_d | 1.978(15) |
| U10 | -O39_i | 2.326(13) | I2  | -I2_d  | 2.877(5)  |
| U10 | -O46_i | 2.404(14) | O9  | -O31   | 1.518(19) |
| U10 | -O53_i | 2.384(14) | O10 | -O44   | 1.515(19) |
| U11 | -O5    | 2.343(14) | O11 | -O40   | 1.503(19) |
| U11 | -O13   | 2.331(14) | O13 | -O51   | 1.503(19) |
| U11 | -O16   | 1.782(13) | O17 | -O32   | 1.529(19) |
| U11 | -O18   | 2.367(13) | O20 | -O34   | 1.476(19) |

Table S14 - Bond Distances (Angstrom) (continued)  
For U36a

|     |      |         |     |      |           |
|-----|------|---------|-----|------|-----------|
| O26 | -O54 | 1.53(3) | O39 | -O46 | 1.504(18) |
| O36 | -O37 | 1.49(3) | O47 | -O50 | 1.467(19) |

Table S15 - Bond Angles (Degrees)  
For U36a

|       |     |        |          |       |     |        |          |
|-------|-----|--------|----------|-------|-----|--------|----------|
| O14   | -U1 | -O15   | 91.8(7)  | O3    | -U2 | -O11   | 71.4(5)  |
| O14   | -U1 | -O20   | 89.5(3)  | O3    | -U2 | -O24   | 90.2(6)  |
| O14   | -U1 | -O34   | 87.1(6)  | O3    | -U2 | -O38   | 88.8(6)  |
| O14   | -U1 | -O41   | 178.9(8) | O3    | -U2 | -O40   | 108.6(5) |
| O14   | -U1 | -O15_g | 91.8(7)  | O3    | -U2 | -O3_h  | 67.9(5)  |
| O14   | -U1 | -O20_i | 89.5(3)  | O3    | -U2 | -O11_h | 139.3(5) |
| O14   | -U1 | -O34_i | 87.1(6)  | O3    | -U2 | -O40_h | 176.3(5) |
| O15   | -U1 | -O20   | 73.2(5)  | O11   | -U2 | -O24   | 90.3(4)  |
| O15   | -U1 | -O34   | 109.3(5) | O11   | -U2 | -O38   | 90.0(4)  |
| O15   | -U1 | -O41   | 87.3(6)  | O11   | -U2 | -O40   | 37.3(5)  |
| O15   | -U1 | -O15_g | 68.4(6)  | O3_h  | -U2 | -O11   | 139.3(5) |
| O15   | -U1 | -O20_i | 141.6(5) | O11   | -U2 | -O11_h | 149.4(5) |
| O15   | -U1 | -O34_i | 177.5(5) | O11   | -U2 | -O40_h | 112.1(5) |
| O20   | -U1 | -O34   | 36.2(5)  | O24   | -U2 | -O38   | 178.8(8) |
| O20   | -U1 | -O41   | 90.8(3)  | O24   | -U2 | -O40   | 91.1(6)  |
| O15_g | -U1 | -O20   | 141.6(5) | O3_h  | -U2 | -O24   | 90.2(6)  |
| O20   | -U1 | -O20_i | 145.3(5) | O11_h | -U2 | -O24   | 90.3(4)  |
| O20   | -U1 | -O34_i | 109.1(5) | O24   | -U2 | -O40_h | 91.1(6)  |
| O34   | -U1 | -O41   | 93.8(5)  | O38   | -U2 | -O40   | 89.9(6)  |
| O15_g | -U1 | -O34   | 177.5(5) | O3_h  | -U2 | -O38   | 88.8(6)  |
| O20_i | -U1 | -O34   | 109.1(5) | O11_h | -U2 | -O38   | 90.0(4)  |
| O34   | -U1 | -O34_i | 73.0(5)  | O38   | -U2 | -O40_h | 89.9(6)  |
| O15_g | -U1 | -O41   | 87.3(6)  | O3_h  | -U2 | -O40   | 176.3(5) |
| O20_i | -U1 | -O41   | 90.8(3)  | O11_h | -U2 | -O40   | 112.1(5) |
| O34_i | -U1 | -O41   | 93.8(5)  | O40   | -U2 | -O40_h | 74.8(5)  |
| O15_g | -U1 | -O20_i | 73.2(5)  | O3_h  | -U2 | -O11_h | 71.4(5)  |
| O15_g | -U1 | -O34_i | 109.3(5) | O3_h  | -U2 | -O40_h | 108.6(5) |
| O20_i | -U1 | -O34_i | 36.2(5)  | O11_h | -U2 | -O40_h | 37.3(5)  |

Table S15 - Bond Angles (Degrees) (continued)  
For U36a

|       |     |        |          |     |     |      |          |
|-------|-----|--------|----------|-----|-----|------|----------|
| O2    | -U3 | -O19   | 178.2(8) | O5  | -U4 | -O9  | 107.7(5) |
| O2    | -U3 | -O33   | 90.7(7)  | O5  | -U4 | -O18 | 67.6(5)  |
| O2    | -U3 | -O47   | 87.1(6)  | O5  | -U4 | -O23 | 88.8(5)  |
| O2    | -U3 | -O50   | 88.9(4)  | O5  | -U4 | -O26 | 141.1(5) |
| O2    | -U3 | -O33_g | 90.7(7)  | O5  | -U4 | -O31 | 70.4(5)  |
| O2    | -U3 | -O47_h | 87.1(6)  | O5  | -U4 | -O45 | 90.3(5)  |
| O2    | -U3 | -O50_h | 88.9(4)  | O5  | -U4 | -O54 | 177.2(5) |
| O19   | -U3 | -O33   | 87.8(6)  | O9  | -U4 | -O18 | 174.3(4) |
| O19   | -U3 | -O47   | 94.4(6)  | O9  | -U4 | -O23 | 91.0(5)  |
| O19   | -U3 | -O50   | 91.7(4)  | O9  | -U4 | -O26 | 111.2(5) |
| O19   | -U3 | -O33_g | 87.8(6)  | O9  | -U4 | -O31 | 37.3(5)  |
| O19   | -U3 | -O47_h | 94.4(6)  | O9  | -U4 | -O45 | 88.6(5)  |
| O19   | -U3 | -O50_h | 91.7(4)  | O9  | -U4 | -O54 | 74.1(5)  |
| O33   | -U3 | -O47   | 110.4(5) | O18 | -U4 | -O23 | 92.0(5)  |
| O33   | -U3 | -O50   | 74.5(5)  | O18 | -U4 | -O26 | 73.6(5)  |
| O33   | -U3 | -O33_g | 67.5(6)  | O18 | -U4 | -O31 | 137.8(5) |
| O33   | -U3 | -O47_h | 176.9(6) | O18 | -U4 | -O45 | 88.4(5)  |
| O33   | -U3 | -O50_h | 141.9(5) | O18 | -U4 | -O54 | 110.8(5) |
| O47   | -U3 | -O50   | 36.0(5)  | O23 | -U4 | -O26 | 90.5(6)  |
| O33_g | -U3 | -O47   | 176.9(6) | O23 | -U4 | -O31 | 90.0(5)  |
| O47   | -U3 | -O47_h | 71.6(5)  | O23 | -U4 | -O45 | 178.8(5) |
| O47   | -U3 | -O50_h | 107.6(5) | O23 | -U4 | -O54 | 89.0(6)  |
| O33_g | -U3 | -O50   | 141.9(5) | O26 | -U4 | -O31 | 148.5(5) |
| O47_h | -U3 | -O50   | 107.6(5) | O26 | -U4 | -O45 | 90.8(6)  |
| O50   | -U3 | -O50_h | 143.6(4) | O26 | -U4 | -O54 | 37.2(6)  |
| O33_g | -U3 | -O47_h | 110.4(5) | O31 | -U4 | -O45 | 88.9(5)  |
| O33_g | -U3 | -O50_h | 74.5(5)  | O31 | -U4 | -O54 | 111.4(5) |
| O47_h | -U3 | -O50_h | 36.0(5)  | O45 | -U4 | -O54 | 92.0(6)  |

Table S15 - Bond Angles (Degrees) (continued)  
For U36a

|     |     |      |          |     |     |      |          |
|-----|-----|------|----------|-----|-----|------|----------|
| O8  | -U5 | -O10 | 89.6(5)  | O6  | -U6 | -O7  | 179.0(6) |
| O8  | -U5 | -O11 | 93.5(5)  | O6  | -U6 | -O9  | 90.8(5)  |
| O8  | -U5 | -O21 | 89.1(5)  | O6  | -U6 | -O21 | 92.4(5)  |
| O8  | -U5 | -O22 | 87.8(5)  | O6  | -U6 | -O22 | 91.6(5)  |
| O8  | -U5 | -O25 | 179.9(8) | O6  | -U6 | -O31 | 86.8(5)  |
| O8  | -U5 | -O40 | 88.1(5)  | O6  | -U6 | -O39 | 86.3(5)  |
| O8  | -U5 | -O44 | 94.2(5)  | O6  | -U6 | -O46 | 90.7(5)  |
| O10 | -U5 | -O11 | 106.5(5) | O7  | -U6 | -O9  | 89.0(5)  |
| O10 | -U5 | -O21 | 178.0(4) | O7  | -U6 | -O21 | 86.7(5)  |
| O10 | -U5 | -O22 | 110.1(5) | O7  | -U6 | -O22 | 88.6(5)  |
| O10 | -U5 | -O25 | 90.5(5)  | O7  | -U6 | -O31 | 92.5(5)  |
| O10 | -U5 | -O40 | 70.1(5)  | O7  | -U6 | -O39 | 94.8(5)  |
| O10 | -U5 | -O44 | 37.4(5)  | O7  | -U6 | -O46 | 90.2(5)  |
| O11 | -U5 | -O21 | 75.1(5)  | O9  | -U6 | -O21 | 112.0(4) |
| O11 | -U5 | -O22 | 143.4(5) | O9  | -U6 | -O22 | 177.6(5) |
| O11 | -U5 | -O25 | 86.5(5)  | O9  | -U6 | -O31 | 37.5(4)  |
| O11 | -U5 | -O40 | 36.7(5)  | O9  | -U6 | -O39 | 107.5(4) |
| O11 | -U5 | -O44 | 142.9(5) | O9  | -U6 | -O46 | 70.6(5)  |
| O21 | -U5 | -O22 | 68.3(5)  | O21 | -U6 | -O22 | 68.0(4)  |
| O21 | -U5 | -O25 | 90.8(5)  | O21 | -U6 | -O31 | 75.0(4)  |
| O21 | -U5 | -O40 | 111.4(5) | O21 | -U6 | -O39 | 140.5(4) |
| O21 | -U5 | -O44 | 141.2(5) | O21 | -U6 | -O46 | 175.9(5) |
| O22 | -U5 | -O25 | 92.2(5)  | O22 | -U6 | -O31 | 142.8(5) |
| O22 | -U5 | -O40 | 176.0(5) | O22 | -U6 | -O39 | 72.6(4)  |
| O22 | -U5 | -O44 | 73.2(5)  | O22 | -U6 | -O46 | 109.3(5) |
| O25 | -U5 | -O40 | 91.8(5)  | O31 | -U6 | -O39 | 144.1(4) |
| O25 | -U5 | -O44 | 85.9(5)  | O31 | -U6 | -O46 | 107.9(5) |
| O40 | -U5 | -O44 | 107.4(5) | O39 | -U6 | -O46 | 37.1(5)  |

Table S15 - Bond Angles (Degrees) (continued)  
For U36a

|     |     |      |          |       |     |        |          |
|-----|-----|------|----------|-------|-----|--------|----------|
| 01  | -U7 | -04  | 67.6(4)  | 017   | -U8 | -027   | 88.3(6)  |
| 01  | -U7 | -017 | 111.1(4) | 017   | -U8 | -032   | 37.5(5)  |
| 01  | -U7 | -020 | 143.2(4) | 017   | -U8 | -042   | 94.1(5)  |
| 01  | -U7 | -032 | 73.8(4)  | 017   | -U8 | -053   | 109.4(5) |
| 01  | -U7 | -034 | 178.4(5) | 017   | -U8 | -017_i | 72.2(5)  |
| 01  | -U7 | -035 | 86.0(5)  | 017   | -U8 | -032_i | 109.6(5) |
| 01  | -U7 | -043 | 90.3(5)  | 017   | -U8 | -053_i | 178.4(5) |
| 04  | -U7 | -017 | 177.6(5) | 027   | -U8 | -032   | 91.1(4)  |
| 04  | -U7 | -020 | 75.6(5)  | 027   | -U8 | -042   | 177.0(8) |
| 04  | -U7 | -032 | 141.4(5) | 027   | -U8 | -053   | 91.4(6)  |
| 04  | -U7 | -034 | 112.1(5) | 017_i | -U8 | -027   | 88.3(6)  |
| 04  | -U7 | -035 | 85.8(5)  | 027   | -U8 | -032_i | 91.1(4)  |
| 04  | -U7 | -043 | 91.2(5)  | 027   | -U8 | -053_i | 91.4(6)  |
| 017 | -U7 | -020 | 105.6(5) | 032   | -U8 | -042   | 89.7(4)  |
| 017 | -U7 | -032 | 37.3(5)  | 032   | -U8 | -053   | 71.9(5)  |
| 017 | -U7 | -034 | 69.1(5)  | 017_i | -U8 | -032   | 109.6(5) |
| 017 | -U7 | -035 | 92.1(5)  | 032   | -U8 | -032_i | 146.9(5) |
| 017 | -U7 | -043 | 90.9(5)  | 032   | -U8 | -053_i | 141.0(5) |
| 020 | -U7 | -032 | 142.8(5) | 042   | -U8 | -053   | 86.2(5)  |
| 020 | -U7 | -034 | 36.5(5)  | 017_i | -U8 | -042   | 94.1(5)  |
| 020 | -U7 | -035 | 90.8(5)  | 032_i | -U8 | -042   | 89.7(4)  |
| 020 | -U7 | -043 | 91.2(5)  | 042   | -U8 | -053_i | 86.2(5)  |
| 032 | -U7 | -034 | 106.4(5) | 017_i | -U8 | -053   | 178.4(4) |
| 032 | -U7 | -035 | 89.3(5)  | 032_i | -U8 | -053   | 141.0(5) |
| 032 | -U7 | -043 | 91.3(5)  | 053   | -U8 | -053_i | 69.1(5)  |
| 034 | -U7 | -035 | 92.5(5)  | 017_i | -U8 | -032_i | 37.5(5)  |
| 034 | -U7 | -043 | 91.3(5)  | 017_i | -U8 | -053_i | 109.4(5) |
| 035 | -U7 | -043 | 175.9(6) | 032_i | -U8 | -053_i | 71.9(5)  |

Table S15 - Bond Angles (Degrees) (continued)  
For U36a

|     |     |      |          |       |      |        |          |
|-----|-----|------|----------|-------|------|--------|----------|
| O1  | -U9 | -O4  | 68.6(4)  | O29   | -U10 | -O39   | 90.7(4)  |
| O1  | -U9 | -O10 | 106.9(4) | O29   | -U10 | -O46   | 87.1(6)  |
| O1  | -U9 | -O12 | 90.1(5)  | O29   | -U10 | -O49   | 177.7(9) |
| O1  | -U9 | -O28 | 89.0(5)  | O29   | -U10 | -O53   | 89.3(6)  |
| O1  | -U9 | -O36 | 142.3(5) | O29   | -U10 | -O39_i | 90.7(4)  |
| O1  | -U9 | -O37 | 178.4(4) | O29   | -U10 | -O46_i | 87.1(6)  |
| O1  | -U9 | -O44 | 69.6(4)  | O29   | -U10 | -O53_i | 89.3(6)  |
| O4  | -U9 | -O10 | 175.2(5) | O39   | -U10 | -O46   | 37.0(4)  |
| O4  | -U9 | -O12 | 92.6(5)  | O39   | -U10 | -O49   | 88.7(4)  |
| O4  | -U9 | -O28 | 88.4(5)  | O39   | -U10 | -O53   | 70.3(4)  |
| O4  | -U9 | -O36 | 73.7(5)  | O39   | -U10 | -O39_i | 150.6(4) |
| O4  | -U9 | -O37 | 110.0(5) | O39   | -U10 | -O46_i | 113.7(4) |
| O4  | -U9 | -O44 | 138.2(5) | O39   | -U10 | -O53_i | 139.1(4) |
| O10 | -U9 | -O12 | 88.9(5)  | O46   | -U10 | -O49   | 91.1(6)  |
| O10 | -U9 | -O28 | 90.1(5)  | O46   | -U10 | -O53   | 107.1(5) |
| O10 | -U9 | -O36 | 110.8(5) | O39_i | -U10 | -O46   | 113.7(4) |
| O10 | -U9 | -O37 | 74.6(5)  | O46   | -U10 | -O46_i | 76.7(5)  |
| O10 | -U9 | -O44 | 37.4(5)  | O46   | -U10 | -O53_i | 174.6(5) |
| O12 | -U9 | -O28 | 178.4(6) | O49   | -U10 | -O53   | 92.6(6)  |
| O12 | -U9 | -O36 | 90.7(6)  | O39_i | -U10 | -O49   | 88.7(4)  |
| O12 | -U9 | -O37 | 89.4(6)  | O46_i | -U10 | -O49   | 91.1(6)  |
| O12 | -U9 | -O44 | 86.9(5)  | O49   | -U10 | -O53_i | 92.6(6)  |
| O28 | -U9 | -O36 | 90.9(6)  | O39_i | -U10 | -O53   | 139.1(4) |
| O28 | -U9 | -O37 | 91.6(6)  | O46_i | -U10 | -O53   | 174.6(5) |
| O28 | -U9 | -O44 | 91.5(6)  | O53   | -U10 | -O53_i | 68.8(5)  |
| O36 | -U9 | -O37 | 36.3(6)  | O39_i | -U10 | -O46_i | 37.0(4)  |
| O36 | -U9 | -O44 | 148.1(5) | O39_i | -U10 | -O53_i | 70.3(4)  |
| O37 | -U9 | -O44 | 111.8(5) | O46_i | -U10 | -O53_i | 107.1(5) |



Table S15 - Bond Angles (Degrees) (continued)  
For U36a

|     |      |      |          |       |      |        |          |
|-----|------|------|----------|-------|------|--------|----------|
| O5  | -U11 | -O13 | 111.3(5) | O3    | -U12 | -O13   | 110.2(5) |
| O5  | -U11 | -O16 | 86.8(5)  | O3    | -U12 | -O30   | 86.5(6)  |
| O5  | -U11 | -O18 | 69.2(4)  | O3    | -U12 | -O51   | 73.7(5)  |
| O5  | -U11 | -O47 | 177.8(5) | O3    | -U12 | -O52   | 91.9(7)  |
| O5  | -U11 | -O48 | 91.8(5)  | O3    | -U12 | -O3_h  | 68.5(5)  |
| O5  | -U11 | -O50 | 144.1(5) | O3    | -U12 | -O13_h | 178.5(5) |
| O5  | -U11 | -O51 | 74.3(5)  | O3    | -U12 | -O51_h | 142.1(5) |
| O13 | -U11 | -O16 | 90.9(5)  | O13   | -U12 | -O30   | 92.7(6)  |
| O13 | -U11 | -O18 | 177.4(5) | O13   | -U12 | -O51   | 36.5(5)  |
| O13 | -U11 | -O47 | 68.4(5)  | O13   | -U12 | -O52   | 88.8(7)  |
| O13 | -U11 | -O48 | 90.9(5)  | O3_h  | -U12 | -O13   | 178.5(5) |
| O13 | -U11 | -O50 | 104.5(5) | O13   | -U12 | -O13_h | 71.2(5)  |
| O13 | -U11 | -O51 | 37.1(5)  | O13   | -U12 | -O51_h | 107.6(5) |
| O16 | -U11 | -O18 | 86.6(5)  | O30   | -U12 | -O51   | 89.3(4)  |
| O16 | -U11 | -O47 | 91.0(5)  | O30   | -U12 | -O52   | 178.2(9) |
| O16 | -U11 | -O48 | 178.1(6) | O3_h  | -U12 | -O30   | 86.5(6)  |
| O16 | -U11 | -O50 | 91.0(5)  | O13_h | -U12 | -O30   | 92.7(6)  |
| O16 | -U11 | -O51 | 89.9(5)  | O30   | -U12 | -O51_h | 89.3(4)  |
| O18 | -U11 | -O47 | 110.9(4) | O51   | -U12 | -O52   | 91.2(4)  |
| O18 | -U11 | -O48 | 91.7(5)  | O3_h  | -U12 | -O51   | 142.1(5) |
| O18 | -U11 | -O50 | 74.9(4)  | O13_h | -U12 | -O51   | 107.6(5) |
| O18 | -U11 | -O51 | 143.4(4) | O51   | -U12 | -O51_h | 144.0(5) |
| O47 | -U11 | -O48 | 90.4(5)  | O3_h  | -U12 | -O52   | 91.9(7)  |
| O47 | -U11 | -O50 | 36.1(5)  | O13_h | -U12 | -O52   | 88.8(7)  |
| O47 | -U11 | -O51 | 105.6(5) | O51_h | -U12 | -O52   | 91.2(4)  |
| O48 | -U11 | -O50 | 89.4(5)  | O3_h  | -U12 | -O13_h | 110.2(5) |
| O48 | -U11 | -O51 | 90.9(5)  | O3_h  | -U12 | -O51_h | 73.7(5)  |
| O50 | -U11 | -O51 | 141.7(5) | O13_h | -U12 | -O51_h | 36.5(5)  |

Table S15 - Bond Angles (Degrees) (continued)  
For U36a

|       |      |        |           |      |      |       |          |
|-------|------|--------|-----------|------|------|-------|----------|
| O58_a | -I1  | -O60   | 101.6(10) | U9   | -O10 | -O44  | 70.4(7)  |
| I1_a  | -I1  | -O58_a | 45.5(5)   | U5   | -O10 | -U9   | 137.2(6) |
| I1_a  | -I1  | -O56   | 113.6(5)  | U2   | -O11 | -O40  | 73.2(8)  |
| O56   | -I1  | -O58_a | 105.9(7)  | U5   | -O11 | -O40  | 72.4(7)  |
| O58   | -I1  | -O60   | 101.6(10) | U2   | -O11 | -U5   | 130.4(6) |
| I1_a  | -I1  | -O58   | 45.5(4)   | U12  | -O13 | -O51  | 74.2(8)  |
| O58   | -I1  | -O58_a | 91.1(6)   | U11  | -O13 | -U12  | 124.5(6) |
| O56   | -I1  | -O58   | 105.9(7)  | U11  | -O13 | -O51  | 73.6(7)  |
| O56   | -I1  | -O60   | 140.4(13) | U1   | -O15 | -U1_g | 109.8(8) |
| I1_a  | -I1  | -O60   | 106.0(12) | U7   | -O17 | -U8   | 123.7(6) |
| I2_d  | -I2  | -O57   | 43.3(5)   | U8   | -O17 | -O32  | 72.9(7)  |
| O55   | -I2  | -O57   | 105.1(7)  | U7   | -O17 | -O32  | 74.5(7)  |
| I2_d  | -I2  | -O55   | 111.1(5)  | U4   | -O18 | -U11  | 107.6(5) |
| O55   | -I2  | -O57_d | 105.1(7)  | U1   | -O20 | -U7   | 117.8(5) |
| O55   | -I2  | -O59   | 144.1(11) | U7   | -O20 | -O34  | 68.6(7)  |
| O57   | -I2  | -O59   | 100.8(10) | U1   | -O20 | -O34  | 70.1(7)  |
| O57_d | -I2  | -O59   | 100.8(10) | U5   | -O21 | -U6   | 109.1(5) |
| O57   | -I2  | -O57_d | 86.7(7)   | U5   | -O22 | -U6   | 110.2(5) |
| I2_d  | -I2  | -O59   | 104.8(10) | U4   | -O26 | -O54  | 71.7(5)  |
| I2_d  | -I2  | -O57_d | 43.3(5)   | U4   | -O26 | -U4_i | 130.4(8) |
| U7    | -O1  | -U9    | 109.5(4)  | U4_i | -O26 | -O54  | 71.7(5)  |
| U2    | -O3  | -U12   | 110.9(6)  | U4   | -O31 | -O9   | 73.8(7)  |
| U7    | -O4  | -U9    | 107.8(5)  | U6   | -O31 | -O9   | 70.2(7)  |
| U4    | -O5  | -U11   | 110.2(5)  | U4   | -O31 | -U6   | 135.0(6) |
| U6    | -O9  | -O31   | 72.3(7)   | U8   | -O32 | -O17  | 69.6(7)  |
| U4    | -O9  | -O31   | 68.8(7)   | U7   | -O32 | -U8   | 117.9(6) |
| U4    | -O9  | -U6    | 132.6(6)  | U7   | -O32 | -O17  | 68.2(7)  |
| U5    | -O10 | -O44   | 72.0(7)   | U3   | -O33 | -U3_g | 110.1(8) |

Table S15 - Bond Angles (Degrees) (continued)  
For U36a

|      |      |       |          |      |      |       |          |
|------|------|-------|----------|------|------|-------|----------|
| U7   | -O34 | -O20  | 74.9(7)  | U6   | -O46 | -O39  | 71.9(7)  |
| U1   | -O34 | -O20  | 73.8(8)  | U6   | -O46 | -U10  | 128.2(6) |
| U1   | -O34 | -U7   | 123.5(6) | U10  | -O46 | -O39  | 68.7(7)  |
| U9   | -O36 | -O37  | 72.3(5)  | U3   | -O47 | -O50  | 74.8(8)  |
| U9   | -O36 | -U9_h | 130.6(8) | U11  | -O47 | -O50  | 74.1(8)  |
| U9_h | -O36 | -O37  | 72.3(5)  | U3   | -O47 | -U11  | 123.4(6) |
| U9_h | -O37 | -O36  | 71.4(5)  | U3   | -O50 | -O47  | 69.2(7)  |
| U9   | -O37 | -O36  | 71.4(5)  | U11  | -O50 | -O47  | 69.8(7)  |
| U9   | -O37 | -U9_h | 129.4(8) | U3   | -O50 | -U11  | 117.7(6) |
| U6   | -O39 | -O46  | 71.0(7)  | U12  | -O51 | -O13  | 69.2(7)  |
| U10  | -O39 | -O46  | 74.3(7)  | U11  | -O51 | -U12  | 119.0(6) |
| U6   | -O39 | -U10  | 131.7(6) | U11  | -O51 | -O13  | 69.3(7)  |
| U2   | -O40 | -U5   | 126.9(6) | U8   | -O53 | -U10  | 110.0(5) |
| U2   | -O40 | -O11  | 69.6(7)  | U4_i | -O54 | -O26  | 71.1(5)  |
| U5   | -O40 | -O11  | 70.9(7)  | U4   | -O54 | -U4_i | 129.6(8) |
| U9   | -O44 | -O10  | 72.2(7)  | U4   | -O54 | -O26  | 71.1(5)  |
| U5   | -O44 | -O10  | 70.6(7)  | I1   | -O58 | -I1_a | 88.9(9)  |
| U5   | -O44 | -U9   | 137.6(6) | I2   | -O57 | -I2_d | 93.4(9)  |

Table S16 - Crystal Data and Details of the Structure Determination  
For U44a

| Crystal Data                        |                               |           |           |
|-------------------------------------|-------------------------------|-----------|-----------|
| Formula                             | O110 U22, 21(O), 4(Na), 3(Li) |           |           |
| Formula Weight                      | 7445.44                       |           |           |
| Crystal System                      | Triclinic                     |           |           |
| Space group                         | P-1                           | (No. 2)   |           |
| a, b, c [Angstrom]                  | 19.5335(19)                   | 19.852(2) | 28.963(3) |
| alpha, beta, gamma [deg]            | 89.418(2)                     | 71.838(2) | 61.544(2) |
| V [Ang**3]                          | 9252.8(16)                    |           |           |
| Z                                   | 2                             |           |           |
| D(calc) [g/cm**3]                   | 2.672                         |           |           |
| Mu(MoKa) [ /mm ]                    | 19.266                        |           |           |
| F(000)                              | 6250                          |           |           |
| Crystal Size [mm]                   | 0.01 x 0.01 x 0.06            |           |           |
| Data Collection                     |                               |           |           |
| Temperature (K)                     | 120                           |           |           |
| Radiation [Angstrom]                | MoKa                          | 0.71073   |           |
| Theta Min-Max [Deg]                 | 1.6, 25.1                     |           |           |
| Dataset                             | -23: 23 ; -23: 23 ; -34: 34   |           |           |
| Tot., Uniq. Data, R(int)            | 103442,                       | 32934,    | 0.138     |
| Observed data [I > 2.0 sigma(I)]    | 11622                         |           |           |
| Refinement                          |                               |           |           |
| Nref, Npar                          | 32934, 751                    |           |           |
| R, wR2, S                           | 0.0468, 0.1025, 0.61          |           |           |
| w = 1/[\s^2^(Fo^2^)+(0.0000P)^2^]   | where P=(Fo^2^+2Fc^2^)/3      |           |           |
| Max. and Av. Shift/Error            | 0.00, 0.00                    |           |           |
| Min. and Max. Resd. Dens. [e/Ang^3] | -1.40, 2.86                   |           |           |

Table S17 - Final Coordinates and Equivalent Isotropic Displacement Parameters of the non-Hydrogen atoms For U44a

| Atom | x           | y          | z           | U(eq) [Ang <sup>2</sup> ] |
|------|-------------|------------|-------------|---------------------------|
| ---- | ---         | ---        | ---         | -----                     |
| U1   | 0.73851(6)  | 0.83065(5) | 0.17225(3)  | 0.0243(4)                 |
| U2   | 1.21396(7)  | 1.01209(5) | 0.12898(3)  | 0.0259(4)                 |
| U3   | 0.12002(6)  | 1.39703(5) | 0.11155(3)  | 0.0267(4)                 |
| U4   | 1.28372(7)  | 0.89848(5) | -0.01144(3) | 0.0269(4)                 |
| U5   | 0.33684(6)  | 1.32788(5) | 0.01093(3)  | 0.0248(3)                 |
| U6   | 1.19898(6)  | 1.00664(5) | -0.11130(4) | 0.0260(4)                 |
| U7   | 0.33898(7)  | 0.88197(5) | 0.22324(3)  | 0.0265(4)                 |
| U8   | 0.59285(6)  | 0.78504(5) | 0.12973(3)  | 0.0247(4)                 |
| U9   | 0.65932(6)  | 0.94926(5) | 0.31244(3)  | 0.0261(4)                 |
| U10  | 0.52287(7)  | 1.33793(5) | 0.05164(3)  | 0.0264(4)                 |
| U11  | 1.05869(6)  | 1.23335(5) | 0.17253(4)  | 0.0288(4)                 |
| U12  | 0.72330(6)  | 1.11086(5) | 0.25189(4)  | 0.0279(4)                 |
| U13  | 0.46254(7)  | 1.44501(5) | 0.18259(3)  | 0.0270(4)                 |
| U14  | -0.00537(6) | 1.34187(5) | 0.31347(4)  | 0.0292(4)                 |
| U15  | 0.56255(7)  | 1.32994(5) | 0.28625(4)  | 0.0291(4)                 |
| U16  | 0.27145(6)  | 0.98414(5) | 0.35697(4)  | 0.0273(4)                 |
| U17  | 0.05934(7)  | 1.50412(5) | 0.25270(4)  | 0.0288(4)                 |
| U18  | 0.22348(7)  | 1.53039(5) | 0.28594(4)  | 0.0294(4)                 |
| U19  | 0.43662(6)  | 1.02019(5) | 0.40187(3)  | 0.0266(4)                 |
| U20  | 0.09581(7)  | 1.22029(5) | 0.40288(3)  | 0.0286(4)                 |
| U21  | 0.32453(7)  | 1.40728(5) | 0.38736(3)  | 0.0291(4)                 |
| U22  | 0.26410(6)  | 1.25689(5) | 0.44359(3)  | 0.0285(4)                 |
| O1   | 1.2331(9)   | 0.8898(8)  | -0.0760(5)  | 0.027(4)                  |
| O2   | 0.2139(10)  | 1.3160(9)  | 0.0346(6)   | 0.039(5)                  |
| O3   | 1.2124(9)   | 1.0283(8)  | -0.0352(5)  | 0.028(4)                  |
| O4   | 0.6410(10)  | 0.7871(8)  | 0.1955(6)   | 0.037(5)                  |

Table S17 - Final Coordinates and Equivalent Isotropic Displacement Parameters of the non-Hydrogen atoms (continued)  
For U44a

| Atom | x          | y         | z          | U(eq) [Ang <sup>2</sup> ] |
|------|------------|-----------|------------|---------------------------|
| ---- | ---        | ---       | ---        | -----                     |
| O5   | 0.3754(9)  | 0.8770(8) | 0.2959(5)  | 0.023(4)                  |
| O6   | 1.1687(9)  | 1.1184(8) | -0.1473(5) | 0.027(4)                  |
| O7   | 0.2297(9)  | 0.9623(8) | 0.2939(5)  | 0.027(4)                  |
| O8   | 0.5620(10) | 0.7746(9) | 0.0585(6)  | 0.043(5)                  |
| O9   | 0.7628(9)  | 0.8617(8) | 0.2421(5)  | 0.022(4)                  |
| O10  | 0.5713(9)  | 1.3606(8) | 0.1118(5)  | 0.024(4)                  |
| O11  | 0.2230(9)  | 1.4323(8) | 0.0745(5)  | 0.029(4)                  |
| O12  | 0.3499(10) | 1.5281(9) | 0.2502(6)  | 0.037(5)                  |
| O13  | 0.5557(9)  | 1.0354(8) | 0.3816(5)  | 0.023(4)                  |
| O14  | 0.5565(10) | 0.9157(8) | 0.3477(6)  | 0.033(4)                  |
| O15  | 0.3227(10) | 1.0012(8) | 0.4183(6)  | 0.031(4)                  |
| O16  | 0.7188(9)  | 0.7926(8) | 0.1016(5)  | 0.028(4)                  |
| O17  | 1.1471(9)  | 1.1329(8) | 0.1022(5)  | 0.026(4)                  |
| O18  | 1.1025(9)  | 1.1071(8) | 0.1935(6)  | 0.032(4)                  |
| O19  | 0.4596(9)  | 0.7948(8) | 0.1551(5)  | 0.027(4)                  |
| O20  | 0.8187(9)  | 1.0148(8) | 0.1852(5)  | 0.030(4)                  |
| O21  | 0.4208(9)  | 1.4468(8) | 0.1137(5)  | 0.028(4)                  |
| O22  | 0.5038(9)  | 1.4420(8) | 0.2508(5)  | 0.025(4)                  |
| O23  | 0.4657(10) | 1.3273(8) | -0.0069(6) | 0.031(4)                  |
| O24  | 0.7586(10) | 0.9875(8) | 0.2776(6)  | 0.034(4)                  |
| O25  | 1.3177(10) | 0.9234(9) | 0.0571(6)  | 0.044(5)                  |
| O26  | 0.0229(9)  | 1.4822(8) | 0.1844(5)  | 0.024(4)                  |
| O27  | 0.0200(9)  | 1.3507(8) | 0.3878(5)  | 0.030(4)                  |
| O28  | 0.1627(9)  | 1.0932(8) | 0.4189(5)  | 0.026(4)                  |
| O29  | 0.3658(9)  | 1.2975(8) | 0.4289(5)  | 0.030(4)                  |
| O30  | 0.5583(9)  | 1.4013(8) | 0.0147(5)  | 0.028(4)                  |

Table S17 - Final Coordinates and Equivalent Isotropic Displacement Parameters of the non-Hydrogen atoms (continued)  
For U44a

| Atom | x          | y         | z          | U(eq) [Ang <sup>2</sup> ] |
|------|------------|-----------|------------|---------------------------|
| ---- | ---        | ---       | ---        | -----                     |
| O31  | 1.3777(8)  | 0.8866(7) | -0.0541(5) | 0.016(4)                  |
| O32  | 0.0241(9)  | 1.2263(8) | 0.3478(5)  | 0.028(4)                  |
| O33  | 0.6880(9)  | 1.2348(8) | 0.2259(5)  | 0.032(4)                  |
| O34  | 0.0964(10) | 1.5313(9) | 0.3211(6)  | 0.043(5)                  |
| O35  | 0.3059(9)  | 1.0431(8) | 0.3196(5)  | 0.023(4)                  |
| O36  | 0.1007(9)  | 1.3006(7) | 0.2795(5)  | 0.018(4)                  |
| O37  | 0.0239(10) | 1.3580(8) | 0.1487(6)  | 0.035(5)                  |
| O38  | 0.6966(9)  | 1.0466(8) | 0.3217(5)  | 0.024(4)                  |
| O39  | 0.4615(9)  | 0.9705(8) | 0.4520(5)  | 0.023(4)                  |
| O40  | 0.0093(8)  | 1.2388(7) | 0.4511(5)  | 0.011(3)                  |
| O41  | 0.1907(8)  | 1.3358(7) | 0.1406(5)  | 0.014(4)                  |
| O42  | 0.9657(10) | 1.3300(9) | 0.2425(6)  | 0.043(5)                  |
| O43  | 0.6239(10) | 1.2117(8) | 0.3205(6)  | 0.035(5)                  |
| O44  | 0.2917(10) | 0.8948(8) | 0.1558(6)  | 0.034(5)                  |
| O45  | 1.3387(9)  | 0.7618(8) | -0.0312(5) | 0.026(4)                  |
| O46  | 1.2852(9)  | 1.0433(8) | 0.1361(5)  | 0.024(4)                  |
| O47  | 0.1576(9)  | 1.5479(8) | 0.2273(6)  | 0.032(4)                  |
| O48  | 1.1835(9)  | 1.1354(8) | -0.1031(5) | 0.023(4)                  |
| O49  | 0.5415(8)  | 0.8886(7) | 0.1349(5)  | 0.014(4)                  |
| O50  | 0.8259(9)  | 0.7335(8) | 0.1611(5)  | 0.029(4)                  |
| O51  | 0.2234(9)  | 0.9473(8) | 0.1977(5)  | 0.023(4)                  |
| O52  | 0.3152(9)  | 0.8054(8) | 0.2395(5)  | 0.030(4)                  |
| O53  | 0.5791(9)  | 1.3849(8) | 0.2114(5)  | 0.027(4)                  |
| O54  | 0.4394(9)  | 1.3689(7) | 0.1978(5)  | 0.019(4)                  |
| O55  | 0.0843(9)  | 1.5092(8) | 0.1649(5)  | 0.026(4)                  |
| O56  | 0.6510(9)  | 0.9246(8) | 0.1813(5)  | 0.022(4)                  |

Table S17 - Final Coordinates and Equivalent Isotropic Displacement Parameters of the non-Hydrogen atoms (continued)  
For U44a

| Atom | x           | y         | z          | U(eq) [Ang <sup>2</sup> ] |
|------|-------------|-----------|------------|---------------------------|
| ---- | ---         | ---       | ---        | -----                     |
| O57  | 0.3923(10)  | 0.9321(8) | 0.3802(6)  | 0.032(4)                  |
| O58  | 0.6385(9)   | 1.1151(8) | 0.2379(5)  | 0.023(4)                  |
| O59  | 0.7031(10)  | 0.8350(8) | 0.2604(5)  | 0.032(4)                  |
| O60  | 1.0941(9)   | 1.0428(8) | -0.0781(5) | 0.026(4)                  |
| O61  | 0.7191(9)   | 0.8920(8) | 0.3494(5)  | 0.031(4)                  |
| O62  | 0.3998(9)   | 1.3966(8) | 0.0326(5)  | 0.030(4)                  |
| O63  | 0.4163(9)   | 1.0653(8) | 0.3513(5)  | 0.029(4)                  |
| O64  | 1.1545(9)   | 1.2209(8) | 0.1791(5)  | 0.031(4)                  |
| O65  | 0.3186(10)  | 1.5361(9) | 0.2124(6)  | 0.038(5)                  |
| O66  | 0.1681(9)   | 1.6341(8) | 0.3045(5)  | 0.026(4)                  |
| O67  | 0.0520(9)   | 1.4611(8) | 0.0792(5)  | 0.027(4)                  |
| O68  | 0.6469(9)   | 0.6846(8) | 0.1248(6)  | 0.033(4)                  |
| O69  | 0.9725(9)   | 1.2361(8) | 0.1612(5)  | 0.030(4)                  |
| O70  | 0.4909(9)   | 1.5181(8) | 0.1645(5)  | 0.024(4)                  |
| O71  | 0.3683(9)   | 1.2635(8) | 0.0530(5)  | 0.023(4)                  |
| O72  | -0.0133(10) | 1.4687(9) | 0.3229(6)  | 0.045(5)                  |
| O73  | 0.1828(8)   | 1.2014(7) | 0.3512(5)  | 0.018(4)                  |
| O74  | 0.1247(9)   | 1.2983(8) | 0.4485(5)  | 0.029(4)                  |
| O75  | 0.2749(9)   | 1.4308(8) | 0.2670(5)  | 0.023(4)                  |
| O76  | 0.3648(9)   | 0.9595(8) | 0.2056(5)  | 0.028(4)                  |
| O77  | 0.9834(10)  | 1.2576(9) | 0.2605(6)  | 0.036(5)                  |
| O78  | 0.4825(9)   | 0.7915(8) | 0.1990(6)  | 0.031(4)                  |
| O79  | 0.8030(10)  | 1.0847(9) | 0.1667(6)  | 0.041(5)                  |
| O80  | 0.5978(9)   | 1.0052(8) | 0.2775(5)  | 0.023(4)                  |
| O81  | 1.1904(8)   | 0.9084(7) | 0.0300(5)  | 0.014(4)                  |
| O82  | 0.3028(9)   | 1.3959(7) | -0.0299(5) | 0.021(4)                  |



Table S17 - Final Coordinates and Equivalent Isotropic Displacement Parameters of the non-Hydrogen atoms (continued)  
For U44a

| Atom | x          | y         | z          | U(eq) [Ang <sup>2</sup> ] |
|------|------------|-----------|------------|---------------------------|
| ---- | ---        | ---       | ---        | -----                     |
| O83  | 0.1483(9)  | 1.4082(8) | 0.2367(5)  | 0.024(4)                  |
| O84  | 0.6413(9)  | 0.7742(8) | 0.0417(5)  | 0.030(4)                  |
| O85  | 0.3434(8)  | 1.3440(7) | 0.3371(5)  | 0.010(3)                  |
| O86  | 0.4370(10) | 1.4252(8) | 0.3476(6)  | 0.034(4)                  |
| O87  | -0.0261(9) | 1.6032(8) | 0.2682(5)  | 0.032(4)                  |
| O88  | 0.3007(9)  | 1.2251(8) | 0.3788(5)  | 0.029(4)                  |
| O89  | 0.6193(10) | 1.3673(9) | 0.3046(6)  | 0.039(5)                  |
| O90  | 0.4876(9)  | 1.2797(8) | 0.0880(5)  | 0.024(4)                  |
| O91  | 1.1407(9)  | 0.9846(8) | 0.1229(5)  | 0.027(4)                  |
| O92  | 1.3052(8)  | 0.9680(7) | -0.1412(5) | 0.017(4)                  |
| O93  | 0.2298(10) | 1.2937(9) | 0.5057(6)  | 0.040(5)                  |
| O94  | 0.3050(9)  | 1.4646(8) | 0.4399(5)  | 0.028(4)                  |
| O95  | 0.2095(10) | 1.3902(8) | 0.4317(6)  | 0.036(5)                  |
| O96  | 0.4645(10) | 1.3562(9) | 0.3682(6)  | 0.041(5)                  |
| O97  | 0.3184(10) | 1.1274(8) | 0.4583(6)  | 0.034(4)                  |
| O98  | 0.2131(11) | 1.5073(9) | 0.3695(6)  | 0.046(5)                  |
| O99  | 0.3832(10) | 1.1476(8) | 0.4499(5)  | 0.032(4)                  |
| O100 | 0.0832(10) | 1.3008(8) | 0.1027(6)  | 0.036(5)                  |
| O101 | 0.1297(10) | 1.0875(8) | 0.3825(6)  | 0.036(5)                  |
| O102 | 0.2420(10) | 0.9218(8) | 0.3913(6)  | 0.036(5)                  |
| O103 | 0.2837(9)  | 1.5178(8) | 0.3476(5)  | 0.025(4)                  |
| O104 | 1.3704(10) | 0.7728(9) | 0.0078(6)  | 0.042(5)                  |
| O105 | 0.5089(9)  | 1.2909(8) | 0.2655(5)  | 0.026(4)                  |
| O106 | 0.1631(10) | 1.2206(8) | 0.4606(6)  | 0.035(4)                  |
| O107 | -0.1110(9) | 1.3804(8) | 0.3514(5)  | 0.030(4)                  |
| O108 | 1.2739(10) | 0.9970(9) | 0.0433(6)  | 0.037(5)                  |

Table S17 - Final Coordinates and Equivalent Isotropic Displacement  
Parameters of the non-Hydrogen atoms (continued)  
For U44a

| Atom | x           | y          | z          | U(eq) [Ang <sup>2</sup> ] |
|------|-------------|------------|------------|---------------------------|
| ---- | ---         | ---        | ---        | -----                     |
| O109 | -0.0383(10) | 1.4608(9)  | 0.2833(6)  | 0.039(5)                  |
| O110 | 0.8060(10)  | 1.1113(9)  | 0.2676(6)  | 0.041(5)                  |
| O111 | 0.3403(13)  | 1.3009(11) | 0.1703(8)  | 0.085(7)                  |
| O112 | 0.2522(15)  | 1.2975(13) | 0.2876(9)  | 0.112(9)                  |
| O113 | 0.4570(14)  | 1.1715(12) | 0.2893(8)  | 0.100(8)                  |
| O114 | 0.2672(14)  | 1.1348(12) | 0.2366(8)  | 0.100(8)                  |
| O115 | 0.4616(15)  | 1.0264(13) | 0.2296(9)  | 0.108(9)                  |
| O116 | 0.5158(17)  | 1.1766(15) | 0.1685(10) | 0.141(11)                 |
| O117 | 0.4746(9)   | 0.6677(8)  | 0.1083(5)  | 0.025(4)                  |
| O118 | 1.2945(9)   | 0.7703(8)  | 0.1042(5)  | 0.032(4)                  |
| O119 | 0.3000(10)  | 1.6784(9)  | 0.1920(6)  | 0.040(5)                  |
| O120 | 0.2497(11)  | 0.9661(10) | 0.5072(6)  | 0.057(6)                  |
| O121 | 0.3849(9)   | 1.5864(8)  | 0.0827(5)  | 0.032(4)                  |
| O122 | 1.4527(15)  | 0.9180(13) | 0.0606(9)  | 0.114(9)                  |

Table S17 - Final Coordinates and Equivalent Isotropic Displacement  
Parameters of the non-Hydrogen atoms (continued)  
For U44a

| Atom | x          | y          | z          | U(eq) [Ang <sup>2</sup> ] |
|------|------------|------------|------------|---------------------------|
| ---- | ---        | ---        | ---        | -----                     |
| O123 | 0.2324(13) | 1.1200(11) | 0.5547(8)  | 0.085(7)                  |
| O124 | 0.3799(14) | 0.9569(12) | 0.5502(8)  | 0.105(8)                  |
| O125 | 0.7778(14) | 1.0317(12) | 0.3809(8)  | 0.105(8)                  |
| O126 | 0.4217(16) | 1.0653(14) | 0.1446(9)  | 0.127(10)                 |
| O127 | 1.3628(11) | 0.7729(10) | -0.1492(7) | 0.056(6)                  |
| O128 | 0.5024(15) | 0.9091(13) | 0.2707(9)  | 0.101(8)                  |
| O129 | 0.2786(13) | 1.4441(11) | 0.1477(7)  | 0.074(7)                  |
| O130 | 0.5021(14) | 1.1812(12) | 0.3571(8)  | 0.089(7)                  |
| O131 | 0.1544(19) | 1.1089(16) | 0.2690(11) | 0.157(12)                 |
| Na1  | 0.2258(7)  | 1.2702(6)  | 0.2095(4)  | 0.057(3)                  |
| Na2  | 0.3316(7)  | 1.1489(6)  | 0.2998(4)  | 0.063(4)                  |
| Na3  | 0.5644(10) | 1.0643(8)  | 0.2087(6)  | 0.115(6)                  |
| Na4  | 0.3890(11) | 1.2873(10) | 0.2467(7)  | 0.140(7)                  |

Table S17 - Final Coordinates and Equivalent Isotropic Displacement  
Parameters of the non-Hydrogen atoms (continued)  
For U44a

| Atom | x        | y        | z          | U(eq) [Ang^2] |
|------|----------|----------|------------|---------------|
| ---- | ---      | ---      | ---        | -----         |
| Li1  | 0.361(3) | 1.673(3) | 0.1219(17) | 0.046(13)     |
| Li2  | 0.260(3) | 1.012(3) | 0.5638(18) | 0.058(15)     |
| Li3  | 0.407(3) | 0.985(3) | 0.132(2)   | 0.070(17)     |

U(eq) = 1/3 of the trace of the orthogonalized U Tensor

Table S18 - (An)isotropic Displacement Parameters  
For U44a

| Atom | U(1,1) or U | U(2,2)    | U(3,3)    | U(2,3)    | U(1,3)     | U(1,2)     |
|------|-------------|-----------|-----------|-----------|------------|------------|
| U1   | 0.0355(7)   | 0.0220(6) | 0.0198(6) | 0.0036(4) | -0.0130(5) | -0.0155(5) |
| U2   | 0.0405(7)   | 0.0227(6) | 0.0200(6) | 0.0051(5) | -0.0148(5) | -0.0173(5) |
| U3   | 0.0384(7)   | 0.0212(6) | 0.0224(6) | 0.0058(5) | -0.0179(6) | -0.0119(5) |
| U4   | 0.0465(8)   | 0.0226(6) | 0.0196(6) | 0.0065(5) | -0.0153(6) | -0.0210(6) |
| U5   | 0.0424(7)   | 0.0195(5) | 0.0178(6) | 0.0047(4) | -0.0141(5) | -0.0172(5) |
| U6   | 0.0378(7)   | 0.0242(6) | 0.0214(6) | 0.0063(5) | -0.0135(5) | -0.0177(5) |
| U7   | 0.0442(7)   | 0.0226(6) | 0.0201(6) | 0.0065(5) | -0.0156(5) | -0.0197(6) |
| U8   | 0.0401(7)   | 0.0212(6) | 0.0202(6) | 0.0045(4) | -0.0148(5) | -0.0183(5) |
| U9   | 0.0371(7)   | 0.0228(6) | 0.0203(6) | 0.0061(5) | -0.0174(5) | -0.0120(5) |
| U10  | 0.0481(8)   | 0.0204(5) | 0.0219(6) | 0.0069(5) | -0.0186(6) | -0.0216(6) |
| U11  | 0.0388(8)   | 0.0247(6) | 0.0252(6) | 0.0051(5) | -0.0179(6) | -0.0135(6) |
| U12  | 0.0386(7)   | 0.0271(6) | 0.0256(6) | 0.0052(5) | -0.0199(6) | -0.0169(6) |
| U13  | 0.0478(8)   | 0.0212(6) | 0.0230(6) | 0.0078(5) | -0.0199(6) | -0.0209(6) |
| U14  | 0.0337(7)   | 0.0256(6) | 0.0224(6) | 0.0026(5) | -0.0128(5) | -0.0086(5) |
| U15  | 0.0448(8)   | 0.0245(6) | 0.0273(6) | 0.0062(5) | -0.0223(6) | -0.0184(6) |
| U16  | 0.0398(7)   | 0.0240(6) | 0.0209(6) | 0.0065(5) | -0.0154(5) | -0.0151(5) |
| U17  | 0.0425(8)   | 0.0205(6) | 0.0216(6) | 0.0039(5) | -0.0174(6) | -0.0107(5) |
| U18  | 0.0474(8)   | 0.0187(5) | 0.0243(6) | 0.0064(5) | -0.0206(6) | -0.0133(5) |
| U19  | 0.0391(7)   | 0.0241(6) | 0.0174(6) | 0.0065(5) | -0.0161(5) | -0.0126(5) |
| U20  | 0.0379(7)   | 0.0264(6) | 0.0197(6) | 0.0053(5) | -0.0132(5) | -0.0129(5) |
| U21  | 0.0463(8)   | 0.0228(6) | 0.0206(6) | 0.0044(5) | -0.0187(6) | -0.0147(5) |
| U22  | 0.0417(7)   | 0.0237(6) | 0.0179(6) | 0.0042(4) | -0.0159(5) | -0.0114(5) |

=====

The Temperature Factor has the Form of  $\text{Exp}(-T)$  Where  
 $T = 8 * (\text{Pi}^{**2}) * U * (\text{Sin}(\text{Theta}) / \text{Lambda})^{**2}$  for Isotropic Atoms  
 $T = 2 * (\text{Pi}^{**2}) * \text{Sum}_{ij} (h(i) * h(j) * U(i,j) * \text{Astar}(i) * \text{Astar}(j))$ , for  
Anisotropic Atoms. Astar(i) are Reciprocal Axial Lengths and  
h(i) are the Reflection Indices.

Table S19 - Bond Distances (Angstrom)  
For U44a

|    |        |           |    |        |           |
|----|--------|-----------|----|--------|-----------|
| U1 | -O4    | 2.36(2)   | U4 | -O45   | 2.391(14) |
| U1 | -O9    | 2.367(16) | U4 | -O81   | 1.761(16) |
| U1 | -O16   | 2.389(16) | U4 | -O104  | 2.437(17) |
| U1 | -O50   | 1.808(15) | U4 | -O108  | 2.427(18) |
| U1 | -O56   | 1.778(15) | U5 | -O2    | 2.41(2)   |
| U1 | -O59   | 2.419(14) | U5 | -O11   | 2.401(14) |
| U1 | -O6_d  | 2.397(18) | U5 | -O23   | 2.40(2)   |
| U1 | -O48_d | 2.416(16) | U5 | -O62   | 2.422(18) |
| U2 | -O17   | 2.381(14) | U5 | -O71   | 1.784(14) |
| U2 | -O18   | 2.326(16) | U5 | -O82   | 1.807(13) |
| U2 | -O25   | 2.363(17) | U5 | -O8_c  | 2.421(16) |
| U2 | -O46   | 1.835(19) | U5 | -O84_c | 2.333(15) |
| U2 | -O91   | 1.811(19) | U6 | -O1    | 2.403(14) |
| U2 | -O108  | 2.343(16) | U6 | -O3    | 2.366(15) |
| U2 | -O44_b | 2.379(15) | U6 | -O6    | 2.334(14) |
| U2 | -O51_b | 2.367(14) | U6 | -O48   | 2.432(15) |
| U3 | -O2    | 2.373(16) | U6 | -O60   | 1.738(18) |
| U3 | -O11   | 2.381(18) | U6 | -O92   | 1.738(16) |
| U3 | -O26   | 2.330(14) | U6 | -O20_d | 2.345(15) |
| U3 | -O37   | 2.32(2)   | U6 | -O79_d | 2.455(18) |
| U3 | -O41   | 1.788(15) | U7 | -O5    | 2.410(16) |
| U3 | -O55   | 2.398(15) | U7 | -O7    | 2.321(14) |
| U3 | -O67   | 1.845(16) | U7 | -O19   | 2.393(15) |
| U3 | -O100  | 2.381(18) | U7 | -O44   | 2.371(18) |
| U4 | -O1    | 2.414(17) | U7 | -O51   | 2.358(18) |
| U4 | -O3    | 2.489(14) | U7 | -O52   | 1.808(16) |
| U4 | -O25   | 2.404(19) | U7 | -O76   | 1.857(16) |
| U4 | -O31   | 1.770(16) | U7 | -O78   | 2.362(18) |

Table S19 - Bond Distances (Angstrom) (continued)  
For U44a

|     |         |           |     |         |           |
|-----|---------|-----------|-----|---------|-----------|
| U8  | -O4     | 2.381(19) | U11 | -O69    | 1.79(2)   |
| U8  | -O8     | 2.359(18) | U11 | -O77    | 2.429(17) |
| U8  | -O16    | 2.416(19) | U11 | -O37_b  | 2.391(15) |
| U8  | -O19    | 2.384(19) | U11 | -O100_b | 2.463(16) |
| U8  | -O49    | 1.790(12) | U12 | -O20    | 2.299(14) |
| U8  | -O68    | 1.737(14) | U12 | -O24    | 2.388(15) |
| U8  | -O78    | 2.395(18) | U12 | -O33    | 2.401(14) |
| U8  | -O84    | 2.399(14) | U12 | -O38    | 2.431(14) |
| U9  | -O9     | 2.327(14) | U12 | -O43    | 2.387(16) |
| U9  | -O13    | 2.297(14) | U12 | -O58    | 1.789(19) |
| U9  | -O14    | 2.35(2)   | U12 | -O79    | 2.375(17) |
| U9  | -O24    | 2.35(2)   | U12 | -O110   | 1.81(2)   |
| U9  | -O38    | 2.410(17) | U13 | -O10    | 2.342(14) |
| U9  | -O59    | 2.359(15) | U13 | -O12    | 2.306(17) |
| U9  | -O61    | 1.814(16) | U13 | -O21    | 2.373(16) |
| U9  | -O80    | 1.779(16) | U13 | -O22    | 2.345(16) |
| U10 | -O10    | 2.363(17) | U13 | -O53    | 2.425(18) |
| U10 | -O21    | 2.370(14) | U13 | -O54    | 1.787(15) |
| U10 | -O23    | 2.362(19) | U13 | -O65    | 2.365(19) |
| U10 | -O30    | 1.883(16) | U13 | -O70    | 1.805(16) |
| U10 | -O62    | 2.363(18) | U14 | -O27    | 2.380(16) |
| U10 | -O90    | 1.789(16) | U14 | -O32    | 2.374(14) |
| U10 | -O45_d  | 2.347(17) | U14 | -O36    | 1.749(17) |
| U10 | -O104_d | 2.370(16) | U14 | -O72    | 2.461(17) |
| U11 | -O17    | 2.391(14) | U14 | -O107   | 1.775(17) |
| U11 | -O18    | 2.373(14) | U14 | -O109   | 2.369(16) |
| U11 | -O42    | 2.356(16) | U14 | -O42_a  | 2.337(18) |
| U11 | -O64    | 1.84(2)   | U14 | -O77_a  | 2.411(19) |

Table S19 - Bond Distances (Angstrom) (continued)  
For U44a

|     |       |           |     |       |           |
|-----|-------|-----------|-----|-------|-----------|
| U15 | -O22  | 2.361(14) | U18 | -O66  | 1.799(14) |
| U15 | -O33  | 2.369(15) | U18 | -O75  | 1.733(14) |
| U15 | -O43  | 2.438(15) | U18 | -O98  | 2.423(16) |
| U15 | -O53  | 2.418(14) | U18 | -O103 | 2.378(17) |
| U15 | -O86  | 2.383(17) | U19 | -O13  | 2.379(19) |
| U15 | -O89  | 1.79(2)   | U19 | -O14  | 2.323(16) |
| U15 | -O96  | 2.411(17) | U19 | -O15  | 2.34(2)   |
| U15 | -O105 | 1.799(19) | U19 | -O39  | 1.809(14) |
| U16 | -O5   | 2.345(14) | U19 | -O57  | 2.451(19) |
| U16 | -O7   | 2.339(17) | U19 | -O63  | 1.761(14) |
| U16 | -O15  | 2.391(19) | U19 | -O97  | 2.360(16) |
| U16 | -O28  | 2.395(14) | U19 | -O99  | 2.464(15) |
| U16 | -O35  | 1.807(16) | U20 | -O27  | 2.411(14) |
| U16 | -O57  | 2.40(2)   | U20 | -O28  | 2.345(14) |
| U16 | -O101 | 2.401(18) | U20 | -O32  | 2.398(17) |
| U16 | -O102 | 1.774(17) | U20 | -O40  | 1.700(15) |
| U17 | -O26  | 2.408(16) | U20 | -O73  | 1.757(15) |
| U17 | -O34  | 2.455(19) | U20 | -O74  | 2.409(17) |
| U17 | -O47  | 2.383(19) | U20 | -O101 | 2.421(15) |
| U17 | -O55  | 2.446(14) | U20 | -O106 | 2.43(2)   |
| U17 | -O72  | 2.401(18) | U21 | -O29  | 2.393(14) |
| U17 | -O83  | 1.795(15) | U21 | -O85  | 1.759(14) |
| U17 | -O87  | 1.811(15) | U21 | -O86  | 2.33(2)   |
| U17 | -O109 | 2.38(2)   | U21 | -O94  | 1.737(15) |
| U18 | -O12  | 2.34(2)   | U21 | -O95  | 2.39(2)   |
| U18 | -O34  | 2.36(2)   | U21 | -O96  | 2.29(2)   |
| U18 | -O47  | 2.363(18) | U21 | -O98  | 2.347(19) |
| U18 | -O65  | 2.394(18) | U21 | -O103 | 2.373(14) |



Table S19 - Bond Distances (Angstrom) (continued)  
For U44a

|     |       |           |     |       |         |
|-----|-------|-----------|-----|-------|---------|
| U22 | -029  | 2.402(19) | O22 | -053  | 1.46(2) |
| U22 | -074  | 2.396(19) | O23 | -062  | 1.51(2) |
| U22 | -088  | 1.786(14) | O24 | -038  | 1.48(2) |
| U22 | -093  | 1.740(16) | O25 | -0108 | 1.43(2) |
| U22 | -095  | 2.404(14) | O26 | -055  | 1.49(3) |
| U22 | -097  | 2.361(14) | O28 | -0101 | 1.43(3) |
| U22 | -099  | 2.366(17) | O37 | -0100 | 1.49(2) |
| U22 | -0106 | 2.32(2)   | O42 | -077  | 1.44(2) |
| O6  | -048  | 1.47(2)   | O44 | -051  | 1.43(2) |
| O8  | -084  | 1.47(3)   | O45 | -0104 | 1.51(3) |
| O9  | -059  | 1.46(3)   | O72 | -0109 | 1.42(3) |
| O12 | -065  | 1.39(3)   | O74 | -0106 | 1.45(2) |
| O15 | -057  | 1.51(2)   | O86 | -096  | 1.42(2) |
| O19 | -078  | 1.47(2)   | O97 | -099  | 1.45(3) |
| O20 | -079  | 1.41(2)   | O98 | -0103 | 1.44(3) |

Table S20 - Bond Angles (Degrees)  
For U44a

|       |     |        |          |       |     |        |          |
|-------|-----|--------|----------|-------|-----|--------|----------|
| O4    | -U1 | -O9    | 110.3(6) | O17   | -U2 | -O18   | 68.3(5)  |
| O4    | -U1 | -O16   | 69.3(6)  | O17   | -U2 | -O25   | 105.7(5) |
| O4    | -U1 | -O50   | 92.9(7)  | O17   | -U2 | -O46   | 86.2(6)  |
| O4    | -U1 | -O56   | 85.5(7)  | O17   | -U2 | -O91   | 92.4(7)  |
| O4    | -U1 | -O59   | 74.9(6)  | O17   | -U2 | -O108  | 70.4(5)  |
| O4    | -U1 | -O6_d  | 176.5(5) | O17   | -U2 | -O44_b | 173.9(7) |
| O4    | -U1 | -O48_d | 142.7(6) | O17   | -U2 | -O51_b | 145.7(5) |
| O9    | -U1 | -O16   | 177.1(5) | O18   | -U2 | -O25   | 172.9(6) |
| O9    | -U1 | -O50   | 89.7(6)  | O18   | -U2 | -O46   | 92.4(7)  |
| O9    | -U1 | -O56   | 92.9(6)  | O18   | -U2 | -O91   | 85.8(7)  |
| O9    | -U1 | -O59   | 35.4(6)  | O18   | -U2 | -O108  | 138.4(6) |
| O6_d  | -U1 | -O9    | 71.1(5)  | O18   | -U2 | -O44_b | 112.7(5) |
| O9    | -U1 | -O48_d | 106.8(6) | O18   | -U2 | -O51_b | 77.8(5)  |
| O16   | -U1 | -O50   | 87.5(6)  | O25   | -U2 | -O46   | 90.8(7)  |
| O16   | -U1 | -O56   | 90.0(6)  | O25   | -U2 | -O91   | 90.9(7)  |
| O16   | -U1 | -O59   | 144.0(6) | O25   | -U2 | -O108  | 35.3(6)  |
| O6_d  | -U1 | -O16   | 109.4(5) | O25   | -U2 | -O44_b | 73.7(6)  |
| O16   | -U1 | -O48_d | 73.9(6)  | O25   | -U2 | -O51_b | 108.5(5) |
| O50   | -U1 | -O56   | 177.3(7) | O46   | -U2 | -O91   | 178.0(7) |
| O50   | -U1 | -O59   | 91.2(6)  | O46   | -U2 | -O108  | 89.2(7)  |
| O6_d  | -U1 | -O50   | 90.3(7)  | O44_b | -U2 | -O46   | 87.8(7)  |
| O48_d | -U1 | -O50   | 91.1(6)  | O46   | -U2 | -O51_b | 90.6(6)  |
| O56   | -U1 | -O59   | 90.5(6)  | O91   | -U2 | -O108  | 91.6(7)  |
| O6_d  | -U1 | -O56   | 91.2(7)  | O44_b | -U2 | -O91   | 93.7(7)  |
| O48_d | -U1 | -O56   | 88.8(6)  | O51_b | -U2 | -O91   | 89.9(6)  |
| O6_d  | -U1 | -O59   | 106.5(6) | O44_b | -U2 | -O108  | 108.9(6) |
| O48_d | -U1 | -O59   | 142.1(6) | O51_b | -U2 | -O108  | 143.8(5) |
| O6_d  | -U1 | -O48_d | 35.6(5)  | O44_b | -U2 | -O51_b | 34.9(5)  |

Table S20 - Bond Angles (Degrees) (continued)  
For U44a

|     |     |       |          |      |     |       |          |
|-----|-----|-------|----------|------|-----|-------|----------|
| O2  | -U3 | -O11  | 69.1(6)  | O1   | -U4 | -O3   | 69.6(5)  |
| O2  | -U3 | -O26  | 176.3(5) | O1   | -U4 | -O25  | 172.5(5) |
| O2  | -U3 | -O37  | 110.3(6) | O1   | -U4 | -O31  | 92.5(6)  |
| O2  | -U3 | -O41  | 89.6(6)  | O1   | -U4 | -O45  | 77.3(5)  |
| O2  | -U3 | -O55  | 142.8(6) | O1   | -U4 | -O81  | 86.4(6)  |
| O2  | -U3 | -O67  | 88.6(6)  | O1   | -U4 | -O104 | 113.7(6) |
| O2  | -U3 | -O100 | 73.5(6)  | O1   | -U4 | -O108 | 139.2(5) |
| O11 | -U3 | -O26  | 110.6(6) | O3   | -U4 | -O25  | 104.4(5) |
| O11 | -U3 | -O37  | 177.5(6) | O3   | -U4 | -O31  | 87.3(6)  |
| O11 | -U3 | -O41  | 84.6(6)  | O3   | -U4 | -O45  | 146.3(5) |
| O11 | -U3 | -O55  | 73.9(5)  | O3   | -U4 | -O81  | 93.3(6)  |
| O11 | -U3 | -O67  | 92.2(7)  | O3   | -U4 | -O104 | 172.3(7) |
| O11 | -U3 | -O100 | 142.3(5) | O3   | -U4 | -O108 | 70.0(5)  |
| O26 | -U3 | -O37  | 70.1(6)  | O25  | -U4 | -O31  | 91.7(7)  |
| O26 | -U3 | -O41  | 94.0(6)  | O25  | -U4 | -O45  | 109.1(5) |
| O26 | -U3 | -O55  | 36.8(6)  | O25  | -U4 | -O81  | 89.6(7)  |
| O26 | -U3 | -O67  | 87.8(6)  | O25  | -U4 | -O104 | 72.9(6)  |
| O26 | -U3 | -O100 | 107.0(6) | O25  | -U4 | -O108 | 34.4(6)  |
| O37 | -U3 | -O41  | 93.0(7)  | O31  | -U4 | -O45  | 88.4(6)  |
| O37 | -U3 | -O55  | 106.8(6) | O31  | -U4 | -O81  | 178.5(6) |
| O37 | -U3 | -O67  | 90.3(7)  | O31  | -U4 | -O104 | 85.6(6)  |
| O37 | -U3 | -O100 | 36.9(6)  | O31  | -U4 | -O108 | 91.2(7)  |
| O41 | -U3 | -O55  | 90.3(6)  | O45  | -U4 | -O81  | 90.4(6)  |
| O41 | -U3 | -O67  | 176.6(7) | O45  | -U4 | -O104 | 36.4(6)  |
| O41 | -U3 | -O100 | 90.5(6)  | O45  | -U4 | -O108 | 143.5(6) |
| O55 | -U3 | -O67  | 89.5(6)  | O81  | -U4 | -O104 | 94.0(6)  |
| O55 | -U3 | -O100 | 143.7(6) | O81  | -U4 | -O108 | 90.3(7)  |
| O67 | -U3 | -O100 | 91.7(7)  | O104 | -U4 | -O108 | 107.1(6) |

Table S20 - Bond Angles (Degrees) (continued)  
For U44a

|      |     |        |          |       |     |        |          |
|------|-----|--------|----------|-------|-----|--------|----------|
| O2   | -U5 | -O11   | 68.2(6)  | O1    | -U6 | -O3    | 71.8(5)  |
| O2   | -U5 | -O23   | 173.0(5) | O1    | -U6 | -O6    | 178.6(6) |
| O2   | -U5 | -O62   | 144.4(5) | O1    | -U6 | -O48   | 144.7(5) |
| O2   | -U5 | -O71   | 86.5(7)  | O1    | -U6 | -O60   | 90.3(6)  |
| O2   | -U5 | -O82   | 93.3(7)  | O1    | -U6 | -O92   | 86.8(6)  |
| O2   | -U5 | -O8_c  | 106.1(6) | O1    | -U6 | -O20_d | 107.5(5) |
| O2   | -U5 | -O84_c | 70.2(6)  | O1    | -U6 | -O79_d | 73.5(5)  |
| O11  | -U5 | -O23   | 113.3(6) | O3    | -U6 | -O6    | 108.9(5) |
| O11  | -U5 | -O62   | 76.8(6)  | O3    | -U6 | -O48   | 73.1(5)  |
| O11  | -U5 | -O71   | 94.0(6)  | O3    | -U6 | -O60   | 86.5(7)  |
| O11  | -U5 | -O82   | 84.0(6)  | O3    | -U6 | -O92   | 90.4(7)  |
| O8_c | -U5 | -O11   | 172.2(7) | O3    | -U6 | -O20_d | 178.0(6) |
| O11  | -U5 | -O84_c | 137.9(7) | O3    | -U6 | -O79_d | 145.1(5) |
| O23  | -U5 | -O62   | 36.5(5)  | O6    | -U6 | -O48   | 35.9(5)  |
| O23  | -U5 | -O71   | 86.5(7)  | O6    | -U6 | -O60   | 90.9(6)  |
| O23  | -U5 | -O82   | 93.7(7)  | O6    | -U6 | -O92   | 92.0(6)  |
| O8_c | -U5 | -O23   | 73.0(6)  | O6    | -U6 | -O20_d | 71.8(5)  |
| O23  | -U5 | -O84_c | 108.8(6) | O6    | -U6 | -O79_d | 105.9(5) |
| O62  | -U5 | -O71   | 89.7(7)  | O48   | -U6 | -O60   | 91.8(6)  |
| O62  | -U5 | -O82   | 89.3(7)  | O48   | -U6 | -O92   | 89.3(6)  |
| O8_c | -U5 | -O62   | 109.3(6) | O20_d | -U6 | -O48   | 107.7(5) |
| O62  | -U5 | -O84_c | 145.2(6) | O48   | -U6 | -O79_d | 141.7(5) |
| O71  | -U5 | -O82   | 178.0(6) | O60   | -U6 | -O92   | 176.3(7) |
| O8_c | -U5 | -O71   | 90.9(6)  | O20_d | -U6 | -O60   | 91.6(7)  |
| O71  | -U5 | -O84_c | 89.9(6)  | O60   | -U6 | -O79_d | 90.3(7)  |
| O8_c | -U5 | -O82   | 91.1(6)  | O20_d | -U6 | -O92   | 91.4(7)  |
| O82  | -U5 | -O84_c | 91.9(6)  | O79_d | -U6 | -O92   | 91.0(7)  |
| O8_c | -U5 | -O84_c | 35.9(7)  | O20_d | -U6 | -O79_d | 34.1(5)  |

Table S20 - Bond Angles (Degrees) (continued)  
For U44a

|     |     |      |          |     |     |      |          |
|-----|-----|------|----------|-----|-----|------|----------|
| 05  | -U7 | -07  | 65.1(6)  | 04  | -U8 | -08  | 173.2(7) |
| 05  | -U7 | -019 | 109.6(6) | 04  | -U8 | -016 | 68.5(6)  |
| 05  | -U7 | -044 | 175.2(6) | 04  | -U8 | -019 | 114.2(6) |
| 05  | -U7 | -051 | 140.2(5) | 04  | -U8 | -049 | 92.5(6)  |
| 05  | -U7 | -052 | 88.9(6)  | 04  | -U8 | -068 | 85.7(7)  |
| 05  | -U7 | -076 | 91.5(6)  | 04  | -U8 | -078 | 78.6(6)  |
| 05  | -U7 | -078 | 73.7(6)  | 04  | -U8 | -084 | 138.0(7) |
| 07  | -U7 | -019 | 174.6(6) | 08  | -U8 | -016 | 105.8(6) |
| 07  | -U7 | -044 | 110.2(6) | 08  | -U8 | -019 | 71.9(6)  |
| 07  | -U7 | -051 | 75.1(5)  | 08  | -U8 | -049 | 90.7(6)  |
| 07  | -U7 | -052 | 88.8(6)  | 08  | -U8 | -068 | 91.0(7)  |
| 07  | -U7 | -076 | 92.2(6)  | 08  | -U8 | -078 | 107.4(7) |
| 07  | -U7 | -078 | 138.8(6) | 08  | -U8 | -084 | 35.9(7)  |
| 019 | -U7 | -044 | 75.2(6)  | 016 | -U8 | -019 | 172.3(5) |
| 019 | -U7 | -051 | 110.3(5) | 016 | -U8 | -049 | 84.6(6)  |
| 019 | -U7 | -052 | 90.8(6)  | 016 | -U8 | -068 | 92.9(7)  |
| 019 | -U7 | -076 | 88.2(6)  | 016 | -U8 | -078 | 146.7(6) |
| 019 | -U7 | -078 | 35.9(6)  | 016 | -U8 | -084 | 69.9(6)  |
| 044 | -U7 | -051 | 35.1(5)  | 019 | -U8 | -049 | 88.1(7)  |
| 044 | -U7 | -052 | 91.2(7)  | 019 | -U8 | -068 | 94.5(7)  |
| 044 | -U7 | -076 | 88.5(7)  | 019 | -U8 | -078 | 35.7(6)  |
| 044 | -U7 | -078 | 111.1(6) | 019 | -U8 | -084 | 107.8(6) |
| 051 | -U7 | -052 | 91.7(7)  | 049 | -U8 | -068 | 177.2(9) |
| 051 | -U7 | -076 | 88.5(7)  | 049 | -U8 | -078 | 91.8(6)  |
| 051 | -U7 | -078 | 146.1(5) | 049 | -U8 | -084 | 89.4(6)  |
| 052 | -U7 | -076 | 179.1(6) | 068 | -U8 | -078 | 89.9(7)  |
| 052 | -U7 | -078 | 90.3(7)  | 068 | -U8 | -084 | 90.6(6)  |
| 076 | -U7 | -078 | 89.0(7)  | 078 | -U8 | -084 | 143.3(7) |

Table S20 - Bond Angles (Degrees) (continued)  
For U44a

|     |     |      |          |       |      |         |          |
|-----|-----|------|----------|-------|------|---------|----------|
| O9  | -U9 | -O13 | 179.1(7) | O10   | -U10 | -O21    | 66.2(6)  |
| O9  | -U9 | -O14 | 112.0(6) | O10   | -U10 | -O23    | 174.9(5) |
| O9  | -U9 | -O24 | 69.5(6)  | O10   | -U10 | -O30    | 88.1(6)  |
| O9  | -U9 | -O38 | 105.7(6) | O10   | -U10 | -O62    | 138.0(5) |
| O9  | -U9 | -O59 | 36.2(6)  | O10   | -U10 | -O90    | 91.2(7)  |
| O9  | -U9 | -O61 | 89.6(6)  | O10   | -U10 | -O45_d  | 73.5(5)  |
| O9  | -U9 | -O80 | 91.6(6)  | O10   | -U10 | -O104_d | 110.7(6) |
| O13 | -U9 | -O14 | 67.3(6)  | O21   | -U10 | -O23    | 109.2(6) |
| O13 | -U9 | -O24 | 111.2(6) | O21   | -U10 | -O30    | 90.2(6)  |
| O13 | -U9 | -O38 | 75.1(6)  | O21   | -U10 | -O62    | 71.9(6)  |
| O13 | -U9 | -O59 | 143.1(7) | O21   | -U10 | -O90    | 88.4(6)  |
| O13 | -U9 | -O61 | 90.9(6)  | O21   | -U10 | -O45_d  | 139.6(6) |
| O13 | -U9 | -O80 | 87.9(6)  | O21   | -U10 | -O104_d | 176.9(7) |
| O14 | -U9 | -O24 | 178.0(5) | O23   | -U10 | -O30    | 89.7(7)  |
| O14 | -U9 | -O38 | 142.3(5) | O23   | -U10 | -O62    | 37.3(5)  |
| O14 | -U9 | -O59 | 75.8(6)  | O23   | -U10 | -O90    | 91.0(7)  |
| O14 | -U9 | -O61 | 91.3(7)  | O23   | -U10 | -O45_d  | 111.2(6) |
| O14 | -U9 | -O80 | 86.9(7)  | O23   | -U10 | -O104_d | 73.9(6)  |
| O24 | -U9 | -O38 | 36.2(5)  | O30   | -U10 | -O62    | 90.0(7)  |
| O24 | -U9 | -O59 | 105.7(6) | O30   | -U10 | -O90    | 178.6(6) |
| O24 | -U9 | -O61 | 90.1(7)  | O30   | -U10 | -O45_d  | 90.4(6)  |
| O24 | -U9 | -O80 | 91.8(7)  | O30   | -U10 | -O104_d | 90.3(6)  |
| O38 | -U9 | -O59 | 141.8(6) | O62   | -U10 | -O90    | 89.7(7)  |
| O38 | -U9 | -O61 | 90.3(7)  | O45_d | -U10 | -O62    | 148.5(5) |
| O38 | -U9 | -O80 | 90.9(7)  | O62   | -U10 | -O104_d | 111.2(6) |
| O59 | -U9 | -O61 | 90.4(6)  | O45_d | -U10 | -O90    | 90.5(7)  |
| O59 | -U9 | -O80 | 89.6(6)  | O90   | -U10 | -O104_d | 91.1(6)  |
| O61 | -U9 | -O80 | 178.1(8) | O45_d | -U10 | -O104_d | 37.3(6)  |

Table S20 - Bond Angles (Degrees) (continued)  
For U44a

|       |      |         |          |     |      |       |          |
|-------|------|---------|----------|-----|------|-------|----------|
| O17   | -U11 | -O18    | 67.3(5)  | O20 | -U12 | -O24  | 71.2(5)  |
| O17   | -U11 | -O42    | 176.6(7) | O20 | -U12 | -O33  | 108.7(5) |
| O17   | -U11 | -O64    | 86.5(6)  | O20 | -U12 | -O38  | 107.0(5) |
| O17   | -U11 | -O69    | 87.4(6)  | O20 | -U12 | -O43  | 179.3(5) |
| O17   | -U11 | -O77    | 143.2(5) | O20 | -U12 | -O58  | 91.6(7)  |
| O17   | -U11 | -O37_b  | 110.5(5) | O20 | -U12 | -O79  | 35.1(5)  |
| O17   | -U11 | -O100_b | 74.8(5)  | O20 | -U12 | -O110 | 90.9(7)  |
| O18   | -U11 | -O42    | 111.2(6) | O24 | -U12 | -O33  | 179.9(8) |
| O18   | -U11 | -O64    | 84.8(7)  | O24 | -U12 | -O38  | 35.7(5)  |
| O18   | -U11 | -O69    | 91.9(7)  | O24 | -U12 | -O43  | 109.4(5) |
| O18   | -U11 | -O77    | 76.2(5)  | O24 | -U12 | -O58  | 92.0(7)  |
| O18   | -U11 | -O37_b  | 176.3(7) | O24 | -U12 | -O79  | 106.3(6) |
| O18   | -U11 | -O100_b | 141.8(5) | O24 | -U12 | -O110 | 89.9(7)  |
| O42   | -U11 | -O64    | 96.5(7)  | O33 | -U12 | -O38  | 144.4(5) |
| O42   | -U11 | -O69    | 89.6(7)  | O33 | -U12 | -O43  | 70.7(5)  |
| O42   | -U11 | -O77    | 35.1(5)  | O33 | -U12 | -O58  | 88.0(7)  |
| O37_b | -U11 | -O42    | 71.2(6)  | O33 | -U12 | -O79  | 73.6(5)  |
| O42   | -U11 | -O100_b | 106.9(5) | O33 | -U12 | -O110 | 90.1(7)  |
| O64   | -U11 | -O69    | 173.8(6) | O38 | -U12 | -O43  | 73.7(5)  |
| O64   | -U11 | -O77    | 95.0(7)  | O38 | -U12 | -O58  | 90.6(6)  |
| O37_b | -U11 | -O64    | 92.1(7)  | O38 | -U12 | -O79  | 142.0(5) |
| O64   | -U11 | -O100_b | 87.8(7)  | O38 | -U12 | -O110 | 89.7(7)  |
| O69   | -U11 | -O77    | 89.3(7)  | O43 | -U12 | -O58  | 88.2(7)  |
| O37_b | -U11 | -O69    | 91.0(7)  | O43 | -U12 | -O79  | 144.3(5) |
| O69   | -U11 | -O100_b | 91.6(7)  | O43 | -U12 | -O110 | 89.3(7)  |
| O37_b | -U11 | -O77    | 106.2(5) | O58 | -U12 | -O79  | 91.0(7)  |
| O77   | -U11 | -O100_b | 141.9(5) | O58 | -U12 | -O110 | 177.3(7) |
| O37_b | -U11 | -O100_b | 35.7(5)  | O79 | -U12 | -O110 | 90.4(7)  |

Table S20 - Bond Angles (Degrees) (continued)  
For U44a

|     |      |      |          |       |      |        |          |
|-----|------|------|----------|-------|------|--------|----------|
| O10 | -U13 | -O12 | 176.5(7) | O27   | -U14 | -O32   | 69.0(5)  |
| O10 | -U13 | -O21 | 66.5(6)  | O27   | -U14 | -O36   | 90.5(7)  |
| O10 | -U13 | -O22 | 113.4(6) | O27   | -U14 | -O72   | 74.9(5)  |
| O10 | -U13 | -O53 | 77.7(5)  | O27   | -U14 | -O107  | 86.1(7)  |
| O10 | -U13 | -O54 | 88.6(6)  | O27   | -U14 | -O109  | 108.6(6) |
| O10 | -U13 | -O65 | 142.3(6) | O27   | -U14 | -O42_a | 177.0(6) |
| O10 | -U13 | -O70 | 88.3(6)  | O27   | -U14 | -O77_a | 142.3(5) |
| O12 | -U13 | -O21 | 110.3(6) | O32   | -U14 | -O36   | 88.8(6)  |
| O12 | -U13 | -O22 | 69.9(6)  | O32   | -U14 | -O72   | 143.8(6) |
| O12 | -U13 | -O53 | 105.5(6) | O32   | -U14 | -O107  | 87.9(6)  |
| O12 | -U13 | -O54 | 90.1(6)  | O32   | -U14 | -O109  | 177.1(5) |
| O12 | -U13 | -O65 | 34.5(6)  | O32   | -U14 | -O42_a | 108.7(6) |
| O12 | -U13 | -O70 | 93.0(6)  | O32   | -U14 | -O77_a | 73.3(5)  |
| O21 | -U13 | -O22 | 179.4(4) | O36   | -U14 | -O72   | 88.8(7)  |
| O21 | -U13 | -O53 | 144.2(5) | O36   | -U14 | -O107  | 175.9(7) |
| O21 | -U13 | -O54 | 87.1(6)  | O36   | -U14 | -O109  | 92.9(6)  |
| O21 | -U13 | -O65 | 75.8(6)  | O36   | -U14 | -O42_a | 91.4(7)  |
| O21 | -U13 | -O70 | 92.0(6)  | O36   | -U14 | -O77_a | 90.5(7)  |
| O22 | -U13 | -O53 | 35.7(5)  | O72   | -U14 | -O107  | 92.4(7)  |
| O22 | -U13 | -O54 | 92.3(6)  | O72   | -U14 | -O109  | 34.0(6)  |
| O22 | -U13 | -O65 | 104.3(6) | O42_a | -U14 | -O72   | 107.5(6) |
| O22 | -U13 | -O70 | 88.6(6)  | O72   | -U14 | -O77_a | 142.8(6) |
| O53 | -U13 | -O54 | 90.8(7)  | O107  | -U14 | -O109  | 90.3(7)  |
| O53 | -U13 | -O65 | 140.0(5) | O42_a | -U14 | -O107  | 91.9(7)  |
| O53 | -U13 | -O70 | 88.1(7)  | O77_a | -U14 | -O107  | 90.9(7)  |
| O54 | -U13 | -O65 | 89.5(7)  | O42_a | -U14 | -O109  | 73.7(6)  |
| O54 | -U13 | -O70 | 176.9(7) | O77_a | -U14 | -O109  | 109.0(6) |
| O65 | -U13 | -O70 | 93.2(7)  | O42_a | -U14 | -O77_a | 35.3(6)  |



Table S20 - Bond Angles (Degrees) (continued)  
For U44a

|     |      |       |          |      |      |       |          |
|-----|------|-------|----------|------|------|-------|----------|
| O22 | -U15 | -O33  | 108.4(5) | O5   | -U16 | -O7   | 65.8(6)  |
| O22 | -U15 | -O43  | 178.2(5) | O5   | -U16 | -O15  | 110.8(6) |
| O22 | -U15 | -O53  | 35.6(5)  | O5   | -U16 | -O28  | 178.6(7) |
| O22 | -U15 | -O86  | 72.1(5)  | O5   | -U16 | -O35  | 87.5(6)  |
| O22 | -U15 | -O89  | 89.2(7)  | O5   | -U16 | -O57  | 74.1(6)  |
| O22 | -U15 | -O96  | 106.1(5) | O5   | -U16 | -O101 | 144.1(6) |
| O22 | -U15 | -O105 | 90.6(6)  | O5   | -U16 | -O102 | 89.5(6)  |
| O33 | -U15 | -O43  | 70.3(5)  | O7   | -U16 | -O15  | 176.5(6) |
| O33 | -U15 | -O53  | 72.8(5)  | O7   | -U16 | -O28  | 112.9(6) |
| O33 | -U15 | -O86  | 179.4(6) | O7   | -U16 | -O35  | 87.3(7)  |
| O33 | -U15 | -O89  | 89.6(7)  | O7   | -U16 | -O57  | 140.0(5) |
| O33 | -U15 | -O96  | 145.2(5) | O7   | -U16 | -O101 | 78.3(6)  |
| O33 | -U15 | -O105 | 88.4(7)  | O7   | -U16 | -O102 | 91.6(7)  |
| O43 | -U15 | -O53  | 143.0(5) | O15  | -U16 | -O28  | 70.5(6)  |
| O43 | -U15 | -O86  | 109.2(5) | O15  | -U16 | -O35  | 91.8(7)  |
| O43 | -U15 | -O89  | 92.2(7)  | O15  | -U16 | -O57  | 36.7(5)  |
| O43 | -U15 | -O96  | 75.0(6)  | O15  | -U16 | -O101 | 105.1(6) |
| O43 | -U15 | -O105 | 88.0(7)  | O15  | -U16 | -O102 | 89.2(7)  |
| O53 | -U15 | -O86  | 107.7(5) | O28  | -U16 | -O35  | 93.1(6)  |
| O53 | -U15 | -O89  | 90.0(7)  | O28  | -U16 | -O57  | 107.2(6) |
| O53 | -U15 | -O96  | 141.5(6) | O28  | -U16 | -O101 | 34.6(6)  |
| O53 | -U15 | -O105 | 88.5(6)  | O28  | -U16 | -O102 | 89.9(6)  |
| O86 | -U15 | -O89  | 90.1(7)  | O35  | -U16 | -O57  | 90.0(7)  |
| O86 | -U15 | -O96  | 34.3(5)  | O35  | -U16 | -O101 | 91.0(7)  |
| O86 | -U15 | -O105 | 92.0(7)  | O35  | -U16 | -O102 | 176.9(7) |
| O89 | -U15 | -O96  | 94.7(7)  | O57  | -U16 | -O101 | 141.7(6) |
| O89 | -U15 | -O105 | 177.7(7) | O57  | -U16 | -O102 | 89.0(8)  |
| O96 | -U15 | -O105 | 87.6(7)  | O101 | -U16 | -O102 | 91.6(7)  |

Table S20 - Bond Angles (Degrees) (continued)  
For U44a

|     |      |       |          |     |      |       |          |
|-----|------|-------|----------|-----|------|-------|----------|
| O26 | -U17 | -O34  | 177.6(5) | O12 | -U18 | -O34  | 179.2(5) |
| O26 | -U17 | -O47  | 110.6(6) | O12 | -U18 | -O47  | 110.0(6) |
| O26 | -U17 | -O55  | 35.8(6)  | O12 | -U18 | -O65  | 34.0(6)  |
| O26 | -U17 | -O72  | 107.6(6) | O12 | -U18 | -O66  | 91.8(7)  |
| O26 | -U17 | -O83  | 91.8(6)  | O12 | -U18 | -O75  | 89.1(7)  |
| O26 | -U17 | -O87  | 89.9(6)  | O12 | -U18 | -O98  | 106.3(7) |
| O26 | -U17 | -O109 | 73.2(6)  | O12 | -U18 | -O103 | 71.7(6)  |
| O34 | -U17 | -O47  | 67.6(6)  | O34 | -U18 | -O47  | 69.5(6)  |
| O34 | -U17 | -O55  | 142.4(6) | O34 | -U18 | -O65  | 145.5(6) |
| O34 | -U17 | -O72  | 74.3(7)  | O34 | -U18 | -O66  | 88.8(7)  |
| O34 | -U17 | -O83  | 89.6(7)  | O34 | -U18 | -O75  | 90.3(7)  |
| O34 | -U17 | -O87  | 88.7(7)  | O34 | -U18 | -O98  | 74.2(7)  |
| O34 | -U17 | -O109 | 108.6(6) | O34 | -U18 | -O103 | 108.8(6) |
| O47 | -U17 | -O55  | 74.8(6)  | O47 | -U18 | -O65  | 76.0(7)  |
| O47 | -U17 | -O72  | 141.8(6) | O47 | -U18 | -O66  | 89.0(6)  |
| O47 | -U17 | -O83  | 85.5(7)  | O47 | -U18 | -O75  | 89.3(7)  |
| O47 | -U17 | -O87  | 91.0(7)  | O47 | -U18 | -O98  | 143.6(7) |
| O47 | -U17 | -O109 | 176.3(6) | O47 | -U18 | -O103 | 177.2(5) |
| O55 | -U17 | -O72  | 143.3(7) | O65 | -U18 | -O66  | 92.3(6)  |
| O55 | -U17 | -O83  | 89.0(6)  | O65 | -U18 | -O75  | 87.6(6)  |
| O55 | -U17 | -O87  | 90.5(6)  | O65 | -U18 | -O98  | 140.1(7) |
| O55 | -U17 | -O109 | 109.0(6) | O65 | -U18 | -O103 | 105.7(6) |
| O72 | -U17 | -O83  | 91.2(6)  | O66 | -U18 | -O75  | 178.2(7) |
| O72 | -U17 | -O87  | 91.2(6)  | O66 | -U18 | -O98  | 92.5(6)  |
| O72 | -U17 | -O109 | 34.5(6)  | O66 | -U18 | -O103 | 88.8(6)  |
| O83 | -U17 | -O87  | 176.5(8) | O75 | -U18 | -O98  | 88.7(6)  |
| O83 | -U17 | -O109 | 94.4(7)  | O75 | -U18 | -O103 | 92.9(7)  |
| O87 | -U17 | -O109 | 89.1(7)  | O98 | -U18 | -O103 | 34.9(7)  |

Table S20 - Bond Angles (Degrees) (continued)  
For U44a

|     |      |      |          |      |      |       |          |
|-----|------|------|----------|------|------|-------|----------|
| O13 | -U19 | -O14 | 66.3(6)  | O27  | -U20 | -O28  | 176.8(7) |
| O13 | -U19 | -O15 | 177.3(5) | O27  | -U20 | -O32  | 68.1(5)  |
| O13 | -U19 | -O39 | 90.9(7)  | O27  | -U20 | -O40  | 88.3(6)  |
| O13 | -U19 | -O57 | 140.9(5) | O27  | -U20 | -O73  | 90.7(6)  |
| O13 | -U19 | -O63 | 88.0(7)  | O27  | -U20 | -O74  | 74.6(5)  |
| O13 | -U19 | -O97 | 111.6(6) | O27  | -U20 | -O101 | 143.5(6) |
| O13 | -U19 | -O99 | 76.6(6)  | O27  | -U20 | -O106 | 109.5(5) |
| O14 | -U19 | -O15 | 111.2(6) | O28  | -U20 | -O32  | 110.0(5) |
| O14 | -U19 | -O39 | 88.2(6)  | O28  | -U20 | -O40  | 89.1(6)  |
| O14 | -U19 | -O57 | 74.8(7)  | O28  | -U20 | -O73  | 91.8(6)  |
| O14 | -U19 | -O63 | 89.4(6)  | O28  | -U20 | -O74  | 107.3(6) |
| O14 | -U19 | -O97 | 177.6(7) | O28  | -U20 | -O101 | 34.8(6)  |
| O14 | -U19 | -O99 | 142.9(7) | O28  | -U20 | -O106 | 72.3(5)  |
| O15 | -U19 | -O39 | 90.1(7)  | O32  | -U20 | -O40  | 89.1(7)  |
| O15 | -U19 | -O57 | 36.6(6)  | O32  | -U20 | -O73  | 88.3(7)  |
| O15 | -U19 | -O63 | 90.9(7)  | O32  | -U20 | -O74  | 142.7(5) |
| O15 | -U19 | -O97 | 70.9(6)  | O32  | -U20 | -O101 | 75.4(6)  |
| O15 | -U19 | -O99 | 105.9(6) | O32  | -U20 | -O106 | 177.2(5) |
| O39 | -U19 | -O57 | 91.4(7)  | O40  | -U20 | -O73  | 177.4(8) |
| O39 | -U19 | -O63 | 177.6(7) | O40  | -U20 | -O74  | 91.6(6)  |
| O39 | -U19 | -O97 | 90.7(6)  | O40  | -U20 | -O101 | 91.6(6)  |
| O39 | -U19 | -O99 | 91.9(6)  | O40  | -U20 | -O106 | 89.5(7)  |
| O57 | -U19 | -O63 | 88.0(7)  | O73  | -U20 | -O74  | 90.5(6)  |
| O57 | -U19 | -O97 | 107.5(7) | O73  | -U20 | -O101 | 87.8(6)  |
| O57 | -U19 | -O99 | 142.3(6) | O73  | -U20 | -O106 | 93.2(7)  |
| O63 | -U19 | -O97 | 91.7(6)  | O74  | -U20 | -O101 | 141.8(6) |
| O63 | -U19 | -O99 | 90.0(6)  | O74  | -U20 | -O106 | 35.0(5)  |
| O97 | -U19 | -O99 | 35.0(7)  | O101 | -U20 | -O106 | 107.0(6) |

Table S20 - Bond Angles (Degrees) (continued)  
For U44a

|     |      |       |          |     |      |       |          |
|-----|------|-------|----------|-----|------|-------|----------|
| O29 | -U21 | -085  | 87.2(5)  | O29 | -U22 | -074  | 143.6(5) |
| O29 | -U21 | -086  | 110.7(6) | O29 | -U22 | -088  | 88.4(7)  |
| O29 | -U21 | -094  | 88.7(6)  | O29 | -U22 | -093  | 88.1(8)  |
| O29 | -U21 | -095  | 68.2(6)  | O29 | -U22 | -095  | 67.9(6)  |
| O29 | -U21 | -096  | 75.1(6)  | O29 | -U22 | -097  | 111.0(6) |
| O29 | -U21 | -098  | 144.9(7) | O29 | -U22 | -099  | 75.2(6)  |
| O29 | -U21 | -0103 | 178.7(6) | O29 | -U22 | -0106 | 177.9(5) |
| O85 | -U21 | -086  | 94.7(7)  | O74 | -U22 | -088  | 90.3(7)  |
| O85 | -U21 | -094  | 175.5(6) | O74 | -U22 | -093  | 91.0(8)  |
| O85 | -U21 | -095  | 87.7(7)  | O74 | -U22 | -095  | 75.7(6)  |
| O85 | -U21 | -096  | 90.1(7)  | O74 | -U22 | -097  | 105.4(6) |
| O85 | -U21 | -098  | 89.8(6)  | O74 | -U22 | -099  | 141.2(6) |
| O85 | -U21 | -0103 | 94.1(6)  | O74 | -U22 | -0106 | 35.9(5)  |
| O86 | -U21 | -094  | 88.4(7)  | O88 | -U22 | -093  | 175.7(8) |
| O86 | -U21 | -095  | 177.4(6) | O88 | -U22 | -095  | 90.9(6)  |
| O86 | -U21 | -096  | 35.7(6)  | O88 | -U22 | -097  | 91.3(6)  |
| O86 | -U21 | -098  | 104.5(6) | O88 | -U22 | -099  | 90.4(6)  |
| O86 | -U21 | -0103 | 69.0(6)  | O88 | -U22 | -0106 | 93.6(7)  |
| O94 | -U21 | -095  | 89.2(7)  | O93 | -U22 | -095  | 85.4(7)  |
| O94 | -U21 | -096  | 90.5(8)  | O93 | -U22 | -097  | 92.4(7)  |
| O94 | -U21 | -098  | 92.6(7)  | O93 | -U22 | -099  | 91.2(7)  |
| O94 | -U21 | -0103 | 90.1(6)  | O93 | -U22 | -0106 | 89.9(8)  |
| O95 | -U21 | -096  | 143.4(6) | O95 | -U22 | -097  | 177.6(7) |
| O95 | -U21 | -098  | 76.7(6)  | O95 | -U22 | -099  | 143.1(7) |
| O95 | -U21 | -0103 | 112.0(6) | O95 | -U22 | -0106 | 111.3(6) |
| O96 | -U21 | -098  | 139.9(6) | O97 | -U22 | -099  | 35.8(7)  |
| O96 | -U21 | -0103 | 104.6(6) | O97 | -U22 | -0106 | 69.7(6)  |
| O98 | -U21 | -0103 | 35.5(7)  | O99 | -U22 | -0106 | 105.4(6) |

Table S20 - Bond Angles (Degrees) (continued)  
For U44a

|      |      |      |          |      |      |       |          |
|------|------|------|----------|------|------|-------|----------|
| U4   | -O1  | -U6  | 108.0(6) | U7   | -O19 | -U8   | 127.0(7) |
| U3   | -O2  | -U5  | 109.0(7) | U7   | -O19 | -O78  | 70.9(9)  |
| U4   | -O3  | -U6  | 106.7(6) | U8   | -O19 | -O78  | 72.6(11) |
| U1   | -O4  | -U8  | 109.9(6) | U12  | -O20 | -O79  | 75.4(9)  |
| U7   | -O5  | -U16 | 110.6(7) | U6_d | -O20 | -U12  | 127.1(8) |
| U6   | -O6  | -O48 | 75.7(8)  | U6_d | -O20 | -O79  | 77.2(10) |
| U1_d | -O6  | -U6  | 123.3(8) | U10  | -O21 | -U13  | 111.0(7) |
| U1_d | -O6  | -O48 | 72.9(10) | U13  | -O22 | -U15  | 124.3(7) |
| U7   | -O7  | -U16 | 114.0(8) | U13  | -O22 | -O53  | 75.1(9)  |
| U8   | -O8  | -O84 | 73.5(10) | U15  | -O22 | -O53  | 74.3(8)  |
| U5_c | -O8  | -U8  | 120.8(8) | U5   | -O23 | -U10  | 126.0(7) |
| U5_c | -O8  | -O84 | 68.8(9)  | U5   | -O23 | -O62  | 72.5(11) |
| U1   | -O9  | -U9  | 124.4(8) | U10  | -O23 | -O62  | 71.4(10) |
| U1   | -O9  | -O59 | 74.3(9)  | U9   | -O24 | -U12  | 122.6(8) |
| U9   | -O9  | -O59 | 73.1(8)  | U9   | -O24 | -O38  | 74.1(11) |
| U10  | -O10 | -U13 | 112.4(8) | U12  | -O24 | -O38  | 73.8(8)  |
| U3   | -O11 | -U5  | 109.0(6) | U2   | -O25 | -U4   | 121.4(9) |
| U13  | -O12 | -U18 | 128.4(8) | U2   | -O25 | -O108 | 71.6(9)  |
| U13  | -O12 | -O65 | 75.1(10) | U4   | -O25 | -O108 | 73.7(11) |
| U18  | -O12 | -O65 | 75.2(12) | U3   | -O26 | -U17  | 123.3(8) |
| U9   | -O13 | -U19 | 110.9(7) | U3   | -O26 | -O55  | 74.1(8)  |
| U9   | -O14 | -U19 | 111.1(6) | U17  | -O26 | -O55  | 73.5(9)  |
| U16  | -O15 | -U19 | 124.2(7) | U14  | -O27 | -U20  | 107.6(6) |
| U16  | -O15 | -O57 | 71.9(10) | U16  | -O28 | -U20  | 123.7(6) |
| U19  | -O15 | -O57 | 75.9(11) | U16  | -O28 | -O101 | 72.9(9)  |
| U1   | -O16 | -U8  | 107.9(6) | U20  | -O28 | -O101 | 75.5(8)  |
| U2   | -O17 | -U11 | 109.1(5) | U21  | -O29 | -U22  | 107.9(7) |
| U2   | -O18 | -U11 | 111.6(7) | U14  | -O32 | -U20  | 108.3(7) |

Table S20 - Bond Angles (Degrees) (continued)  
For U44a

|       |      |        |          |       |      |        |          |
|-------|------|--------|----------|-------|------|--------|----------|
| U12   | -033 | -U15   | 108.0(6) | U3    | -055 | -U17   | 118.8(6) |
| U17   | -034 | -U18   | 107.0(6) | U3    | -055 | -026   | 69.1(8)  |
| U3    | -037 | -O100  | 73.7(11) | U17   | -055 | -026   | 70.7(8)  |
| U3    | -037 | -U11_a | 124.4(8) | U16   | -057 | -U19   | 119.0(6) |
| U11_a | -037 | -O100  | 74.8(8)  | U16   | -057 | -015   | 71.5(11) |
| U9    | -038 | -U12   | 118.3(6) | U19   | -057 | -015   | 67.6(10) |
| U9    | -038 | -024   | 69.7(10) | U1    | -059 | -U9    | 120.6(6) |
| U12   | -038 | -024   | 70.5(8)  | U1    | -059 | -09    | 70.3(8)  |
| U11   | -042 | -077   | 75.3(9)  | U9    | -059 | -09    | 70.7(8)  |
| U11   | -042 | -U14_b | 124.8(8) | U5    | -062 | -U10   | 124.9(6) |
| U14_b | -042 | -077   | 75.1(10) | U5    | -062 | -023   | 71.0(10) |
| U12   | -043 | -U15   | 106.2(6) | U10   | -062 | -023   | 71.3(10) |
| U7    | -044 | -051   | 71.9(10) | U13   | -065 | -U18   | 123.0(7) |
| U2_a  | -044 | -U7    | 127.1(7) | U13   | -065 | -012   | 70.4(11) |
| U2_a  | -044 | -051   | 72.1(8)  | U18   | -065 | -012   | 70.8(11) |
| U4    | -045 | -O104  | 73.5(8)  | U14   | -072 | -U17   | 118.5(7) |
| U4    | -045 | -U10_d | 128.0(8) | U14   | -072 | -O109  | 69.5(10) |
| U10_d | -045 | -O104  | 72.2(10) | U17   | -072 | -O109  | 71.9(10) |
| U17   | -047 | -U18   | 109.4(6) | U20   | -074 | -U22   | 120.7(6) |
| U6    | -048 | -06    | 68.4(8)  | U20   | -074 | -O106  | 73.3(10) |
| U1_d  | -048 | -U6    | 118.4(6) | U22   | -074 | -O106  | 69.3(11) |
| U1_d  | -048 | -06    | 71.5(9)  | U11   | -077 | -042   | 69.7(9)  |
| U7    | -051 | -044   | 73.0(11) | U11   | -077 | -U14_b | 118.5(8) |
| U2_a  | -051 | -U7    | 128.4(8) | U14_b | -077 | -042   | 69.5(10) |
| U2_a  | -051 | -044   | 73.0(8)  | U7    | -078 | -U8    | 128.0(7) |
| U13   | -053 | -U15   | 118.5(7) | U7    | -078 | -019   | 73.2(10) |
| U13   | -053 | -022   | 69.2(10) | U8    | -078 | -019   | 71.8(10) |
| U15   | -053 | -022   | 70.1(8)  | U12   | -079 | -020   | 69.5(9)  |

Table S20 - Bond Angles (Degrees) (continued)  
For U44a

|      |      |       |          |       |       |        |          |
|------|------|-------|----------|-------|-------|--------|----------|
| U6_d | -079 | -U12  | 118.8(8) | U3    | -O100 | -O37   | 69.4(10) |
| U6_d | -079 | -O20  | 68.7(9)  | U3    | -O100 | -U11_a | 118.8(7) |
| U8   | -084 | -O8   | 70.6(9)  | U11_a | -O100 | -O37   | 69.5(8)  |
| U5_c | -084 | -U8   | 122.8(7) | U16   | -O101 | -U20   | 120.2(9) |
| U5_c | -084 | -O8   | 75.3(9)  | U16   | -O101 | -O28   | 72.5(10) |
| U15  | -086 | -U21  | 124.1(7) | U20   | -O101 | -O28   | 69.7(9)  |
| U15  | -086 | -O96  | 73.9(10) | U18   | -O103 | -U21   | 122.6(7) |
| U21  | -086 | -O96  | 70.5(11) | U18   | -O103 | -O98   | 74.2(10) |
| U21  | -095 | -U22  | 107.8(7) | U21   | -O103 | -O98   | 71.3(9)  |
| U15  | -096 | -U21  | 124.8(8) | U4    | -O104 | -O45   | 70.1(8)  |
| U15  | -096 | -O86  | 71.8(10) | U4    | -O104 | -U10_d | 124.7(7) |
| U21  | -096 | -O86  | 73.9(12) | U10_d | -O104 | -O45   | 70.5(8)  |
| U19  | -097 | -U22  | 124.1(7) | U20   | -O106 | -U22   | 123.0(7) |
| U19  | -097 | -O99  | 76.5(9)  | U20   | -O106 | -O74   | 71.7(10) |
| U22  | -097 | -O99  | 72.3(8)  | U22   | -O106 | -O74   | 74.8(11) |
| U18  | -098 | -U21  | 121.8(8) | U2    | -O108 | -U4    | 121.3(8) |
| U18  | -098 | -O103 | 70.9(9)  | U2    | -O108 | -O25   | 73.1(9)  |
| U21  | -098 | -O103 | 73.2(10) | U4    | -O108 | -O25   | 71.9(10) |
| U19  | -099 | -U22  | 119.3(8) | U14   | -O109 | -U17   | 123.3(9) |
| U19  | -099 | -O97  | 68.6(8)  | U14   | -O109 | -O72   | 76.5(10) |
| U22  | -099 | -O97  | 71.9(10) | U17   | -O109 | -O72   | 73.7(12) |
